# Supplementary material for: Regioselective C–C cross-coupling of 1,2,4-thiadiazoles with maleimides through iridium-catalyzed C–H activation
Source: Royal Society of Chemistry journal article supplement (doi:10.1039/c9ob01539f), 2019-01-01

*Supporting Information*

**Regioselective C-C cross-coupling of 1,2,4-thiadiazoles with maleimide through iridium-catalyzed C-H activation**

**Ting Tian,<sup>a,‡</sup> An-Shun Dong,<sup>a,‡</sup> Dan Chen, Xian-Ting Cao<sup>a\*</sup> and Guannan Wang<sup>a, b\*</sup>**

<sup>a</sup> The Key Laboratory for Medical Tissue Engineering, College of Medical Engineering, Jining Medical University, Jining, 272067, P. R. China

<sup>b</sup> Key Laboratory of Spine and Spinal Cord Injury Repair and Regeneration (Tongji University) , Ministry of Education, 389 Xincun Road, 200065 Shanghai, P. R. China

<sup>‡</sup> Ting Tian and An-Shun Dong contributed equally.

**Table of Contents**

|                                                                        |    |
|------------------------------------------------------------------------|----|
| 1. General Information.....                                            | 2  |
| 2. Experimental Section.....                                           | 2  |
| 3. Characterization data of the products.....                          | 3  |
| 4. <sup>1</sup> H and <sup>13</sup> C NMR spectra of the products..... | 20 |

## 1. General Information

All the reagents were obtained commercially and used without any prior purification. <sup>1</sup>H NMR spectra were recorded on a BrukerAvanceII 500 spectrometer. All products were isolated by column chromatography on a silica gel (200–300 mesh) column using petroleum ether (60-90°C) and ethyl acetate. Chemical shifts were reported in parts per million (ppm,  $\delta$ ) downfield from tetramethylsilane. Proton coupling patterns are described as singlet (s), doublet (d), triplet (t), quartet (q), multiplet (m), doublet of doublets (dd).

## 2. Experimental Information

**Preparation of the materials starting materials (Thioamides) were prepared according to our previous work.** [1-2]

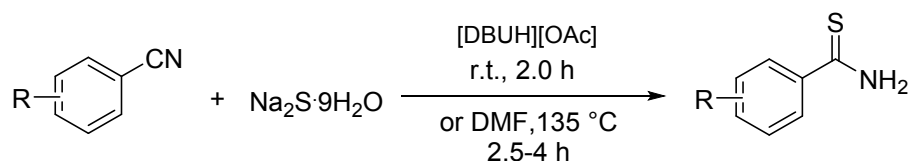

**Preparation of the materials starting materials (1,2,4-Thiadiazoles) were prepared according to literature procedures.** [3-4]

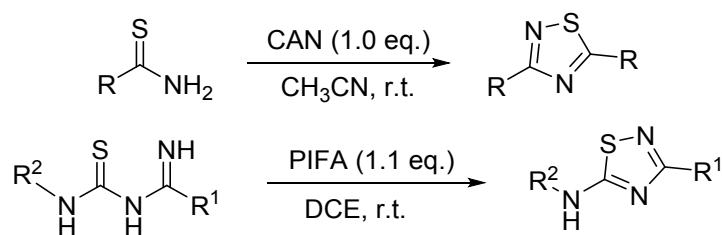

**General procedure for the synthesis of product 3a-3w and 6a-6I (compound 3a as the example).**

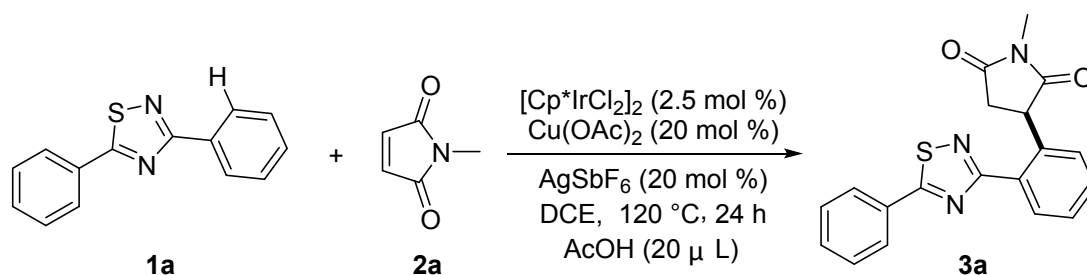

3,5-Diphenyl-1,2,4-thiadiazole (**1a**, 0.2 mmol), *N*-methylmaleimide (**2a**, 0.4 mmol),

[Cp\*IrCl<sub>2</sub>]<sub>2</sub> (2.5 mol %), Cu(OAc)<sub>2</sub> (20 mol %), AgSbF<sub>6</sub> (20 mol %), AcOH (20 μL) were dissolved in DCE (1 mL) in a pressure tube. The mixture was stirred at 120 °C for 24 hours. After that, the solvent was removed under vacuum and the residue was purified by silica gel chromatography to afford product (**3a**).

**Preparation of the Benzonitrile-*d*<sub>5</sub><sup>[5]</sup> and 3,5-diphenyl-1,2,4-thiadiazole-*d*<sub>10</sub><sup>[1, 3]</sup> (1,2,4-Thiadiazoles) were prepared according to literature.**

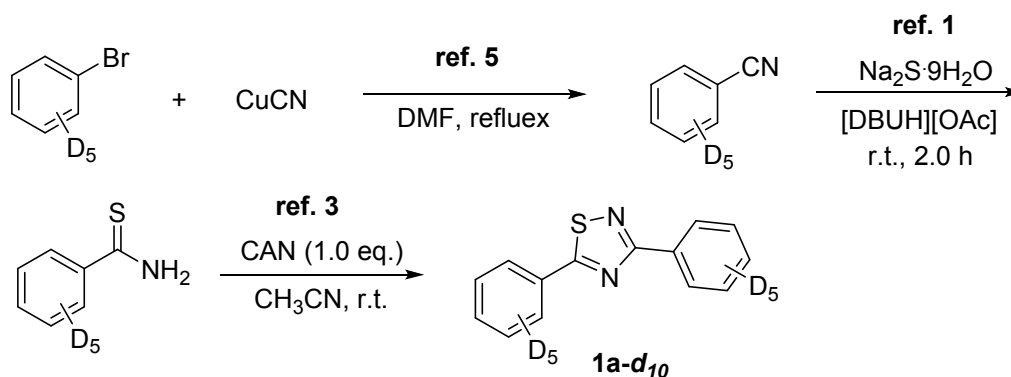

[1] X.-T. Cao, L. Qiao, H. Zheng, H.-Y. Yang, P.-F. Zhang. *RSC Adv.*, 2018, **8**, 170.

[2] X.-T. Cao, H.-Y. Yang, H. Zheng, P.-F. Zhang. *Heterocycles*, 2018, **96**, 509.

[3] G. Vanajatha, V. P. Reddy. *Tetrahedron Lett.*, 2016, **57**, 2356.

[4] A. Mariappan, K. Rajaguru, N. M. Chola, S. Muthusubramanian, N. Bhuvanesh. *J. Org. Chem.* 2016, **81**, 6573.

[5] Y. Koseki, K. Kitazawa, M. Miyake, T. Kochi, F. Kakiuchi. *J. Org. Chem.* 2017, **82**, 6503.

### 3. Characterization data of the products.

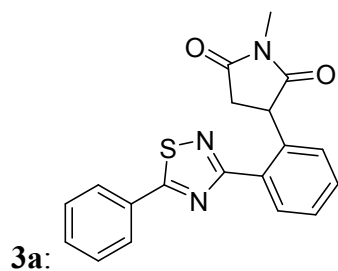

White solid; <sup>1</sup>H NMR (500 MHz, CDCl<sub>3</sub>) δ 8.41-8.26 (m, 1H), 8.06-7.88 (m, 2H), 7.59-7.44 (m, 5H), 7.26-7.24 (m, 1H), 5.11-4.93 (m, 1H), 3.41-3.34 (m, 1H), 3.02 (s, 3H), 2.92-2.85 ppm (m, 1H). <sup>13</sup>C NMR (126 MHz, CDCl<sub>3</sub>) δ 187.87, 178.54, 176.66, 173.39, 136.44, 132.25, 132.14, 132.01, 130.77, 130.30, 129.70, 129.41, 128.17, 127.56, 45.45, 38.52, 25.11 ppm. HRMS (ESI): Calculated for C<sub>19</sub>H<sub>15</sub>N<sub>3</sub>O<sub>2</sub>S: [M+H]<sup>+</sup>

350.0958, Found 350.0937.

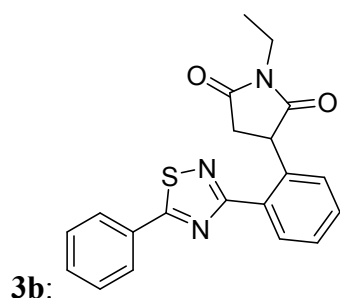

White solid;  $^1\text{H}$  NMR (500 MHz,  $\text{CDCl}_3$ )  $\delta$  8.34-8.19 (m, 1H), 8.02-7.85 (m, 2H), 7.55-7.34 (m, 5H), 7.18-7.10 (m, 1H), 5.02-4.76 (m, 1H), 3.53 (q,  $J = 7.2$  Hz, 2H), 3.32-3.23 (m, 1H), 2.80-2.71 (m, 1H), 1.15 ppm (t,  $J = 7.2$  Hz, 3H).  $^{13}\text{C}$  NMR (126 MHz,  $\text{CDCl}_3$ )  $\delta$  187.79, 178.29, 176.46, 173.38, 136.72, 132.23, 132.13, 132.06, 130.80, 130.33, 129.41, 128.10, 127.55, 45.25, 38.53, 33.97, 13.14 ppm. HRMS (ESI): Calculated for  $\text{C}_{20}\text{H}_{17}\text{N}_3\text{O}_2\text{S}_2$ :  $[\text{M}+\text{H}]^+$  364.1114, Found 364.1091.

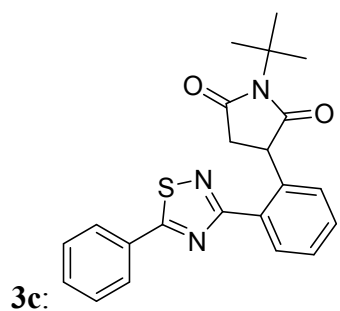

White solid;  $^1\text{H}$  NMR (500 MHz,  $\text{CDCl}_3$ )  $\delta$  8.34 (d,  $J = 7.4$  Hz, 1H), 8.00 (d,  $J = 8.0$  Hz, 2H), 7.56-7.50 (m, 3H), 7.48-7.43 (m, 2H), 7.24 (d,  $J = 7.3$  Hz, 1H), 4.95-4.80 (m, 1H), 3.25-3.18 (m, 1H), 2.79-2.72 (m, 1H), 1.63 ppm (s, 9H).  $^{13}\text{C}$  NMR (126 MHz,  $\text{CDCl}_3$ )  $\delta$  187.63, 179.44, 177.56, 173.45, 137.37, 132.18, 132.16, 132.05, 130.71, 130.40, 129.44, 129.39, 127.92, 127.56, 58.44, 45.30, 38.69, 28.45 ppm. HRMS (ESI): Calculated for  $\text{C}_{22}\text{H}_{21}\text{N}_3\text{O}_2\text{S}_2$ :  $[\text{M}+\text{H}]^+$  392.1427, Found 392.1402.

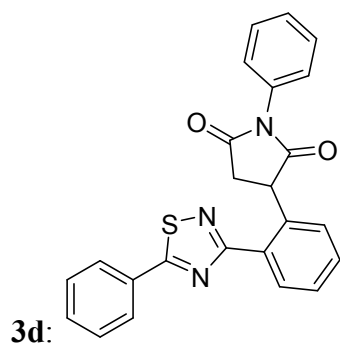

White solid;  $^1\text{H}$  NMR (500 MHz,  $\text{CDCl}_3$ )  $\delta$  8.45-8.27 (m, 1H), 8.00-7.86 (m, 2H), 7.51-7.36 (m, 7H), 7.34-7.22 (m, 4H), 5.10-4.91 (m, 1H), 3.48-3.37 (m, 1H), 3.08-2.94 ppm (m, 1H).  $^{13}\text{C}$  NMR (126 MHz,  $\text{CDCl}_3$ )  $\delta$  187.83, 177.24, 175.51, 173.34, 136.13, 132.43, 132.28, 132.26, 131.84, 130.85, 130.32, 129.42, 129.14, 128.47, 128.38, 127.62, 126.38, 46.08, 38.32 ppm. HRMS (ESI): Calculated for  $\text{C}_{24}\text{H}_{19}\text{N}_3\text{O}_2\text{S}$ :  $[\text{M}+\text{H}]^+$  412.1114, Found 412.1090.

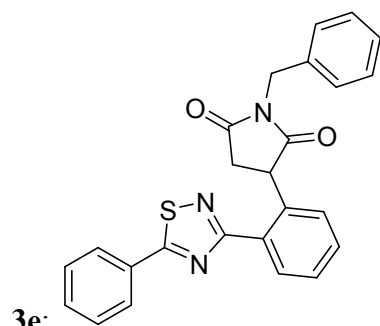

White solid;  $^1\text{H}$  NMR (500 MHz,  $\text{CDCl}_3$ )  $\delta$  8.32 (d,  $J = 7.2$  Hz, 1H), 7.95 (d,  $J = 6.8$  Hz, 2H), 7.57-7.39 (m, 7H), 7.35-7.27 (m, 3H), 7.19-7.12 (m, 1H), 5.02-4.91 (m, 1H), 4.69 (s, 2H), 3.38-3.30 (m, 1H), 2.88-2.81 ppm (m, 1H).  $^{13}\text{C}$  NMR (126 MHz,  $\text{CDCl}_3$ )  $\delta$  187.82, 178.12, 176.19, 173.23, 136.46, 136.01, 132.20, 132.13, 132.00, 130.75, 130.33, 129.73, 129.39, 129.24, 128.73, 128.15, 127.98, 127.54, 45.48, 42.68, 38.44 ppm. HRMS (ESI): Calculated for  $\text{C}_{25}\text{H}_{19}\text{N}_3\text{O}_2\text{S}$ :  $[\text{M}+\text{H}]^+$  426.1271, Found 426.1258.

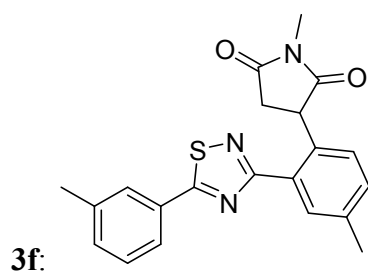

White solid;  $^1\text{H}$  NMR (500 MHz,  $\text{CDCl}_3$ )  $\delta$  8.05 (s, 1H), 7.71 (s, 1H), 7.69 (d,  $J = 7.7$  Hz, 1H), 7.33-7.26 (m, 2H), 7.20 (d,  $J = 7.9$  Hz, 1H), 7.05 (d,  $J = 7.9$  Hz, 1H), 4.90-4.77 (m, 1H), 3.28-3.21 (m, 1H), 2.91 (s, 3H), 2.82-2.75 (m, 1H), 2.37 (s, 3H), 2.36 ppm (s, 3H).  $^{13}\text{C}$  NMR (126 MHz,  $\text{CDCl}_3$ )  $\delta$  188.04, 178.72, 176.77, 173.49, 139.35, 138.03, 133.39, 133.04, 132.57, 131.75, 131.46, 130.21, 129.82, 129.28, 128.02, 124.77, 45.23, 38.54, 25.06, 21.33, 21.04 ppm. HRMS (ESI): Calculated for  $\text{C}_{21}\text{H}_{19}\text{N}_3\text{O}_2\text{S}$ :  $[\text{M}+\text{H}]^+$  378.1271, Found 378.1250.

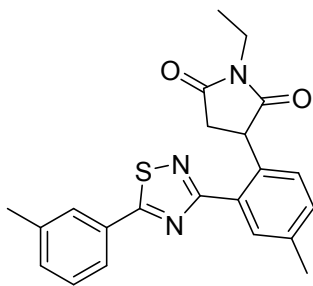

**3g:**

White solid;  $^1\text{H}$  NMR (500 MHz,  $\text{CDCl}_3$ )  $\delta$  8.14 (s, 1H), 7.79 (s, 1H), 7.77 (d,  $J = 7.5$  Hz, 1H), 7.38 (t,  $J = 7.5$  Hz, 1H), 7.34 (d,  $J = 7.6$  Hz, 1H), 7.29-7.26 (m, 1H), 7.11 (d,  $J = 7.9$  Hz, 1H), 5.05-4.85 (m, 1H), 3.63-3.56 (m, 2H), 3.34-3.27 (m, 1H), 2.85-2.78 (m, 1H), 2.44 (s, 3H), 2.43 (s, 3H), 1.22 ppm (t,  $J = 7.2$  Hz, 3H).  $^{13}\text{C}$  NMR (126 MHz,  $\text{CDCl}_3$ )  $\delta$  187.93, 178.43, 176.53, 173.48, 139.30, 137.91, 133.69, 133.01, 132.57, 131.81, 131.48, 130.24, 129.54, 129.27, 128.01, 124.75, 45.03, 38.52, 33.90, 21.33, 21.05, 13.13 ppm. HRMS (ESI): Calculated for  $\text{C}_{22}\text{H}_{21}\text{N}_3\text{O}_2\text{S}$ :  $[\text{M}+\text{H}]^+$  392.1427, Found 392.1407.

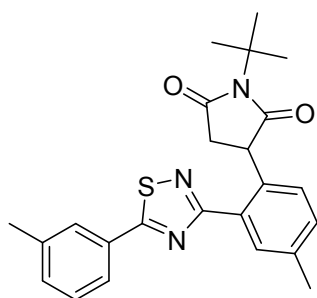

**3h:**

White solid;  $^1\text{H}$  NMR (500 MHz,  $\text{CDCl}_3$ )  $\delta$  8.14 (s, 1H), 7.82 (s, 1H), 7.79 (d,  $J = 7.6$  Hz, 1H), 7.44-7.32 (m, 2H), 7.27 (d,  $J = 7.8$  Hz, 1H), 7.12 (d,  $J = 7.8$  Hz, 1H), 4.85-4.70 (m, 1H), 3.21-3.13 (m, 1H), 2.77-2.70 (m, 1H), 2.45 (s, 3H), 2.43 (s, 3H), 1.62 ppm (s, 9H).  $^{13}\text{C}$  NMR (126 MHz,  $\text{CDCl}_3$ )  $\delta$  187.80, 179.60, 177.67, 173.56, 139.30, 137.70, 134.35, 132.96, 132.59, 131.82, 131.42, 130.33, 129.49, 129.27, 128.04, 124.77, 58.35, 45.02, 38.70, 28.45, 21.35, 21.04 ppm. HRMS (ESI): Calculated for  $\text{C}_{24}\text{H}_{25}\text{N}_3\text{O}_2\text{S}$ :  $[\text{M}+\text{H}]^+$  420.1740, Found 420.1725.

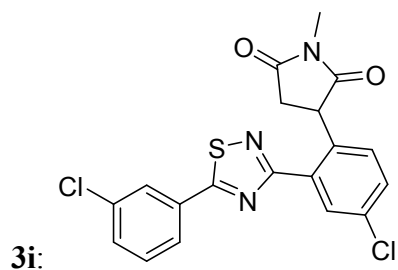

White solid;  $^1\text{H}$  NMR (500 MHz,  $\text{CDCl}_3$ )  $\delta$  8.36 (s, 1H), 7.99 (s, 1H), 7.85 (d,  $J = 7.7$  Hz, 1H), 7.55-7.51 (m, 1H), 7.49-7.43 (m, 2H), 7.20 (d,  $J = 8.3$  Hz, 1H), 5.07-4.97 (m, 1H), 3.40-3.32 (m, 1H), 3.03 (s, 3H), 2.85-2.78 ppm (m, 1H).  $^{13}\text{C}$  NMR (126 MHz,  $\text{CDCl}_3$ )  $\delta$  186.58, 178.07, 176.23, 172.14, 135.57, 134.89, 134.12, 133.09, 132.33, 132.07, 131.55, 131.24, 130.83, 130.75, 127.42, 125.76, 44.90, 38.18, 25.19 ppm. HRMS (ESI): Calculated for  $\text{C}_{19}\text{H}_{13}\text{Cl}_2\text{N}_3\text{O}_2\text{S}$ :  $[\text{M}+\text{H}]^+$  418.0179, Found 418.0190.

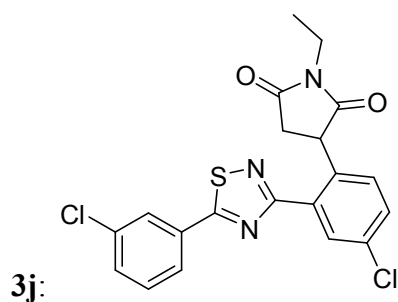

White solid;  $^1\text{H}$  NMR (500 MHz,  $\text{CDCl}_3$ )  $\delta$  8.28 (s, 1H), 7.91 (s, 1H), 7.77 (d,  $J = 7.7$  Hz, 1H), 7.46-7.41 (m, 1H), 7.40-7.34 (m, 2H), 7.09 (d,  $J = 8.3$  Hz, 1H), 5.00-4.82 (m, 1H), 3.53 (q,  $J = 7.2$  Hz, 2H), 3.28-3.20 (m, 1H), 2.74-2.64 (m, 1H), 1.15 ppm (t,  $J = 7.2$  Hz, 3H).  $^{13}\text{C}$  NMR (126 MHz,  $\text{CDCl}_3$ )  $\delta$  186.48, 177.80, 176.00, 172.12, 135.55, 135.12, 134.05, 133.12, 132.30, 132.07, 131.57, 131.02, 130.84, 130.74, 127.40, 125.75, 44.76, 38.16, 34.05, 13.13 ppm. HRMS (ESI): Calculated for  $\text{C}_{20}\text{H}_{15}\text{Cl}_2\text{N}_3\text{O}_2\text{S}$ :  $[\text{M}+\text{H}]^+$  432.0335, Found 432.0350.

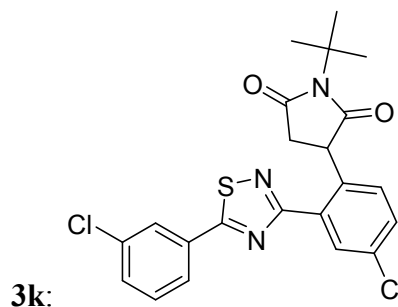

White solid;  $^1\text{H}$  NMR (500 MHz,  $\text{CDCl}_3$ )  $\delta$  8.38 (s, 1H), 8.01 (s, 1H), 7.87 (d,  $J = 8.3$  Hz, 1H), 7.55-7.52 (m, 1H), 7.49-7.43 (m, 2H), 7.18 (d,  $J = 8.3$  Hz, 1H), 4.90-4.80 (m, 1H), 3.23-3.16 (m, 1H), 2.74-2.67 (m, 1H), 1.63 ppm (s, 9H).  $^{13}\text{C}$  NMR (126 MHz,  $\text{CDCl}_3$ )  $\delta$  186.35, 178.92, 177.12, 172.20, 135.72, 135.56, 133.87, 133.11, 132.26, 132.10, 131.65, 131.12, 130.77, 130.73, 127.43, 125.76, 58.55, 44.89, 38.30, 28.42 ppm. HRMS (ESI): Calculated for  $\text{C}_{22}\text{H}_{19}\text{Cl}_2\text{N}_3\text{O}_2\text{S}$ :  $[\text{M}+\text{H}]^+$  460.0648, Found 460.0662.

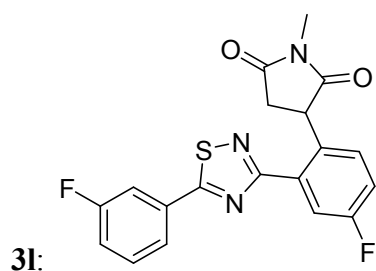

White solid;  $^1\text{H}$  NMR (500 MHz,  $\text{CDCl}_3$ )  $\delta$  8.09 (d,  $J = 9.7$  Hz, 1H), 7.79-7.65 (m, 2H), 7.54-7.48 (m, 1H), 7.29-7.22 (m, 2H), 7.21-7.16 (m, 1H), 5.07-5.00 (m, 1H), 3.40-3.33 (m, 1H), 3.04 (s, 3H), 2.86-2.79 ppm (m, 1H).  $^{13}\text{C}$  NMR (126 MHz,  $\text{CDCl}_3$ )  $\delta$  186.70, 186.67, 178.33, 176.35, 172.25, 172.23, 163.04 (d,  $J = 248.9$  Hz), 161.95 (d,  $J = 247.7$  Hz), 133.49 (d,  $J = 8.1$  Hz), 132.31 (d,  $J = 3.4$  Hz), 131.89 (d,  $J = 8.1$  Hz), 131.69 (d,  $J = 8.1$  Hz), 131.22 (d,  $J = 8.2$  Hz), 123.45 (d,  $J = 3.1$  Hz), 119.34 (d,  $J = 21.3$  Hz), 119.00 (d,  $J = 23.9$  Hz), 117.87 (d,  $J = 21.4$  Hz), 114.35 (d,  $J = 23.5$  Hz), 44.82, 38.29, 25.15 ppm. HRMS (ESI): Calculated for  $\text{C}_{19}\text{H}_{13}\text{F}_2\text{N}_3\text{O}_2\text{S}$ :  $[\text{M}+\text{H}]^+$  386.0770, Found 386.0746

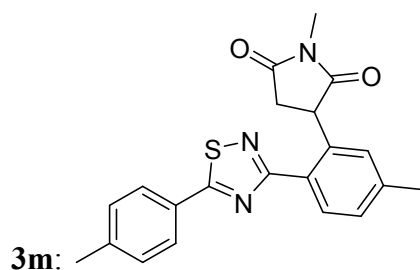

White solid;  $^1\text{H}$  NMR (500 MHz,  $\text{CDCl}_3$ )  $\delta$  8.23 (d,  $J = 8.0$  Hz, 1H), 7.85 (d,  $J = 8.0$  Hz, 2H), 7.30 (d,  $J = 8.0$  Hz, 2H), 7.24 (d,  $J = 5.6$  Hz, 1H), 7.02 (s, 1H), 5.13-4.89 (m, 1H), 3.38-3.32 (m, 1H), 3.03 (s, 3H), 2.88-2.83 (m, 1H), 2.42 (s, 3H), 2.40 ppm (s,



3H).  $^{13}\text{C}$  NMR (126 MHz,  $\text{CDCl}_3$ )  $\delta$  187.65, 178.74, 176.85, 173.32, 142.84, 140.95, 136.24, 132.12, 130.39, 130.18, 130.03, 129.34, 129.17, 128.93, 127.73, 127.47, 45.44, 38.51, 25.12, 21.68, 21.38 ppm. HRMS (ESI): Calculated for  $\text{C}_{21}\text{H}_{19}\text{N}_3\text{O}_2\text{S}$ :  $[\text{M}+\text{H}]^+$  378.1271, Found 378.1266.

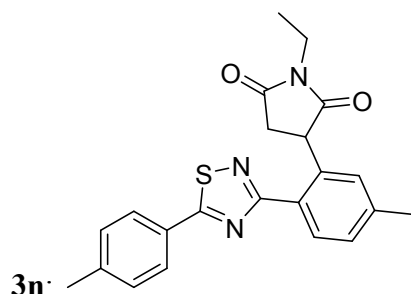

White solid;  $^1\text{H}$  NMR (500 MHz,  $\text{CDCl}_3$ )  $\delta$  8.24 (d,  $J = 8.0$  Hz, 1H), 7.83 (d,  $J = 8.0$  Hz, 2H), 7.34-7.26 (m, 3H), 7.01 (s, 1H), 5.05-4.90 (m, 1H), 3.62 (q,  $J = 7.1$  Hz, 2H), 3.37-3.29 (m, 1H), 2.85-2.79 (m, 1H), 2.43 (s, 3H), 2.40 (s, 3H), 1.24 ppm (t,  $J = 7.1$  Hz, 3H).  $^{13}\text{C}$  NMR (126 MHz,  $\text{CDCl}_3$ )  $\delta$  187.57, 178.44, 176.61, 173.33, 142.82, 140.94, 136.48, 132.13, 130.12, 130.03, 129.41, 128.87, 127.79, 127.47, 45.27, 38.51, 33.95, 21.68, 21.41, 13.13 ppm. HRMS (ESI): Calculated for  $\text{C}_{22}\text{H}_{21}\text{N}_3\text{O}_2\text{S}$ :  $[\text{M}+\text{H}]^+$  392.1427, Found 392.1407.

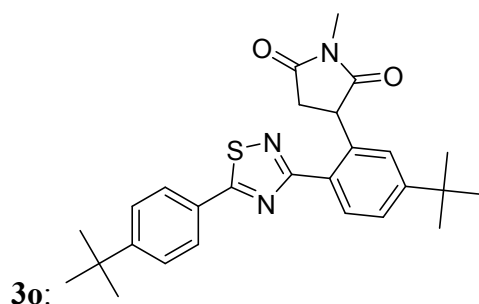

White solid;  $^1\text{H}$  NMR (500 MHz,  $\text{CDCl}_3$ )  $\delta$  8.18 (d,  $J = 8.3$  Hz, 1H), 7.81 (d,  $J = 8.4$  Hz, 2H), 7.44 (d,  $J = 8.4$  Hz, 2H), 7.41 (d,  $J = 8.3$ , 1H), 7.15 (s, 1H), 4.85-4.75 (m, 1H), 3.29-3.21 (m, 1H), 2.92 (s, 3H), 2.89-2.82 (m, 1H), 1.28 (s, 9H), 1.27 ppm (s, 9H).  $^{13}\text{C}$  NMR (126 MHz,  $\text{CDCl}_3$ )  $\delta$  187.57, 178.62, 176.83, 173.36, 155.92, 153.91, 135.63, 131.99, 129.28, 127.68, 127.37, 127.15, 126.32, 125.41, 46.20, 38.44, 35.16, 34.89, 31.17, 31.13, 25.09 ppm. HRMS (ESI): Calculated for  $\text{C}_{27}\text{H}_{31}\text{N}_3\text{O}_2\text{S}$ :  $[\text{M}+\text{H}]^+$  462.2210, Found 462.2188.

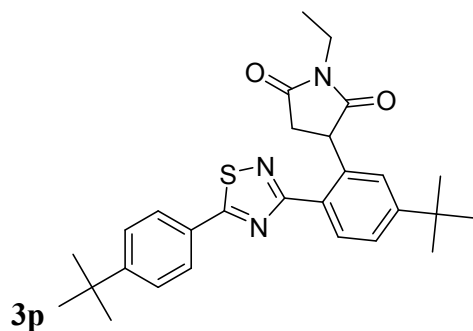

White solid;  $^1\text{H}$  NMR (500 MHz,  $\text{CDCl}_3$ )  $\delta$  8.20 (d,  $J = 8.3$  Hz, 1H), 7.83 (d,  $J = 8.3$  Hz, 2H), 7.46 (d,  $J = 8.4$  Hz, 2H), 7.41 (d,  $J = 8.3$  Hz, 1H), 7.12 (s, 1H), 4.99-4.75 (m, 1H), 3.54 (dd,  $J = 14.2, 7.0$  Hz, 2H), 3.29-3.21 (m, 1H), 2.83-2.76 (m, 1H), 1.29 (s, 9H), 1.27 (s, 9H), 1.16 ppm (t,  $J = 7.1$  Hz, 3H).  $^{13}\text{C}$  NMR (126 MHz,  $\text{CDCl}_3$ )  $\delta$  187.49, 178.47, 176.68, 173.33, 155.90, 153.91, 136.15, 131.94, 129.31, 127.74, 127.36, 126.51, 126.32, 125.33, 45.81, 38.52, 35.16, 34.90, 33.88, 31.13, 13.14 ppm. HRMS (ESI): Calculated for  $\text{C}_{28}\text{H}_{33}\text{N}_3\text{O}_2\text{S}$ :  $[\text{M}+\text{H}]^+$  476.2336, Found 476.2311.

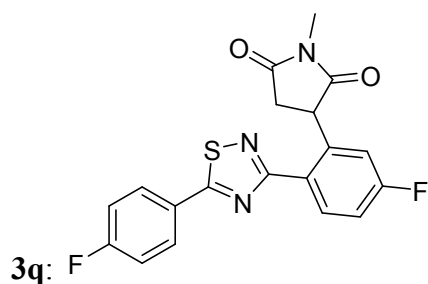

White solid;  $^1\text{H}$  NMR (500 MHz,  $\text{CDCl}_3$ )  $\delta$  8.30-8.25 (m, 1H), 7.98-7.80 (m, 2H), 7.13 (t,  $J = 8.5$  Hz, 2H), 7.10-7.05 (m, 1H), 6.92-6.87 (m, 1H), 5.05-4.92 (m, 1H), 3.33-3.25 (m, 1H), 2.95 (s, 3H), 2.79-2.73 ppm (m, 1H).  $^{13}\text{C}$  NMR (126 MHz,  $\text{CDCl}_3$ )  $\delta$  186.59, 177.84, 176.16, 172.45, 165.06 (d,  $J = 254.2$  Hz), 163.65 (d,  $J = 252.2$  Hz), 138.99 (d,  $J = 7.6$  Hz), 134.45 (d,  $J = 8.7$  Hz), 134.20, 129.75 (d,  $J = 9.0$  Hz), 128.15 (d,  $J = 3.2$  Hz), 126.58 (d,  $J = 3.3$  Hz), 116.70 (d,  $J = 22.3$  Hz), 115.27 (d,  $J = 21.1$  Hz), 45.26, 38.15, 25.18 ppm. HRMS (ESI): Calculated for  $\text{C}_{19}\text{H}_{13}\text{F}_2\text{N}_3\text{O}_2\text{S}$ :  $[\text{M}+\text{H}]^+$  386.0760, Found 386.0746.

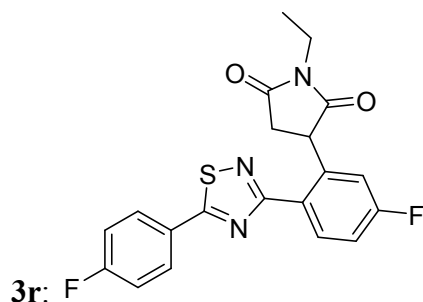

White solid;  $^1\text{H}$  NMR (500 MHz,  $\text{CDCl}_3$ )  $\delta$  8.39-8.34 (m, 1H), 8.10-7.90 (m, 2H), 7.21 (t,  $J = 8.6$  Hz, 2H), 7.17-7.13 (m, 1H), 6.96-6.93 (m, 1H), 5.15-4.96 (m, 1H), 3.62 (q,  $J = 6.8$  Hz, 2H), 3.39-3.31 (m, 1H), 2.84-2.77 (m, 1H), 1.24 ppm (t,  $J = 7.2$  Hz, 3H).  $^{13}\text{C}$  NMR (126 MHz,  $\text{CDCl}_3$ )  $\delta$  186.50, 177.59, 175.95, 172.43, 165.05 (d,  $J = 254.1$  Hz), 163.64 (d,  $J = 252.1$  Hz), 139.22 (d,  $J = 7.7$  Hz), 134.45 (d,  $J = 8.8$  Hz), 129.74 (d,  $J = 9.0$  Hz), 128.19 (d,  $J = 3.3$  Hz), 126.61 (d,  $J = 3.3$  Hz), 116.68 (d,  $J = 22.3$  Hz), 116.41, 115.20 (d,  $J = 21.1$  Hz), 45.12, 38.13, 34.06, 13.10 ppm. HRMS (ESI): Calculated for  $\text{C}_{20}\text{H}_{15}\text{F}_2\text{N}_3\text{O}_2\text{S}$ :  $[\text{M}+\text{H}]^+400.0926$ , Found 400.0912.

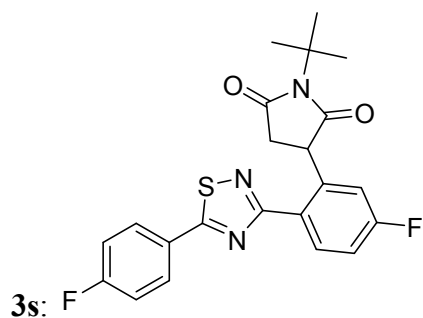

White solid;  $^1\text{H}$  NMR (500 MHz,  $\text{CDCl}_3$ )  $\delta$  8.30-8.27 (m, 1H), 7.95-7.89 (m, 2H), 7.14 (t,  $J = 8.5$  Hz, 2H), 7.06 (t,  $J = 8.2$  Hz, 1H), 6.89-6.85 (m, 1H), 4.84-4.75 (m, 1H), 3.17-3.09 (m, 1H), 2.68-2.61 (m, 1H), 1.55 ppm (s, 9H).  $^{13}\text{C}$  NMR (126 MHz,  $\text{CDCl}_3$ )  $\delta$  186.37, 178.72, 177.07, 172.51, 165.04 (d,  $J = 254.1$  Hz), 163.62 (d,  $J = 251.9$  Hz), 139.88 (d,  $J = 7.7$  Hz), 134.47 (d,  $J = 8.7$  Hz), 129.75 (d,  $J = 8.9$  Hz), 128.19 (d,  $J = 3.2$  Hz), 126.69 (d,  $J = 3.3$  Hz), 116.67 (d,  $J = 22.3$  Hz), 116.44, 115.02 (d,  $J = 21.1$  Hz), 58.62, 45.22, 38.31, 28.41 ppm. HRMS (ESI): Calculated for  $\text{C}_{22}\text{H}_{19}\text{F}_2\text{N}_3\text{O}_2\text{S}$ :  $[\text{M}+\text{H}]^+428.1239$ , Found 428.1222.

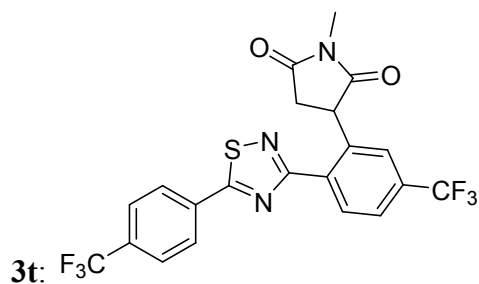

White solid;  $^1\text{H}$  NMR (500 MHz,  $\text{CDCl}_3$ )  $\delta$  8.50 (d,  $J = 8.2$  Hz, 1H), 8.12 (d,  $J = 8.1$  Hz, 2H), 7.82 (d,  $J = 8.2$  Hz, 2H), 7.75 (d,  $J = 8.2$  Hz, 1H), 7.53 (s, 1H), 5.07-4.98 (m, 1H), 3.43-3.36 (m, 1H), 3.04 (s, 3H), 2.95-2.88 ppm (m, 1H).  $^{13}\text{C}$  NMR (126 MHz,  $\text{CDCl}_3$ )  $\delta$  186.72, 177.56, 175.91, 172.44, 137.11, 134.80, 134.02 (q,  $J = 32.9$  Hz), 132.99, 132.93, 132.68 (q,  $J = 32.8$  Hz), 127.98, 127.06, 126.57 (q,  $J = 3.7$  Hz), 125.12 (q,  $J = 3.5$  Hz), 123.49 (q,  $J = 272.7$  Hz), 123.48 (q,  $J = 272.5$  Hz), 45.49, 38.05, 25.28 ppm. HRMS (ESI): Calculated for  $\text{C}_{21}\text{H}_{13}\text{F}_6\text{N}_3\text{O}_2\text{S}$ :  $[\text{M}+\text{H}]^+$  486.0706, Found 486.0722.

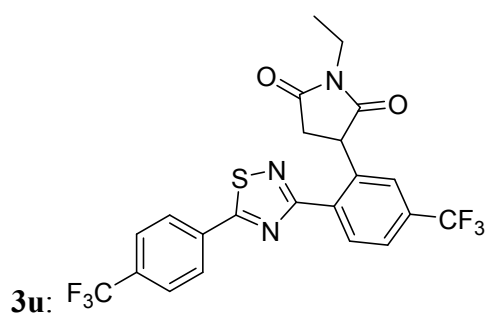

White solid;  $^1\text{H}$  NMR (500 MHz,  $\text{CDCl}_3$ )  $\delta$  8.51 (d,  $J = 8.2$  Hz, 1H), 8.13 (d,  $J = 8.1$  Hz, 2H), 7.82 (d,  $J = 8.2$  Hz, 2H), 7.75 (d,  $J = 8.2$  Hz, 1H), 7.51 (s, 1H), 5.07-4.02 (m, 1H), 3.66-3.62 (m, 1H), 3.58 (q,  $J = 7.2$  Hz, 2H), 3.41-3.33 (m, 1H), 2.92-2.85 (m, 1H), 1.24 ppm (t,  $J = 7.2$  Hz, 3H).  $^{13}\text{C}$  NMR (126 MHz,  $\text{CDCl}_3$ )  $\delta$  186.64, 177.34, 175.72, 172.43, 137.35, 134.81, 134.00 (q,  $J = 32.9$  Hz), 133.03, 132.94, 132.67 (q,  $J = 32.9$  Hz), 127.97, 126.84, 126.56 (q,  $J = 3.7$  Hz), 125.07 (q,  $J = 3.6$  Hz), 123.49 (q,  $J = 272.7$  Hz), 45.39, 38.01, 34.16, 13.06 ppm. HRMS (ESI): Calculated for  $\text{C}_{22}\text{H}_{15}\text{F}_6\text{N}_3\text{O}_2\text{S}$ :  $[\text{M}+\text{H}]^+$  500.0862, Found 500.0879.

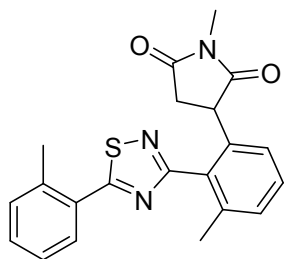

**3w:**

White solid;  $^1\text{H}$  NMR (500 MHz,  $\text{CDCl}_3$ )  $\delta$  8.07 (d,  $J = 7.6$  Hz, 1H), 7.44 (t,  $J = 7.0$  Hz, 1H), 7.39-7.34 (m, 3H), 7.29 (d,  $J = 7.6$  Hz, 1H), 7.09 (d,  $J = 7.7$  Hz, 1H), 4.10-4.04 (m, 1H), 3.06-2.98 (m, 1H), 2.92 (s, 3H), 2.82-2.75 (m, 1H), 2.67 (s, 3H), 2.26 ppm (s, 3H).  $^{13}\text{C}$  NMR (126 MHz,  $\text{CDCl}_3$ )  $\delta$  187.42, 177.80, 176.19, 172.01, 138.92, 137.21, 136.91, 133.38, 131.91, 131.53, 130.15, 129.94, 129.90, 129.72, 126.70, 125.99, 45.04, 38.25, 25.08, 22.16, 20.73 ppm. HRMS (ESI): Calculated for  $\text{C}_{21}\text{H}_{19}\text{N}_3\text{O}_2\text{S}$ :  $[\text{M}+\text{H}]^+$  378.1271, Found 378.1276.

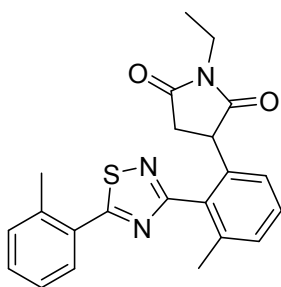

**3x:**

White solid;  $^1\text{H}$  NMR (500 MHz,  $\text{CDCl}_3$ )  $\delta$  8.09 (d,  $J = 7.7$  Hz, 1H), 7.45 (t,  $J = 7.1$  Hz, 1H), 7.39-7.34 (m, 3H), 7.29 (d,  $J = 7.6$  Hz, 1H), 7.06 (d,  $J = 7.7$  Hz, 1H), 4.06-4.02 (m, 1H), 3.52 (q,  $J = 7.2$  Hz, 2H), 3.04-2.96 (m, 1H), 2.77-2.70 (m, 1H), 2.67 (s, 3H), 2.26 (s, 3H), 1.16 ppm (t,  $J = 7.2$  Hz, 3H).  $^{13}\text{C}$  NMR (126 MHz,  $\text{CDCl}_3$ )  $\delta$  187.40, 177.58, 176.04, 172.01, 138.84, 137.25, 137.21, 134.13, 133.55, 131.92, 131.51, 130.06, 129.99, 129.87, 129.75, 126.70, 125.34, 44.67, 38.40, 33.96, 22.19, 20.74, 13.11 ppm. HRMS (ESI): Calculated for  $\text{C}_{22}\text{H}_{21}\text{N}_3\text{O}_2\text{S}$ :  $[\text{M}+\text{H}]^+$  392.1425, Found 392.1441.

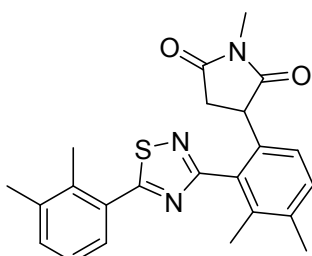

**3y:**

White solid;  $^1\text{H}$  NMR (500 MHz,  $\text{CDCl}_3$ )  $\delta$  7.70 (d,  $J = 7.7$  Hz, 1H), 7.34 (d,  $J = 7.5$  Hz, 1H), 7.27-7.22 (m, 2H), 6.99 (d,  $J = 7.9$  Hz, 1H), 3.99-3.90 (m, 1H), 3.00-2.92 (m, 1H), 2.92 (s, 3H), 2.78-2.71 (m, 1H), 2.52 (s, 3H), 2.40 (s, 3H), 2.33 ppm (s, 3H).  $^{13}\text{C}$  NMR (126 MHz,  $\text{CDCl}_3$ )  $\delta$  188.64, 177.86, 176.26, 172.76, 138.46, 137.22, 137.16, 135.60, 134.42, 133.56, 132.96, 131.40, 130.06, 128.27, 126.09, 125.61, 44.98, 38.16, 25.07, 20.86, 20.33, 17.25, 17.13 ppm. HRMS (ESI): Calculated for  $\text{C}_{23}\text{H}_{23}\text{N}_3\text{O}_2\text{S}$ :  $[\text{M}+\text{H}]^+$  406.1584, Found 406.1589.

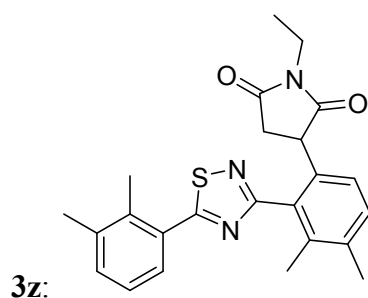

White solid;  $^1\text{H}$  NMR (500 MHz,  $\text{CDCl}_3$ )  $\delta$  7.71 (d,  $J = 7.7$  Hz, 1H), 7.34 (d,  $J = 7.5$  Hz, 1H), 7.27-7.24 (m, 2H), 6.96 (d,  $J = 7.9$  Hz, 1H), 3.96-3.86 (m, 1H), 3.52 (q,  $J = 7.2$  Hz, 2H), 2.98-2.90 (m, 1H), 2.73-2.66 (m, 1H), 2.53 (s, 3H), 2.40 (s, 3H), 2.33 (s, 3H), 2.08 (s, 3H), 1.16 ppm (t,  $J = 7.4$  Hz, 3H).  $^{13}\text{C}$  NMR (126 MHz,  $\text{CDCl}_3$ )  $\delta$  188.62, 177.63, 176.10, 172.78, 138.46, 137.11, 137.05, 135.59, 134.78, 134.13, 133.73, 132.94, 131.45, 130.09, 128.25, 126.08, 124.94, 44.59, 38.31, 33.94, 20.87, 20.32, 17.26, 17.14, 13.12 ppm. HRMS (ESI): Calculated for  $\text{C}_{24}\text{H}_{25}\text{N}_3\text{O}_2\text{S}$ :  $[\text{M}+\text{H}]^+$  420.1740, Found 420.1756.

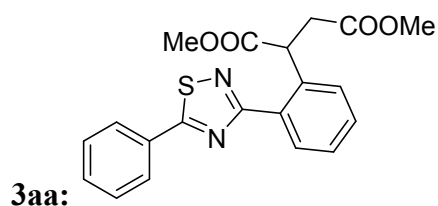

White solid;  $^1\text{H}$  NMR (500 MHz,  $\text{CDCl}_3$ )  $\delta$  8.21 (d,  $J = 7.4$  Hz, 1H), 8.08-7.95 (m, 2H), 7.55-7.49 (m, 3H), 7.47-7.36 (m, 3H), 5.35- 5.28 (m, 1H), 3.68 (s, 3H), 3.64 (s, 3H), 3.26-3.19 (m, 1H), 3.00-2.94 ppm (m, 1H).  $^{13}\text{C}$  NMR (126 MHz,  $\text{CDCl}_3$ )  $\delta$  187.92, 174.00, 173.48, 172.37, 137.33, 132.07, 131.84, 131.67, 130.52, 130.46, 129.33, 128.37, 127.67, 127.56, 52.27, 51.80, 44.23, 38.14 ppm. HRMS (ESI): Calculated for  $\text{C}_{20}\text{H}_{18}\text{N}_2\text{O}_4\text{S}$ :  $[\text{M}+\text{H}]^+$  383.1060, Found 383.1041.

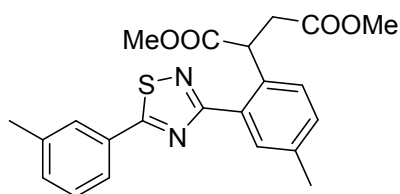

**3ab:**

White solid;  $^1\text{H}$  NMR (500 MHz,  $\text{CDCl}_3$ )  $\delta$  8.01 (s, 1H), 7.85 (s, 1H), 7.79 (d,  $J = 7.5$  Hz, 1H), 7.41-7.32 (m, 2H), 5.28-5.23 (m, 1H), 3.67 (s, 3H), 3.623 (s, 3H), 3.24-3.17 (m, 1H), 2.98-2.92 (m, 1H), 2.45 (s, 3H), 2.41 ppm (s, 3H).  $^{13}\text{C}$  NMR (126 MHz,  $\text{CDCl}_3$ )  $\delta$  188.08, 174.17, 173.57, 172.44, 139.22, 137.42, 134.39, 132.85, 132.07, 131.65, 131.25, 130.44, 129.19, 128.31, 128.05, 124.78, 52.21, 51.75, 43.89, 38.18, 21.31, 21.00 ppm. HRMS (ESI): Calculated for  $\text{C}_{22}\text{H}_{22}\text{N}_2\text{O}_4\text{S}$ :  $[\text{M}+\text{H}]^+$  411.1373, Found 411.1352.

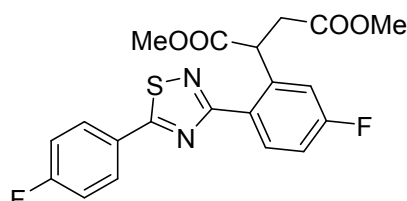

**3ac:**

White solid;  $^1\text{H}$  NMR (500 MHz,  $\text{CDCl}_3$ )  $\delta$  8.28-8.20 (m, 1H), 8.08-7.96 (m, 2H), 7.21 (t,  $J = 8.5$  Hz, 2H), 7.15-7.04 (m, 2H), 5.38-5.33 (m, 1H), 3.69 (s, 3H), 3.66 (s, 3H) 3.24-3.17 (m, 1H), 2.97-2.90 ppm (m, 1H).  $^{13}\text{C}$  NMR (126 MHz,  $\text{CDCl}_3$ )  $\delta$  186.72, 173.44, 172.58, 172.10, 164.99 (d,  $J = 253.8$  Hz), 163.65 (d,  $J = 251.4$  Hz), 139.95 (d,  $J = 7.7$  Hz), 133.86 (d,  $J = 8.7$  Hz), 129.75 (d,  $J = 8.9$  Hz), 127.95, 126.85, 116.61 (d,  $J = 22.3$  Hz), 115.44 (d,  $J = 22.6$  Hz), 114.89 (d,  $J = 21.3$  Hz), 52.45, 51.90, 44.19, 37.90 ppm. HRMS (ESI): Calculated for  $\text{C}_{20}\text{H}_{16}\text{F}_2\text{N}_4\text{O}_2\text{S}$ :  $[\text{M}+\text{H}]^+$  419.0872, Found 419.0855.

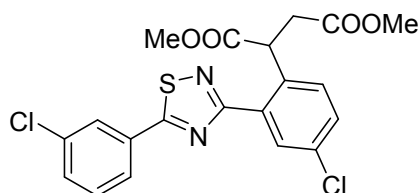

**3ad:**

White solid;  $^1\text{H}$  NMR (500 MHz,  $\text{CDCl}_3$ )  $\delta$  8.16 (s, 1H), 7.97 (s, 1H), 7.80 (d,  $J = 7.7$  Hz, 1H), 7.45 (d,  $J = 8.0$  Hz, 1H), 7.39 (t,  $J = 7.9$  Hz, 1H), 7.35 (d,  $J = 8.4$  Hz, 1H), 7.26 (d,  $J = 8.4$  Hz, 1H), 5.22-5.17 (m, 1H), 3.62 (s, 3H), 3.57 (s, 3H), 3.17-3.09 (m, 1H), 2.88-2.82 ppm (m, 1H).  $^{13}\text{C}$  NMR (126 MHz,  $\text{CDCl}_3$ )  $\delta$  186.72, 173.56, 172.27,

172.10, 135.82, 135.55, 133.64, 132.97, 132.14, 131.82, 131.52, 130.67, 130.58, 130.01, 127.37, 125.82, 52.40, 51.95, 43.79, 37.90 ppm. HRMS (ESI): Calculated for  $C_{20}H_{16}Cl_2N_4O_2S$ :  $[M+H]^+$  451.0281, Found 451.0267.

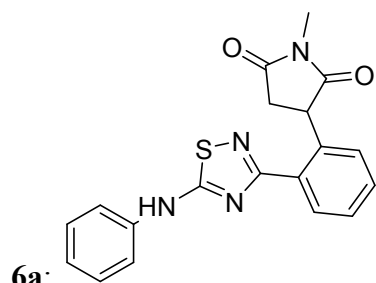

White solid;  $^1H$  NMR (500 MHz,  $DMSO-d_6$ )  $\delta$  11.06 (s, 1H), 8.04-8.01 (m, 1H), 7.61 (d,  $J = 7.9$  Hz, 2H), 7.52-7.34 (m, 5H), 7.10 (t,  $J = 7.3$  Hz, 1H), 4.95-4.78 (m, 1H), 3.23-3.16 (m, 1H), 2.85 (s, 3H), 2.75-2.69 ppm (m, 1H).  $^{13}C$  NMR (126 MHz,  $DMSO-d_6$ )  $\delta$  178.92, 178.72, 176.77, 169.36, 140.19, 137.15, 132.85, 131.41, 130.54, 129.86, 128.16, 123.52, 118.25, 45.32, 38.26, 25.18 ppm. HRMS (ESI): Calculated for  $C_{19}H_{16}N_4O_2S$ :  $[M+H]^+$  365.1067, Found 365.1046.

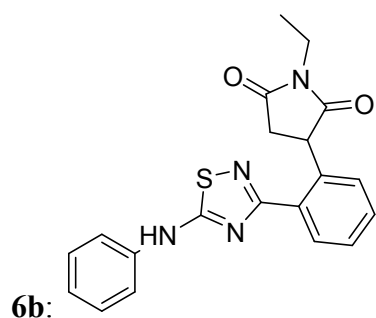

White solid;  $^1H$  NMR (500 MHz,  $CDCl_3$ )  $\delta$  9.13 (s, 1H), 8.02 (d,  $J = 7.8$  Hz, 1H), 7.40-7.35 (m, 1H), 7.34-7.27 (m, 3H), 7.18 (d,  $J = 7.7$  Hz, 1H), 7.15-7.08 (m, 3H), 4.97-4.81 (m, 1H), 3.68-3.58 (m, 2H), 3.31-3.24 (m, 1H), 2.87-2.81 (m, 1H), 1.24 ppm (t,  $J = 7.2$  Hz, 3H).  $^{13}C$  NMR (126 MHz,  $CDCl_3$ )  $\delta$  180.21, 178.64, 176.83, 168.82, 139.04, 136.28, 132.22, 131.55, 130.41, 129.75, 129.69, 127.98, 124.31, 118.51, 45.35, 38.39, 34.02, 13.15 ppm. HRMS (ESI): Calculated for  $C_{20}H_{18}N_4O_2S$ :  $[M+H]^+$  379.1223, Found 379.1202.



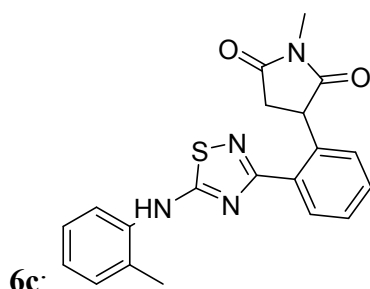

White solid;  $^1\text{H}$  NMR (500 MHz,  $\text{CDCl}_3$ )  $\delta$  8.41 (s, 1H), 8.01 (d,  $J = 7.8$  Hz, 1H), 7.41 (d,  $J = 7.8$  Hz, 1H), 7.36 (t,  $J = 7.6$  Hz, 1H), 7.29 (t,  $J = 7.7$  Hz, 1H), 7.26-7.22 (m, 2H), 7.22-7.14 (m, 2H), 4.86-4.79 (m, 1H), 3.30-3.22 (m, 1H), 3.04 (s, 3H), 2.89-2.83 (m, 1H), 2.29 ppm (s, 3H).  $^{13}\text{C}$  NMR (126 MHz,  $\text{CDCl}_3$ )  $\delta$  182.22, 178.68, 177.13, 169.00, 137.58, 135.99, 131.97, 131.53, 131.41, 130.62, 130.31, 127.95, 127.56, 126.25, 120.81, 45.71, 38.36, 25.16, 17.66 ppm. HRMS (ESI): Calculated for  $\text{C}_{20}\text{H}_{18}\text{N}_4\text{O}_2\text{S}$ :  $[\text{M}+\text{H}]^+$  379.1223, Found 379.1212.

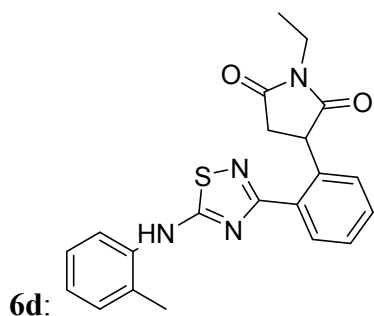

White solid;  $^1\text{H}$  NMR (500 MHz,  $\text{CDCl}_3$ )  $\delta$  8.45 (s, 1H), 8.00 (d,  $J = 7.8$  Hz, 1H), 7.42 (d,  $J = 7.9$  Hz, 1H), 7.37-7.35 (m, 1H), 7.31-7.27 (m, 1H), 7.25-7.20 (m, 2H), 7.18-7.13 (m, 2H), 4.96-4.78 (m, 1H), 3.68-3.55 (m, 2H), 3.28-3.21 (m, 1H), 2.83-2.76 (m, 1H), 2.27 (s, 3H), 1.23 ppm (t,  $J = 7.1$  Hz, 3H).  $^{13}\text{C}$  NMR (126 MHz,  $\text{CDCl}_3$ )  $\delta$  182.23, 178.44, 176.80, 169.06, 137.63, 136.24, 132.08, 131.51, 131.40, 130.68, 130.31, 129.86, 127.85, 127.54, 126.25, 120.96, 45.42, 38.36, 33.95, 17.64, 13.14 ppm. HRMS (ESI): Calculated for  $\text{C}_{21}\text{H}_{20}\text{N}_4\text{O}_2\text{S}$ :  $[\text{M}+\text{H}]^+$  393.1380, Found 393.1361.

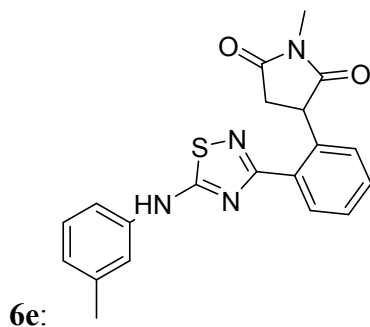

White solid;  $^1\text{H}$  NMR (500 MHz,  $\text{CDCl}_3$ )  $\delta$  9.15 (s, 1H), 8.03 (d,  $J = 7.7$  Hz, 1H), 7.39 (t,  $J = 7.5$  Hz, 1H), 7.29 (t,  $J = 7.6$  Hz, 1H), 7.23-7.18 (m, 2H), 6.96-6.91 (m, 2H), 6.88 (s, 1H), 4.87-4.75 (m, 1H), 3.32-3.25 (m, 1H), 3.05 (s, 3H), 2.94-2.87 (m, 1H), 2.29 ppm (s, 3H).  $^{13}\text{C}$  NMR (126 MHz,  $\text{CDCl}_3$ )  $\delta$  180.52, 178.74, 177.10, 168.74, 139.87, 138.97, 136.06, 132.11, 131.54, 130.33, 130.25, 129.52, 128.04, 125.34, 119.47, 115.47, 45.68, 38.41, 25.20, 21.47 ppm. HRMS (ESI): Calculated for  $\text{C}_{20}\text{H}_{18}\text{N}_4\text{O}_2\text{S}$ :  $[\text{M}+\text{H}]^+$  379.1223, Found 379.1202.

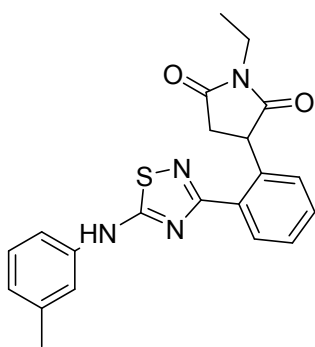

White solid;  $^1\text{H}$  NMR (500 MHz,  $\text{CDCl}_3$ )  $\delta$  8.98 (s, 1H), 8.04 (d,  $J = 7.8$  Hz, 1H), 7.38 (t,  $J = 7.6$  Hz, 1H), 7.31 (t,  $J = 7.6$  Hz, 1H), 7.25-7.18 (m, 2H), 6.99-6.91 (m, 2H), 6.90 (s, 1H), 4.96-4.82 (m, 1H), 3.68-3.58 (m, 2H), 3.31-3.24 (m, 1H), 2.88-2.81 (m, 1H), 2.31 (s, 3H), 1.24 ppm (t,  $J = 7.2$  Hz, 3H).  $^{13}\text{C}$  NMR (126 MHz,  $\text{CDCl}_3$ )  $\delta$  180.42, 178.50, 176.82, 168.74, 139.90, 138.96, 136.31, 132.17, 131.54, 130.39, 129.81, 129.57, 127.98, 125.37, 119.44, 115.49, 45.38, 38.41, 33.99, 21.49, 13.15 ppm. HRMS (ESI): Calculated for  $\text{C}_{21}\text{H}_{20}\text{N}_4\text{O}_2\text{S}$ :  $[\text{M}+\text{H}]^+$  393.1380, Found 393.1361.

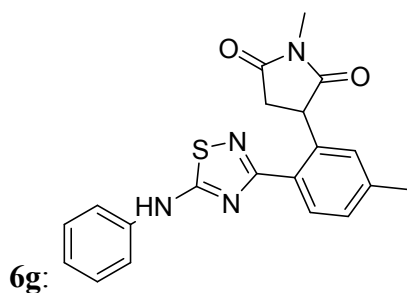

White solid;  $^1\text{H}$  NMR (500 MHz,  $\text{DMSO}-d_6$ )  $\delta$  11.04 (s, 1H), 7.94 (d,  $J = 7.9$  Hz, 1H), 7.60 (d,  $J = 7.9$  Hz, 2H), 7.41 (t,  $J = 7.9$  Hz, 2H), 7.28 (d,  $J = 7.9$  Hz, 1H), 7.09 (t,  $J = 7.4$  Hz, 1H), 4.93-4.80 (m, 1H), 3.22-3.14 (m, 1H), 2.86 (s, 3H), 2.74-2.68 (m, 1H), 2.35 ppm (s, 3H).  $^{13}\text{C}$  NMR (126 MHz,  $\text{DMSO}-d_6$ )  $\delta$  178.77, 176.83, 169.40, 140.28, 140.23, 137.02, 131.91, 131.46, 130.09, 129.85, 128.77, 123.47, 118.21, 45.25, 38.23,

25.18, 21.23 ppm. HRMS (ESI): Calculated for C<sub>20</sub>H<sub>18</sub>N<sub>4</sub>O<sub>2</sub>S: [M+H]<sup>+</sup> 379.1223, Found 379.1202.

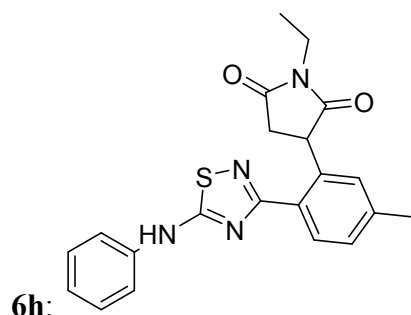

White solid; <sup>1</sup>H NMR (500 MHz, CDCl<sub>3</sub>) δ 9.12 (s, 1H), 7.92 (d, *J* = 8.0 Hz, 1H), 7.33-7.29 (m, 2H), 7.14-7.04 (m, 4H), 6.96 (s, 1H), 4.95-4.85 (m, 1H), 3.70 – 3.60 (m, 2H), 3.30-3.23 (m, 1H), 2.86-2.80 (m, 1H), 2.31 (s, 3H), 1.25 ppm (t, *J* = 7.2 Hz, 3H). <sup>13</sup>C NMR (126 MHz, CDCl<sub>3</sub>) δ 179.99, 178.82, 176.94, 168.83, 140.61, 139.09, 136.07, 131.56, 130.47, 129.62, 129.42, 128.75, 124.18, 118.49, 45.35, 38.37, 34.01, 21.28, 13.15 ppm. HRMS (ESI): Calculated for C<sub>21</sub>H<sub>20</sub>N<sub>4</sub>O<sub>2</sub>S: [M+H]<sup>+</sup> 393.1380, Found 393.1361.

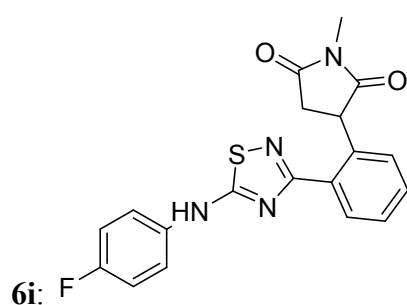

White solid; <sup>1</sup>H NMR (500 MHz, CDCl<sub>3</sub>) δ 9.14 (s, 1H), 7.90 (d, *J* = 7.6 Hz, 1H), 7.31 (t, *J* = 7.3 Hz, 1H), 7.25-7.18 (m, 2H), 7.14 (d, *J* = 7.5 Hz, 1H), 7.09-7.02 (m, 2H), 6.93 (t, *J* = 7.8 Hz, 2H), 4.82-4.63 (m, 1H), 3.24-3.16 (m, 1H), 2.97 (s, 3H), 2.88-2.81 ppm (m, 1H). <sup>13</sup>C NMR (126 MHz, CDCl<sub>3</sub>) δ 180.90, 178.90, 176.98, 168.79, 159.58 (d, *J* = 245.0 Hz), 135.96, 135.17 (d, *J* = 2.8 Hz), 135.56 (d, *J* = 100.6 Hz), 131.94, 131.51, 130.47, 130.28, 128.08, 121.08 (d, *J* = 8.2 Hz), 116.44 (d, *J* = 22.8 Hz), 45.62, 38.33, 25.23 ppm. HRMS (ESI): Calculated for C<sub>19</sub>H<sub>15</sub>FN<sub>4</sub>O<sub>2</sub>S: [M+H]<sup>+</sup> 383.0973, Found 383.0954.

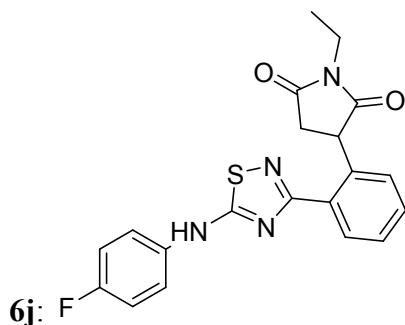

White solid;  $^1\text{H}$  NMR (500 MHz,  $\text{CDCl}_3$ )  $\delta$  9.35 (s, 1H), 7.86 (d,  $J = 7.8$  Hz, 1H), 7.28 (t,  $J = 7.6$  Hz, 1H), 7.16 (t,  $J = 7.6$  Hz, 1H), 7.11 (d,  $J = 7.7$  Hz, 1H), 7.05-7.00 (m, 2H), 6.91-6.86 (m, 2H), 4.86-4.75 (m, 1H), 3.58-3.50 (m, 2H), 3.22-3.15 (m, 1H), 2.82-2.76 (m, 1H), 1.16 ppm (t,  $J = 7.2$  Hz, 3H).  $^{13}\text{C}$  NMR (126 MHz,  $\text{CDCl}_3$ )  $\delta$  180.92, 178.81, 176.73, 168.97, 159.44 (d,  $J = 244.6$  Hz), 136.16, 135.29 (d,  $J = 2.7$  Hz), 132.23, 131.48, 130.41, 129.80, 127.96, 120.96 (d,  $J = 8.2$  Hz), 116.31 (d,  $J = 22.8$  Hz), 45.33, 38.34, 34.06, 13.15 ppm. HRMS (ESI): Calculated for  $\text{C}_{20}\text{H}_{17}\text{FN}_4\text{O}_2\text{S}$ :  $[\text{M}+\text{H}]^+400.0926$ , Found 400.0910.

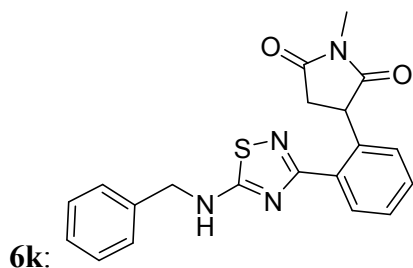

White solid;  $^1\text{H}$  NMR (500 MHz,  $\text{CDCl}_3$ )  $\delta$  7.94 (d,  $J = 7.7$  Hz, 1H), 7.36-7.18 (m, 7H), 7.15-7.00 (m, 2H), 4.80-4.68 (m, 1H), 4.32 (s, 2H), 3.12-3.04 (m, 1H), 2.93 (s, 3H), 2.73-2.66 ppm (m, 1H).  $^{13}\text{C}$  NMR (126 MHz,  $\text{CDCl}_3$ )  $\delta$  183.74, 178.74, 176.97, 169.12, 136.12, 136.07, 132.39, 131.39, 130.25, 129.90, 128.88, 128.11, 127.93, 127.60, 50.23, 45.43, 38.35, 25.11 ppm. HRMS (ESI): Calculated for  $\text{C}_{20}\text{H}_{18}\text{N}_4\text{O}_2\text{S}$ :  $[\text{M}+\text{H}]^+ 379.1223$ , Found 379.1201.

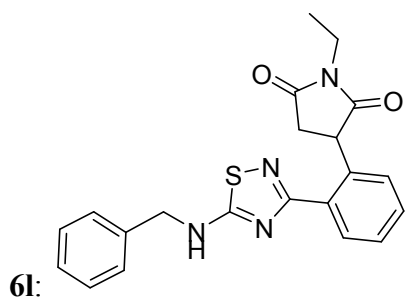

White solid;  $^1\text{H}$  NMR (500 MHz,  $\text{CDCl}_3$ )  $\delta$  7.96 (d,  $J = 7.6$  Hz, 1H), 7.32-7.20 (m, 7H), 7.07 (d,  $J = 7.6$  Hz, 1H), 6.96 (s, 1H), 4.82-4.72 (m, 1H), 4.33 (s, 2H), 3.55-3.48 (m, 2H), 3.11-3.03 (m, 1H), 2.68-2.61 (m, 1H), 1.14 ppm (t,  $J = 7.2$  Hz, 3H).  $^{13}\text{C}$  NMR (126 MHz,  $\text{CDCl}_3$ )  $\delta$  183.65, 178.50, 176.72, 169.14, 136.37, 136.09, 132.45, 131.40, 130.28, 129.51, 128.89, 128.14, 127.87, 127.60, 50.24, 45.19, 38.36, 33.92, 13.14 ppm. HRMS (ESI): Calculated for  $\text{C}_{21}\text{H}_{20}\text{N}_4\text{O}_2\text{S}$ :  $[\text{M}+\text{H}]^+$  93.1380, Found 93.1362.

#### 4. $^1\text{H}$ and $^{13}\text{C}$ NMR spectra of the products

3a:

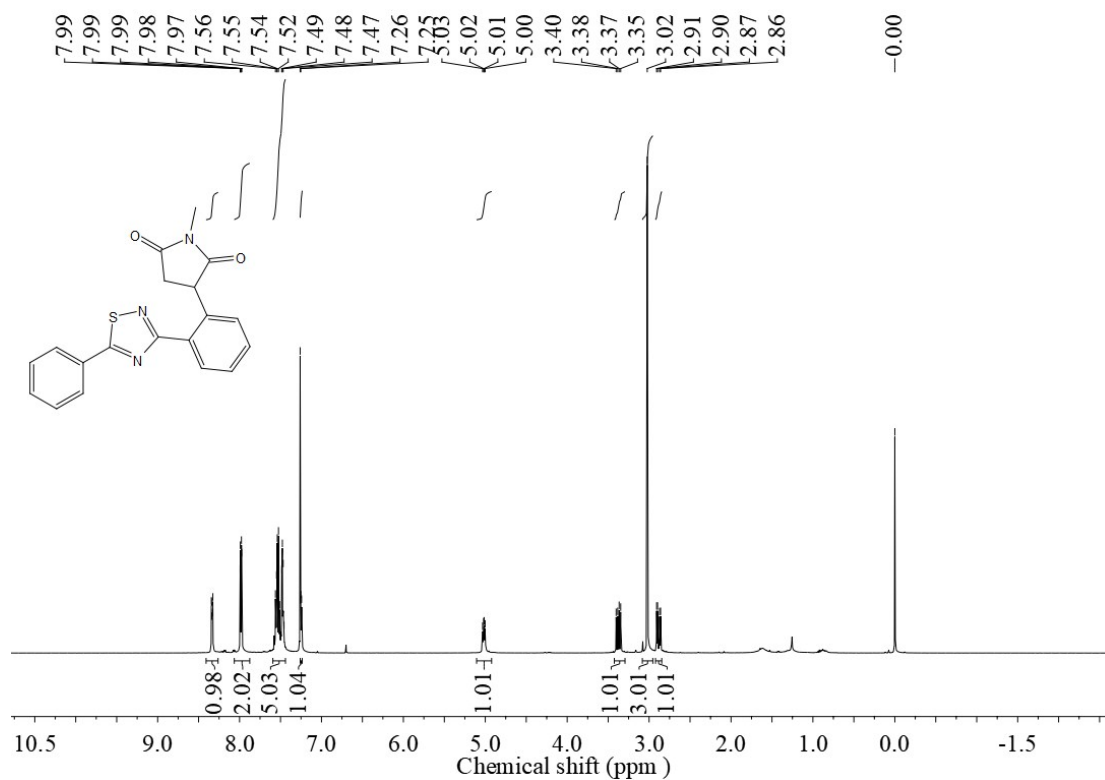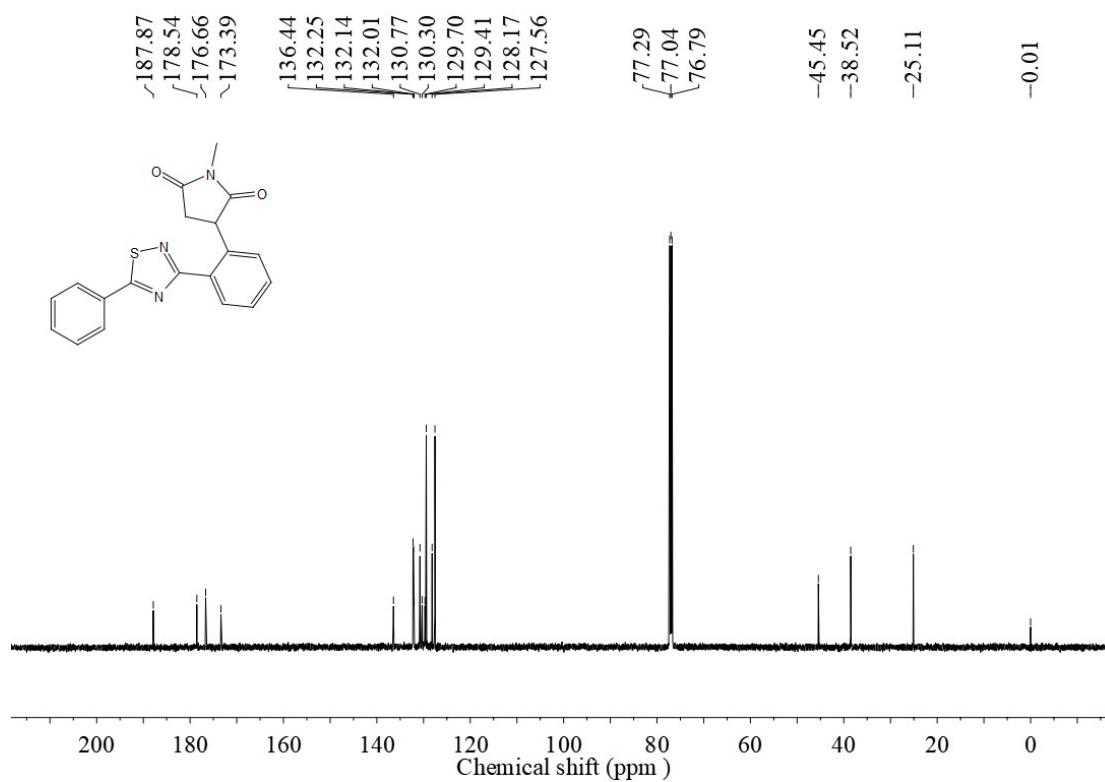

3b:

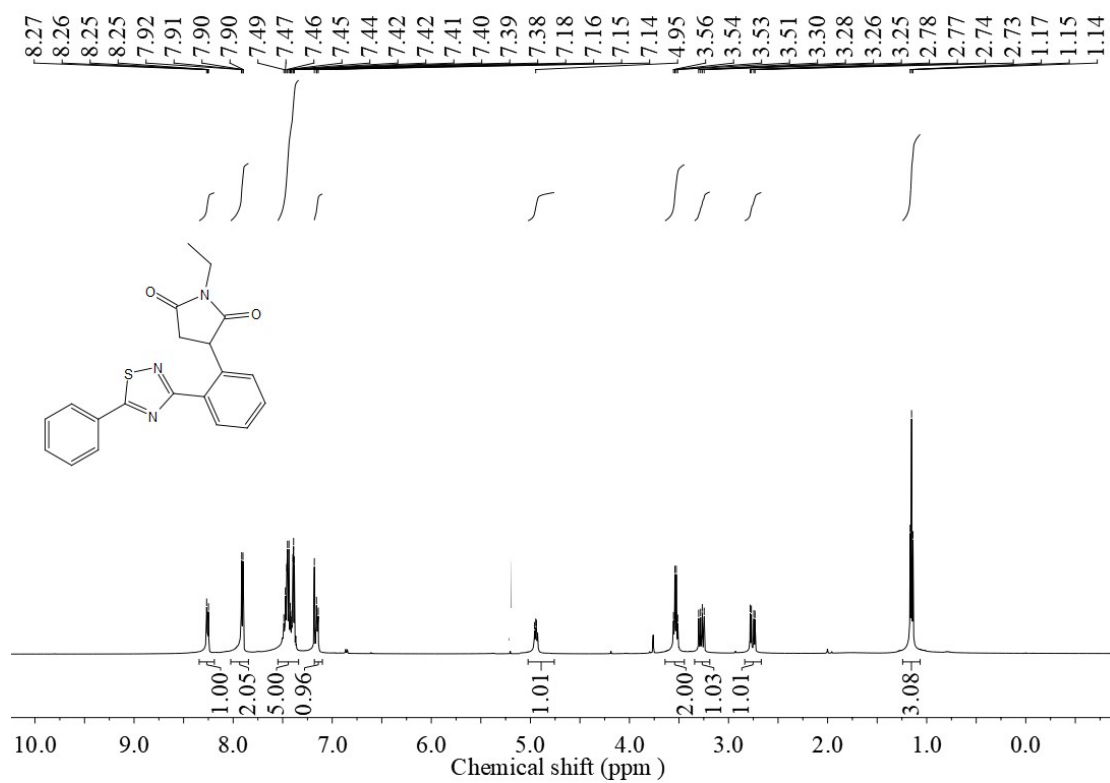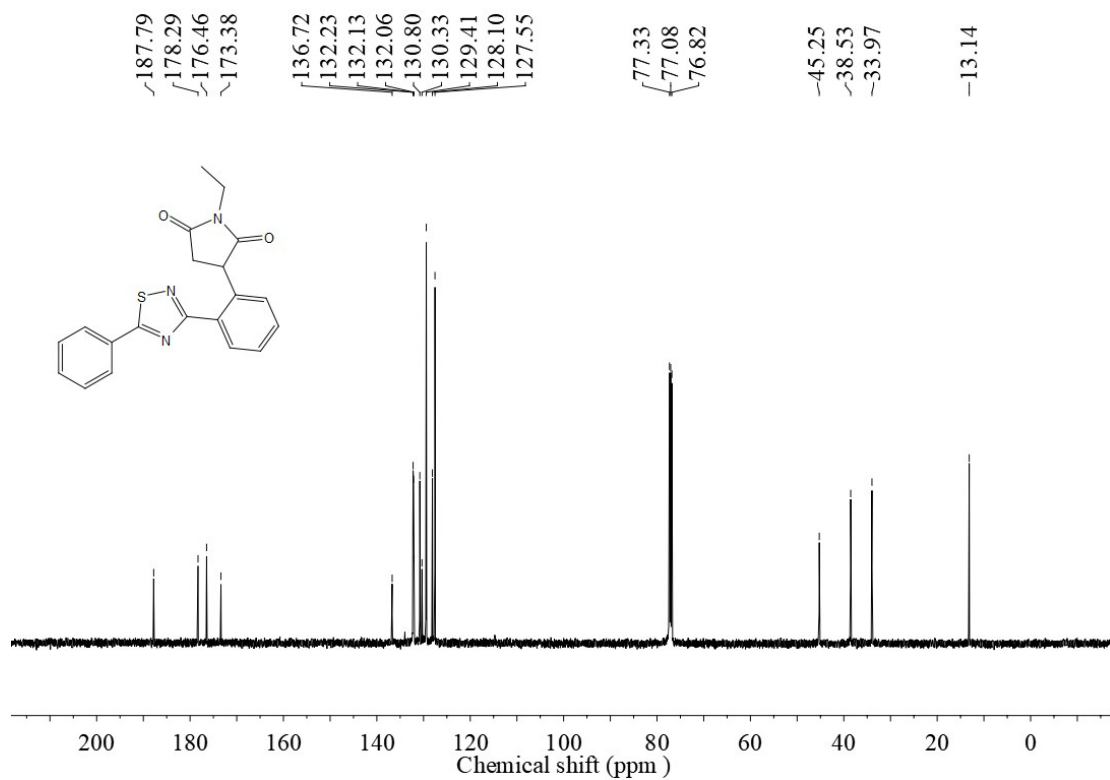

3c:

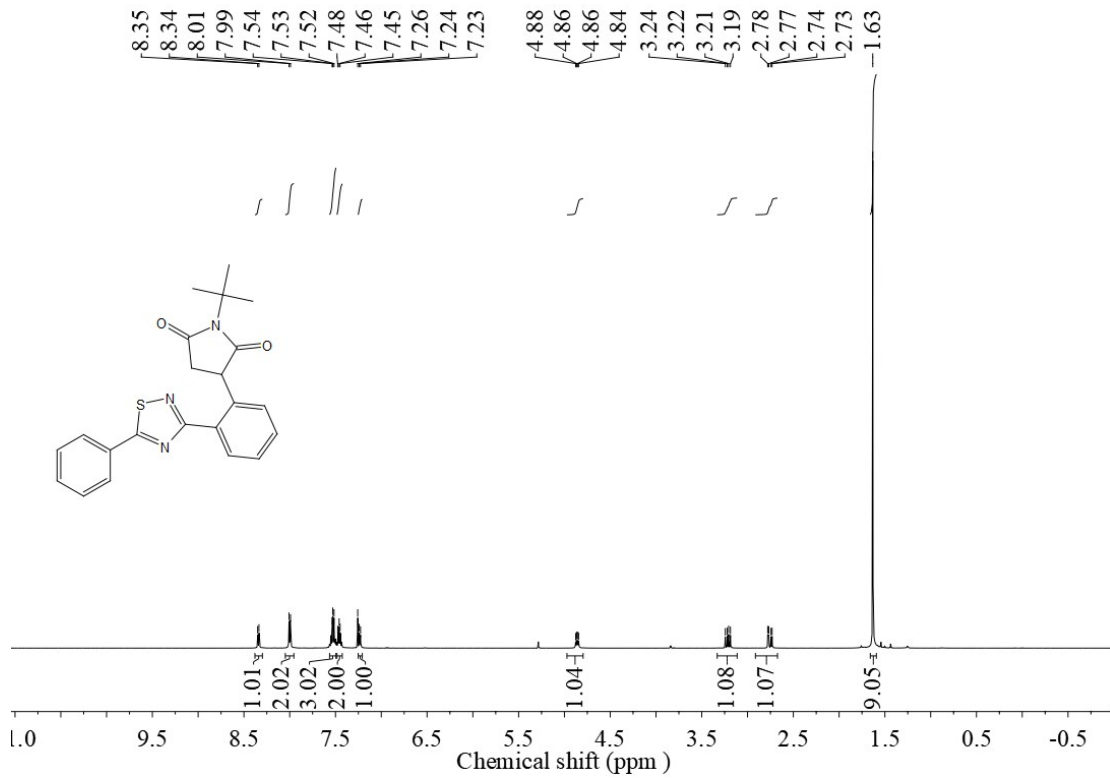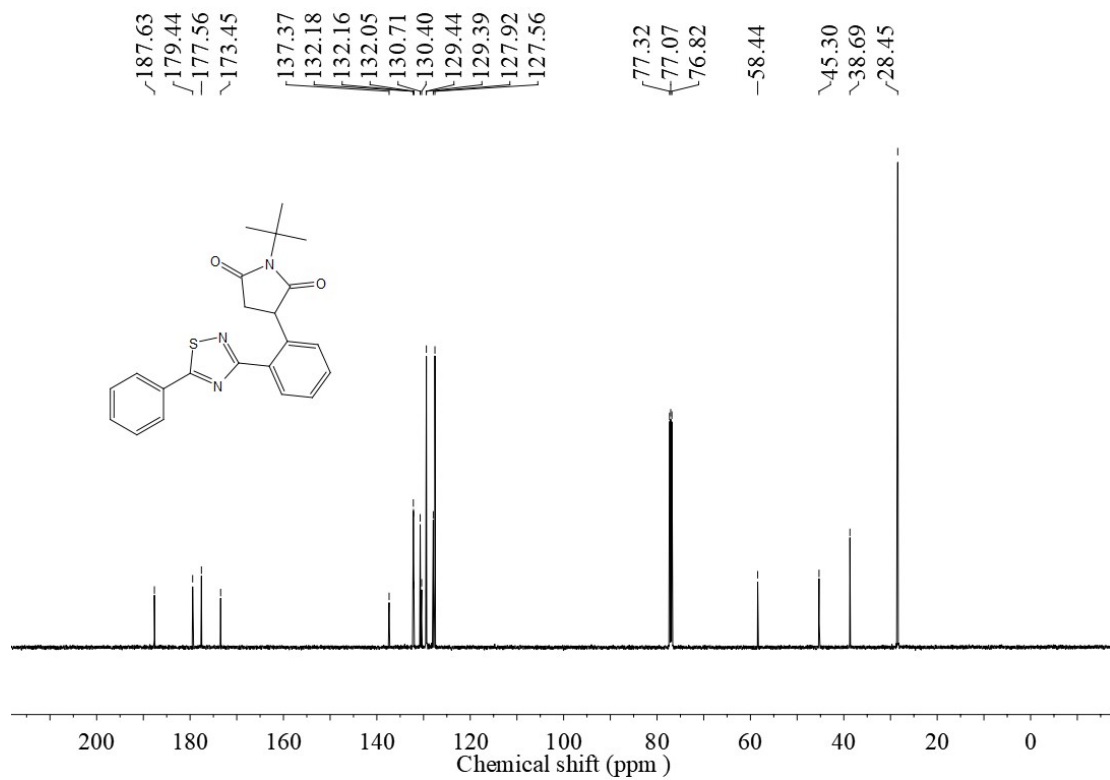

3d:



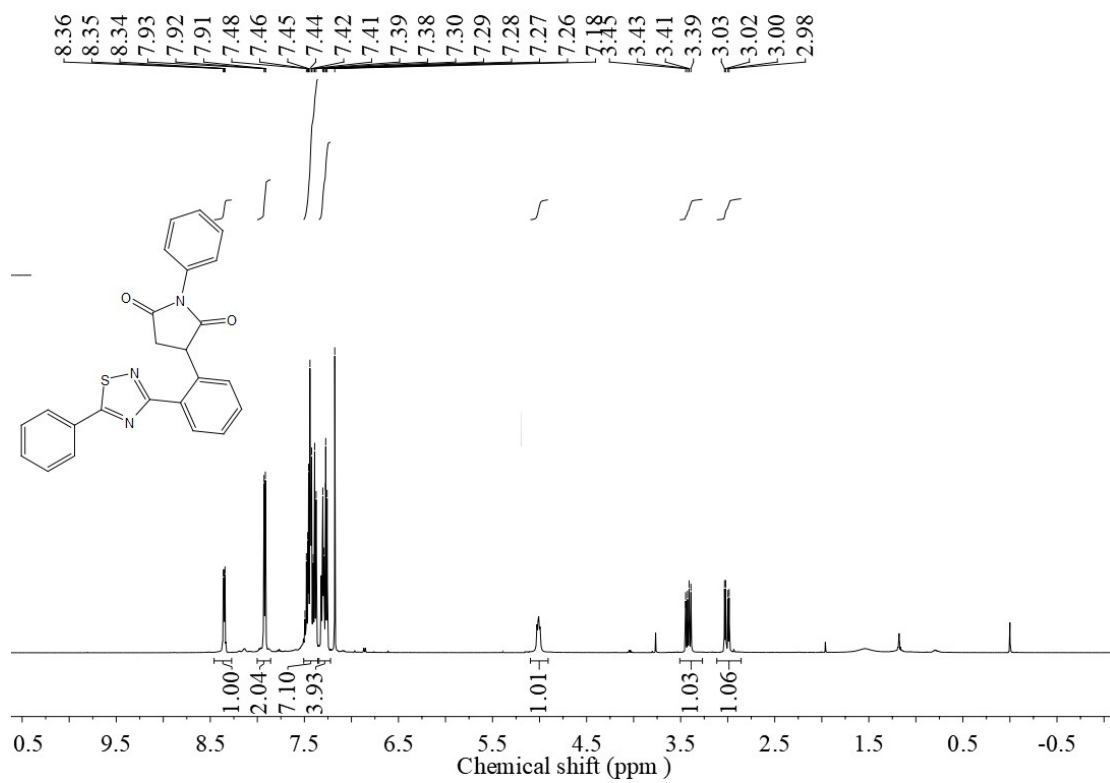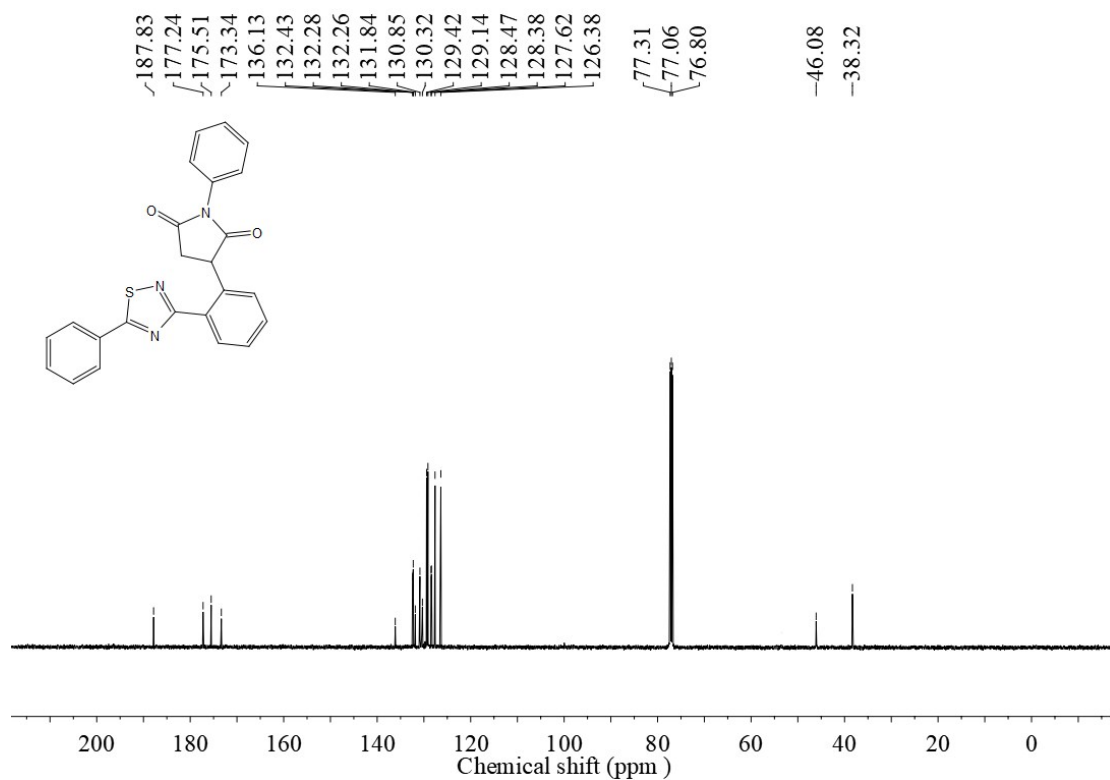

3e:

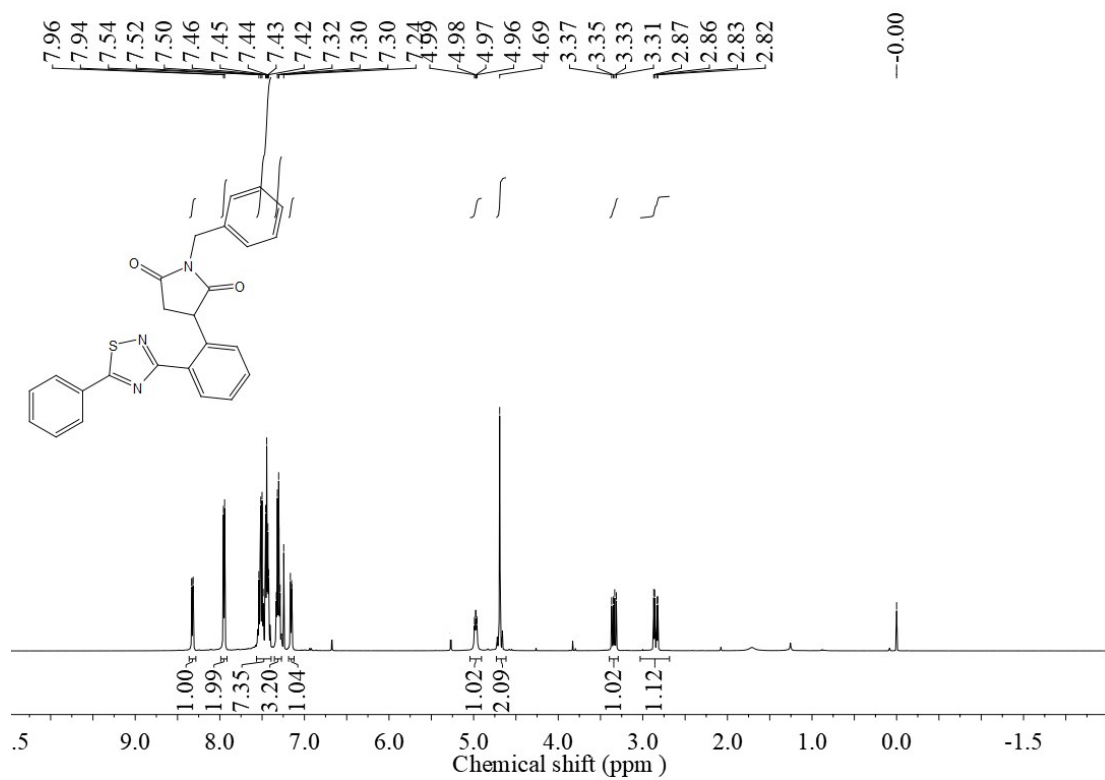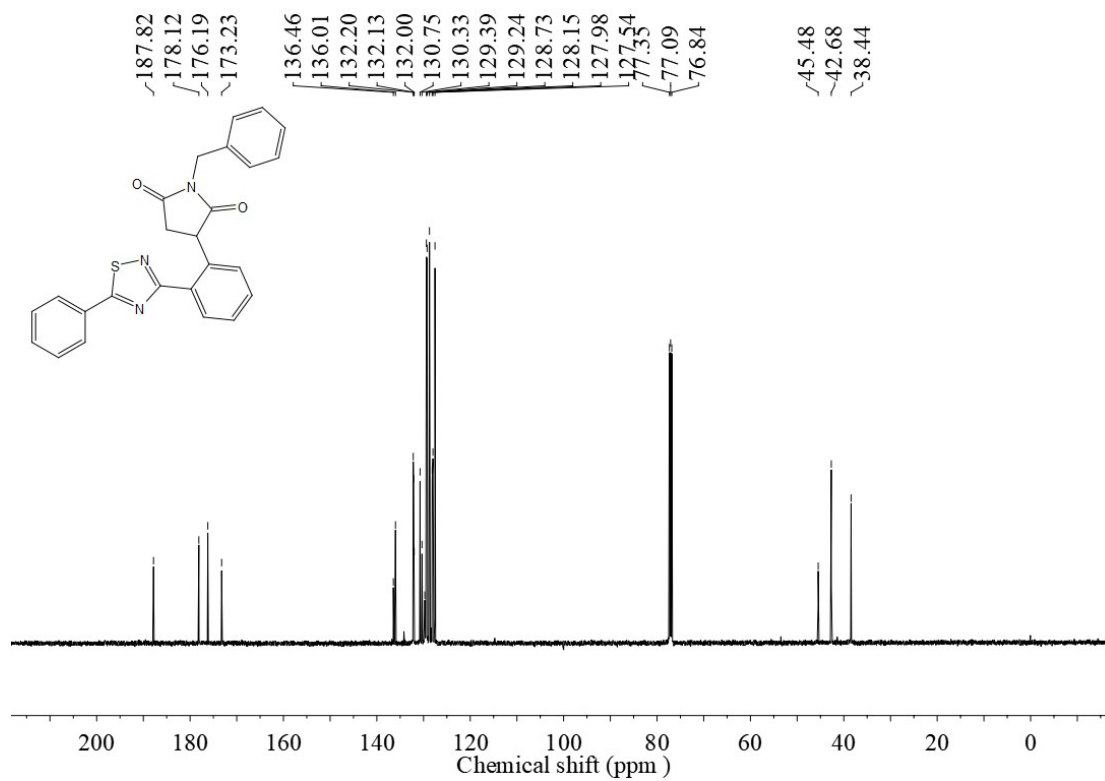

3f:

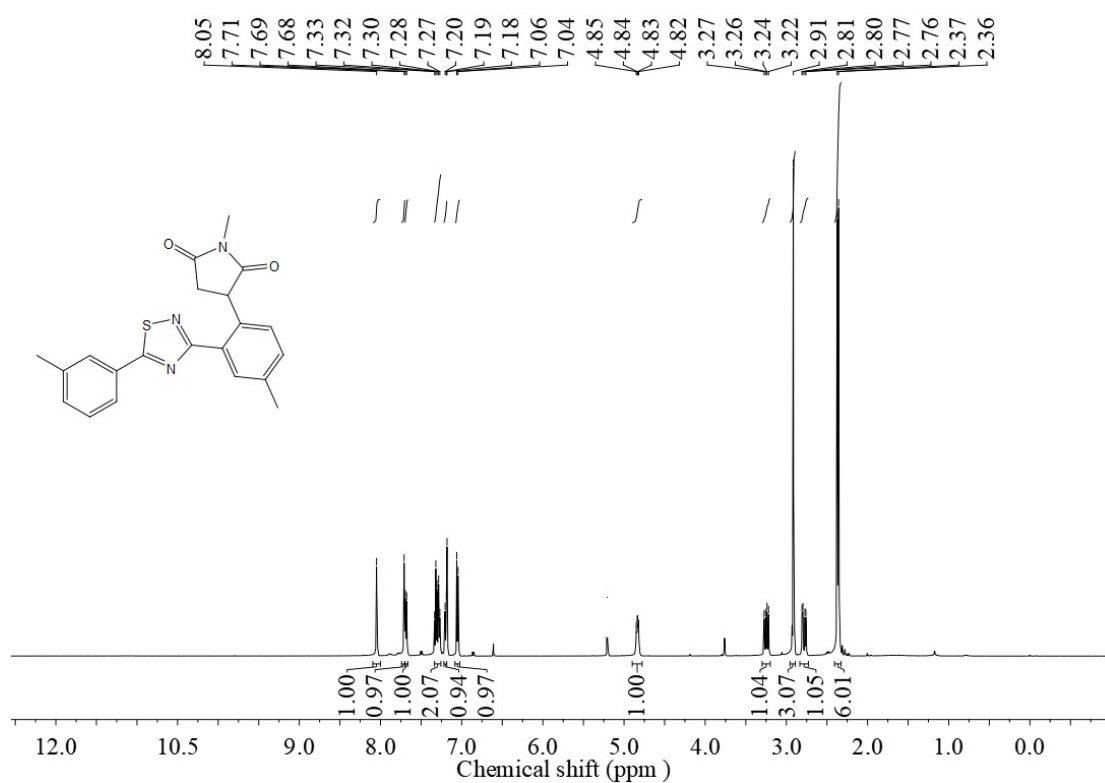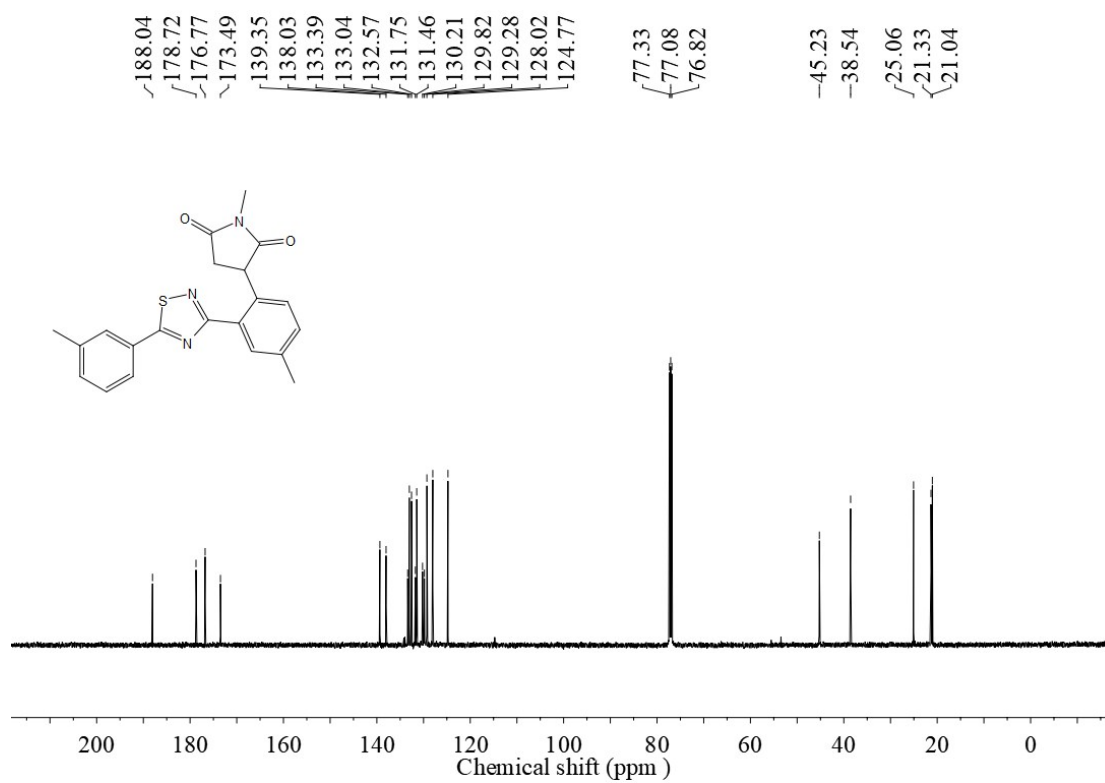

3g:

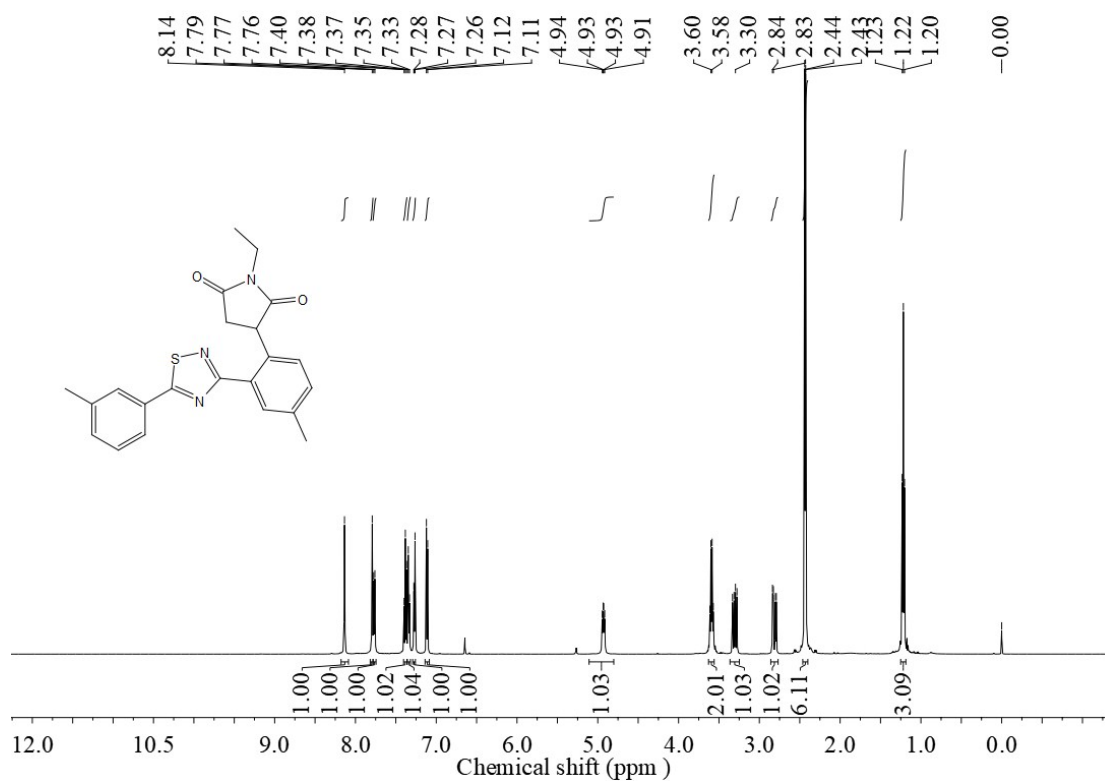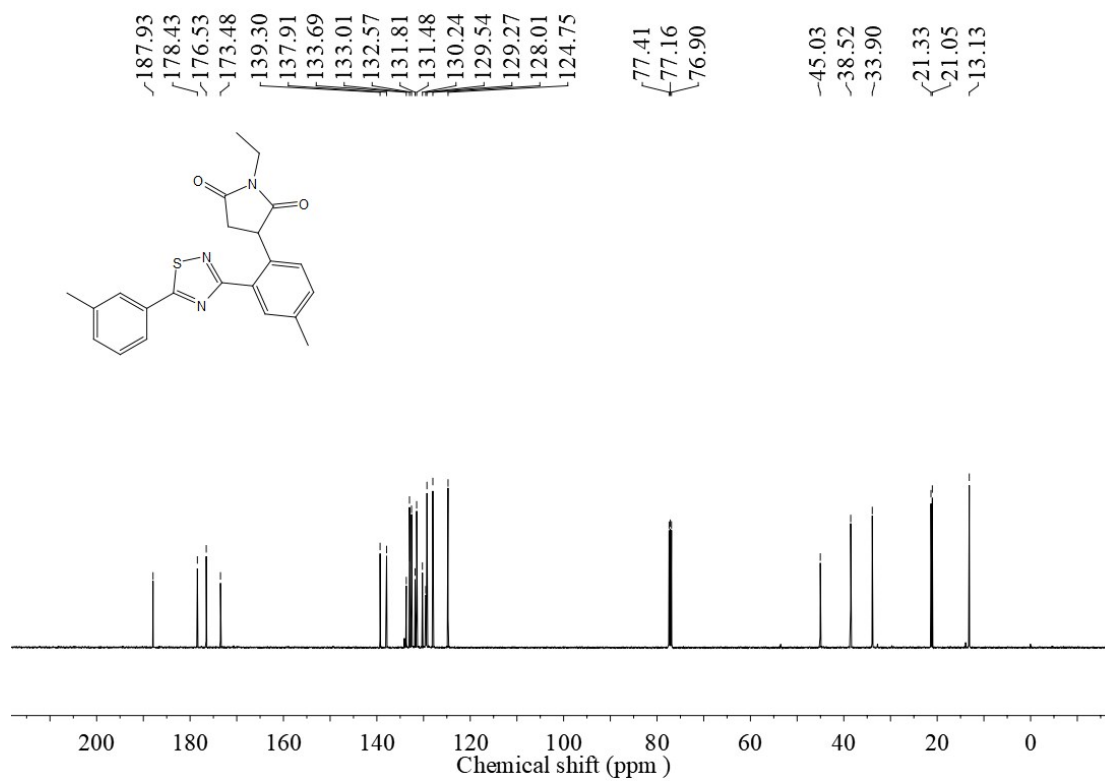

3h:

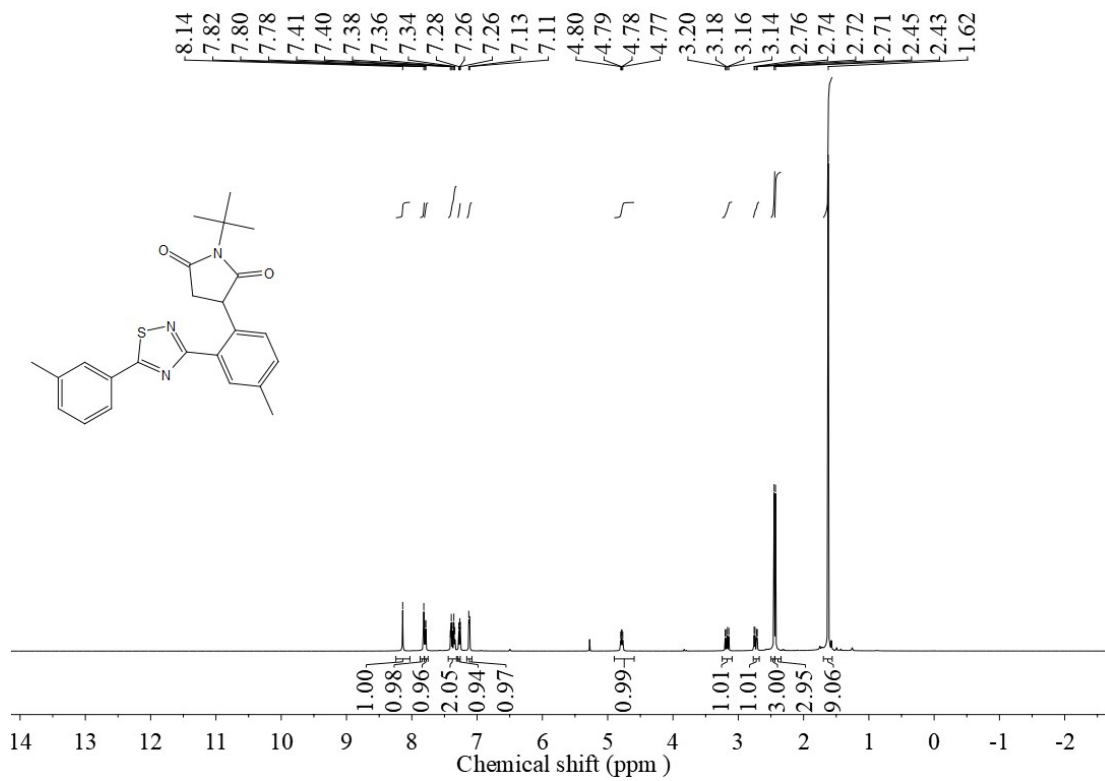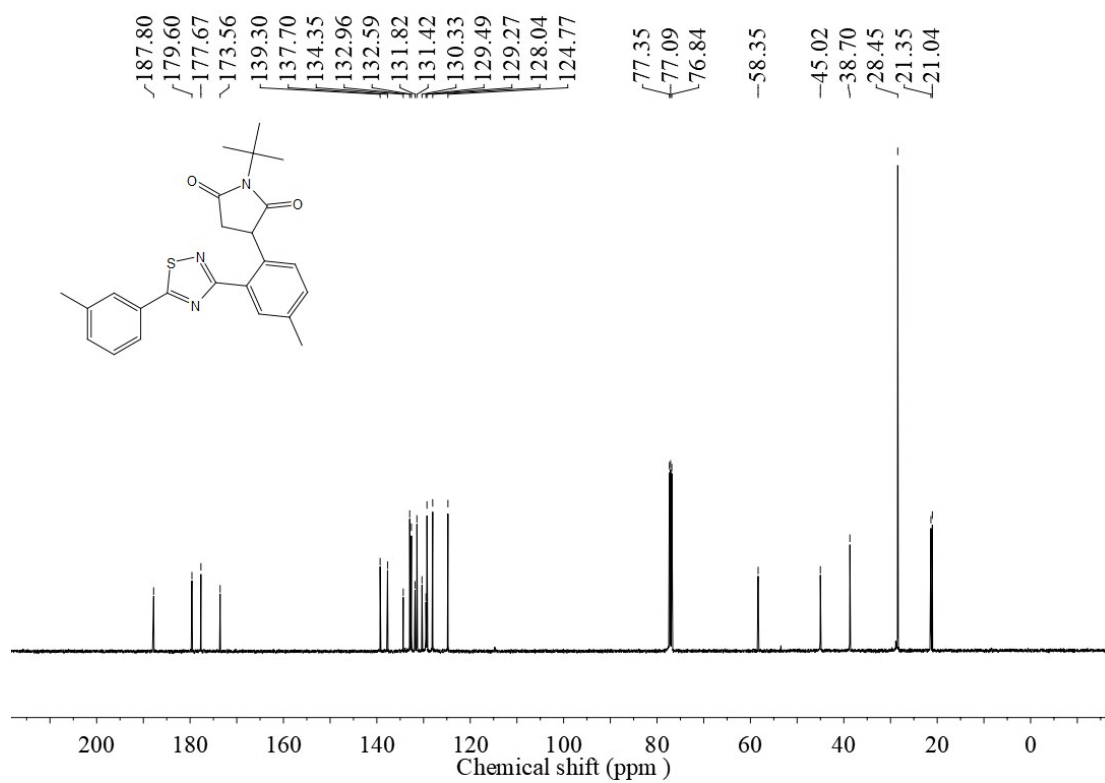

3i:

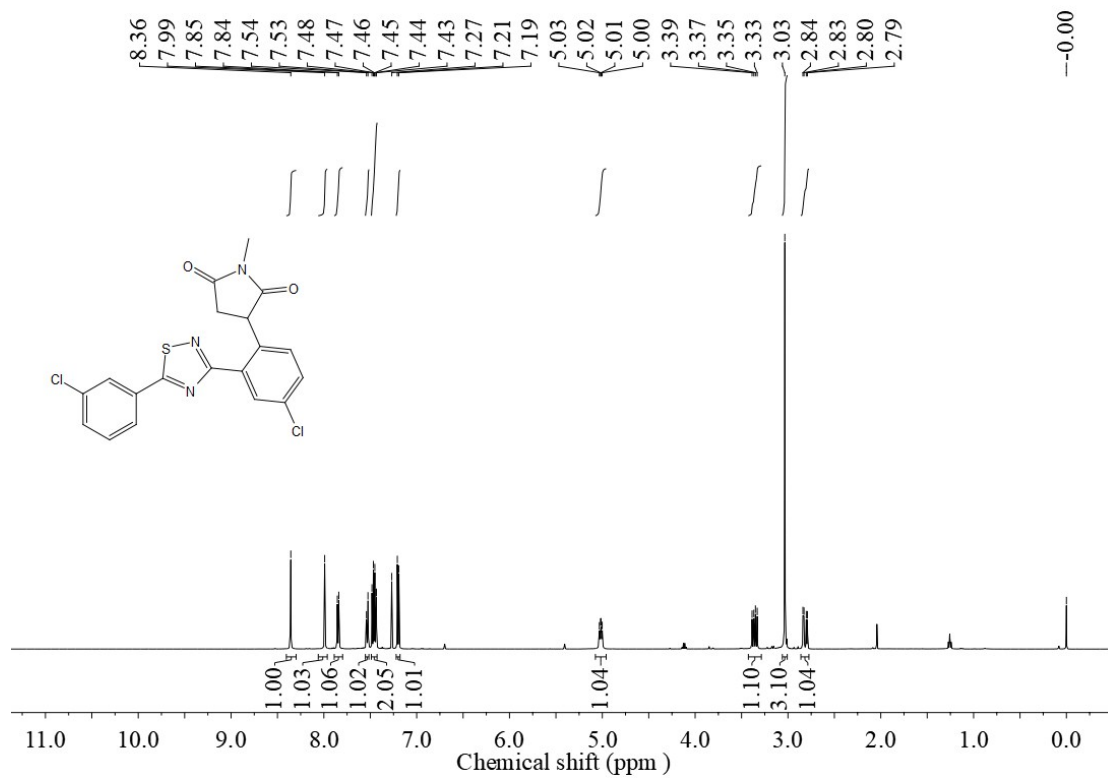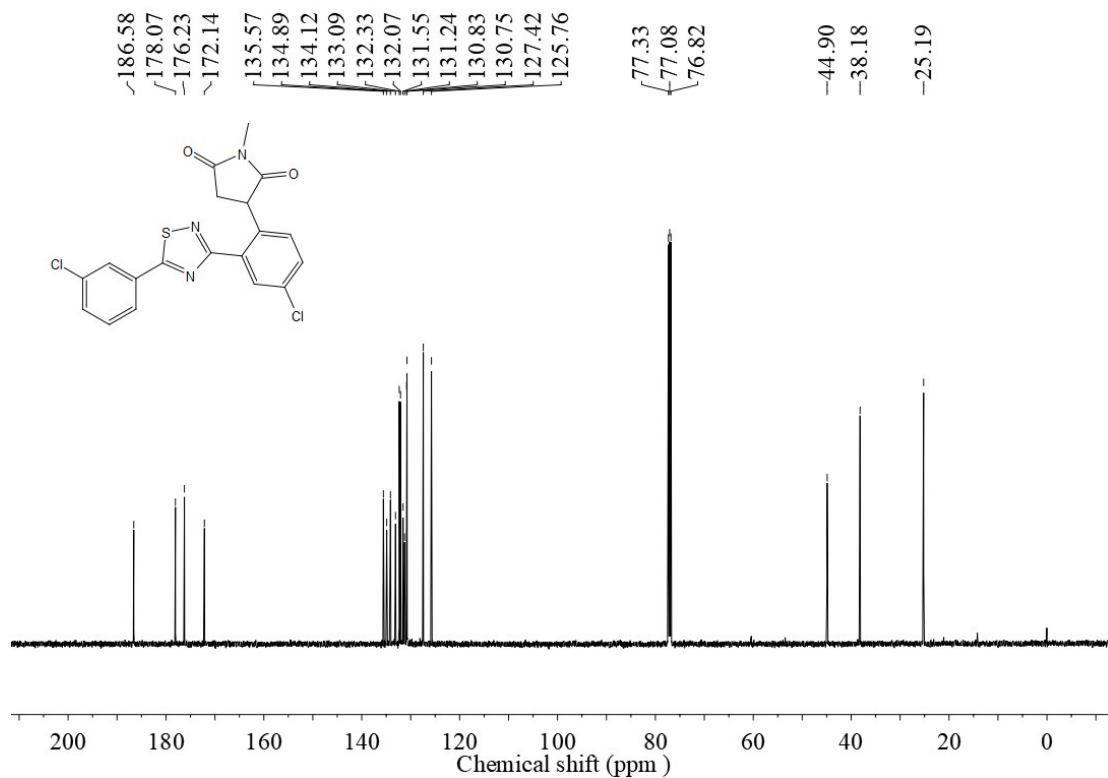

3j:

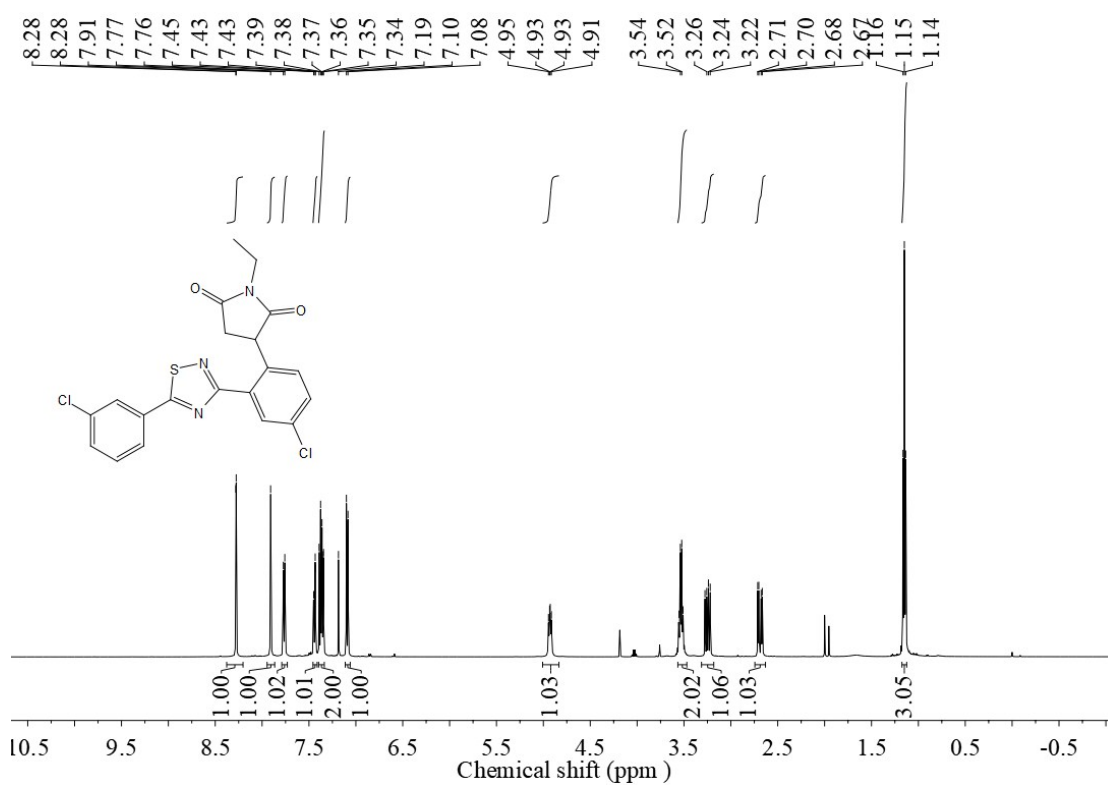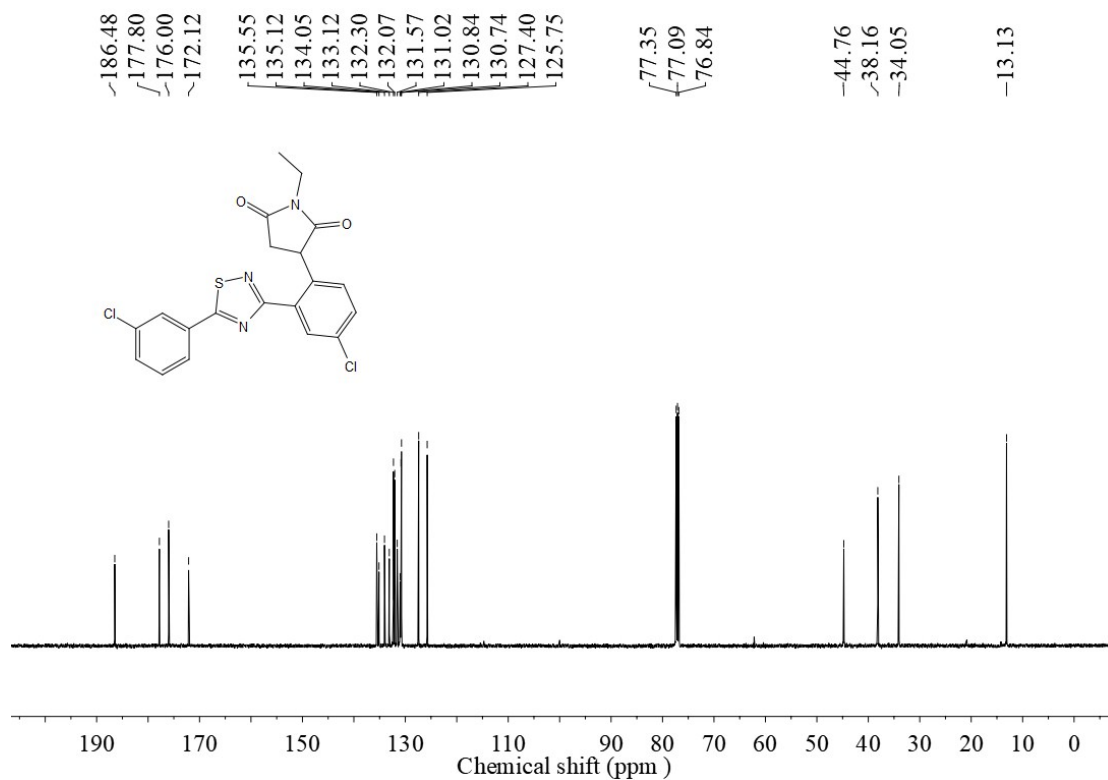

3k:

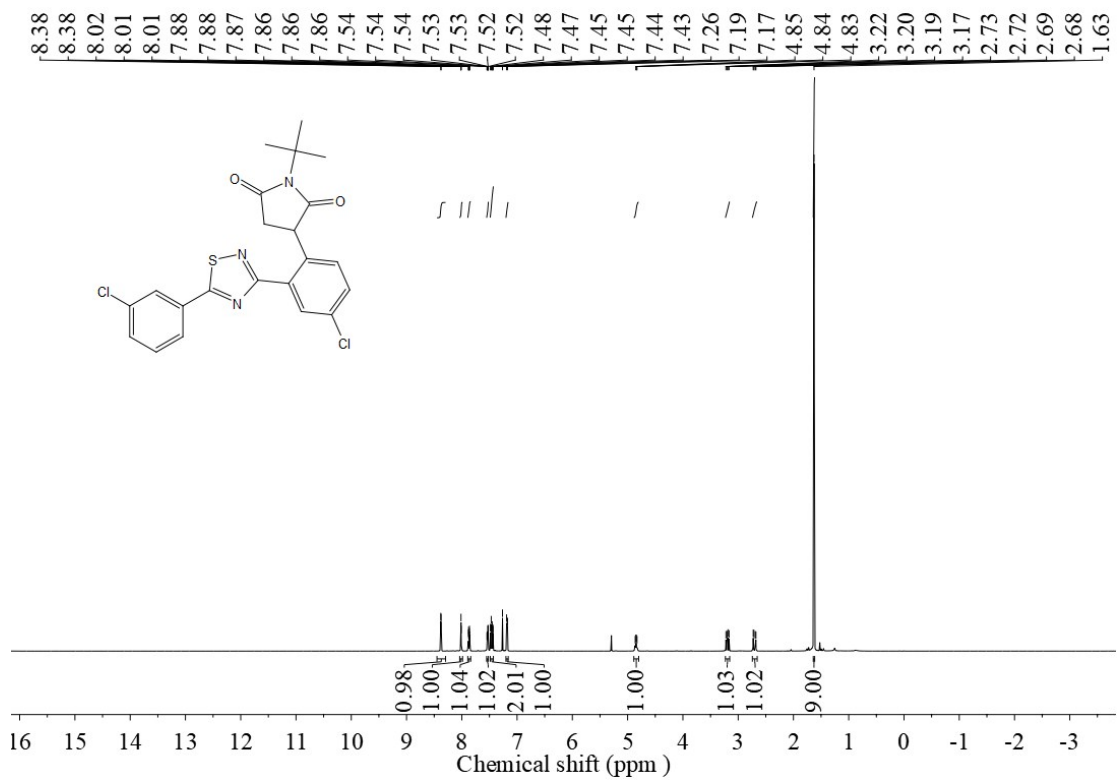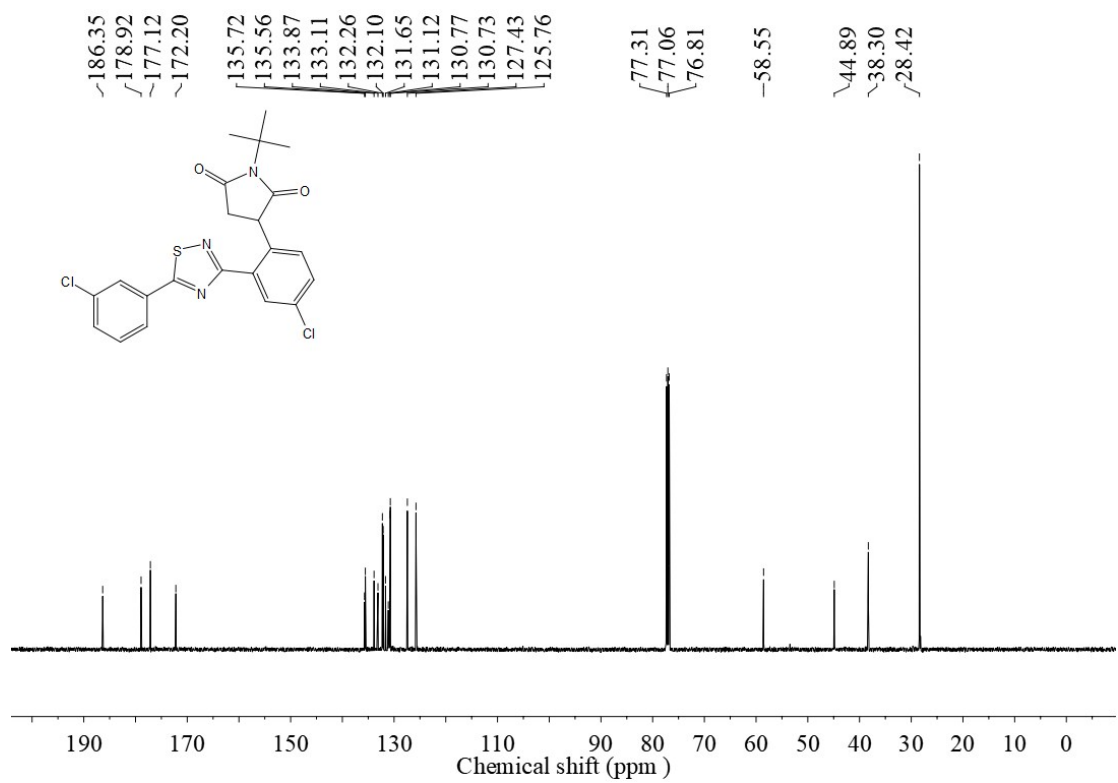



3l:

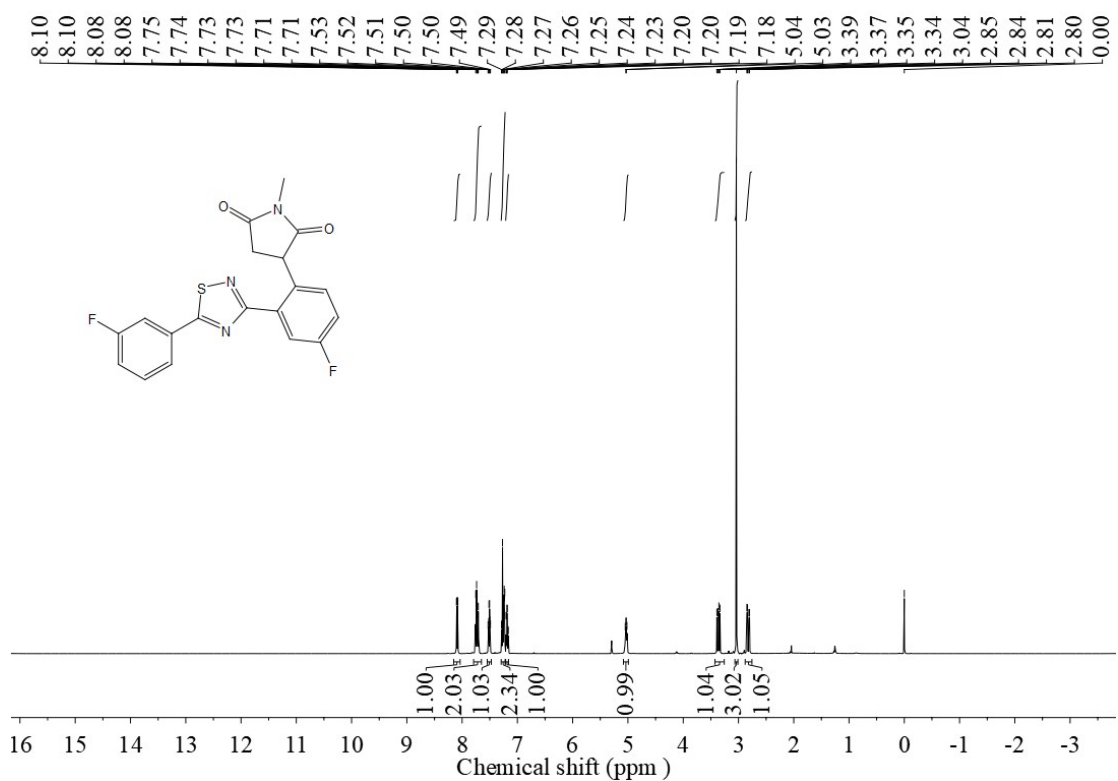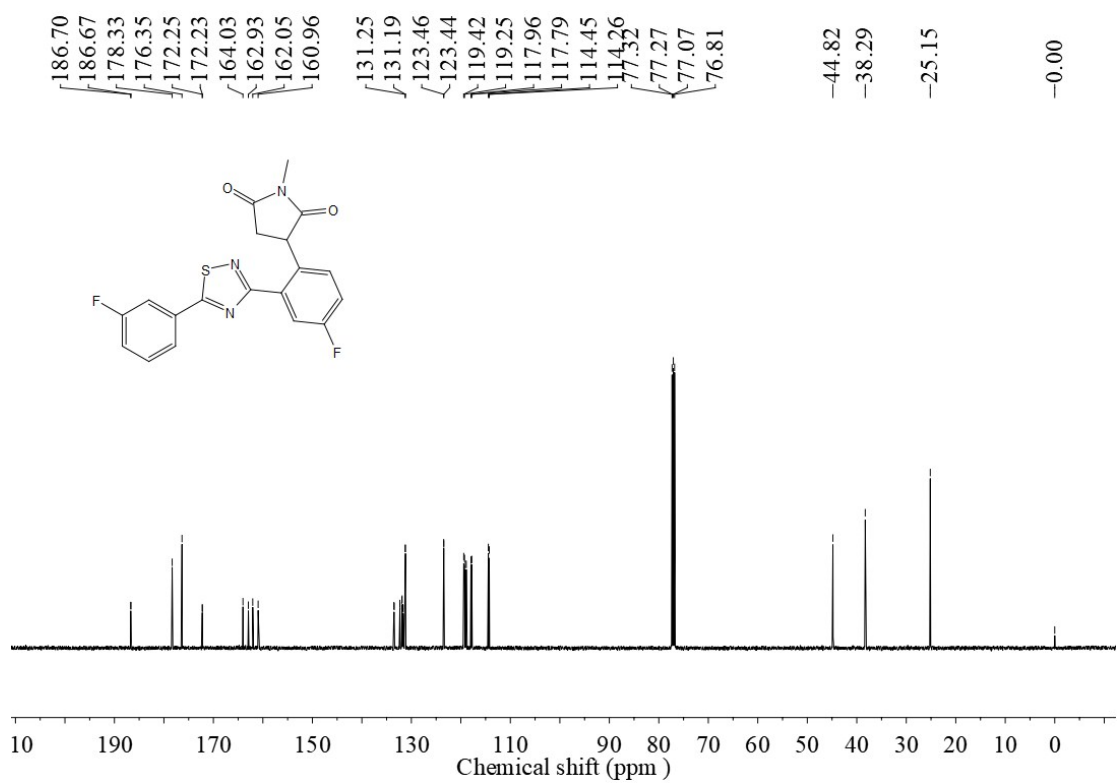

3m:

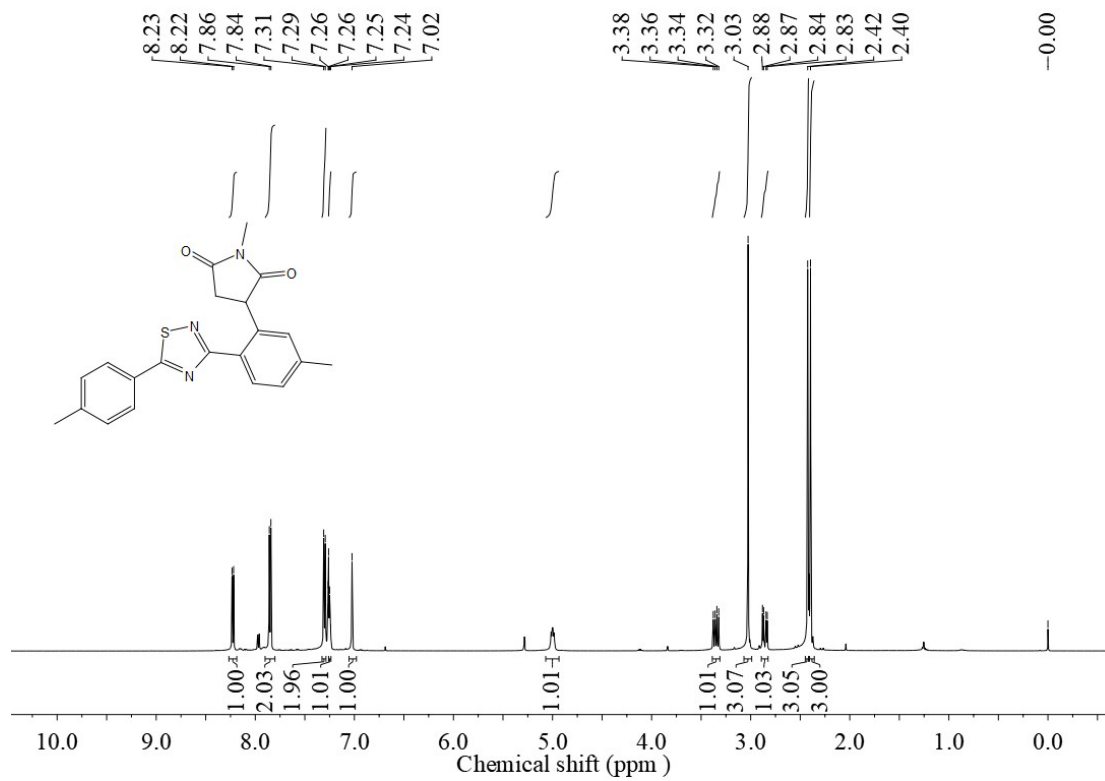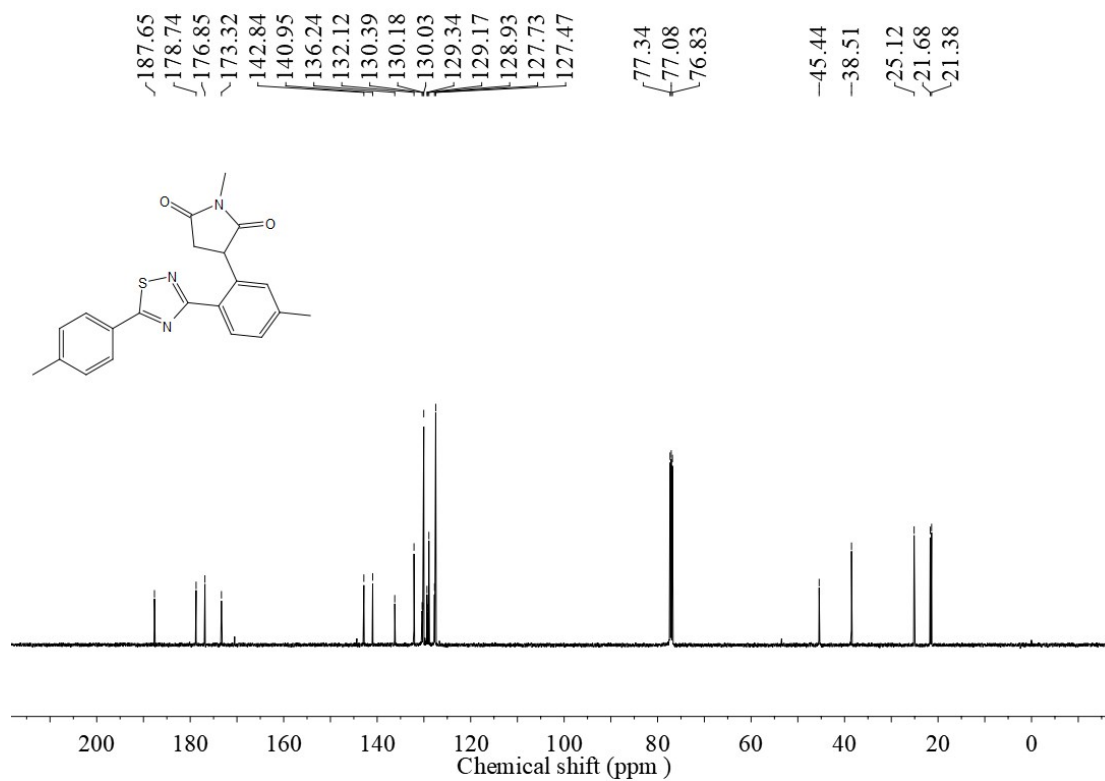

3n:

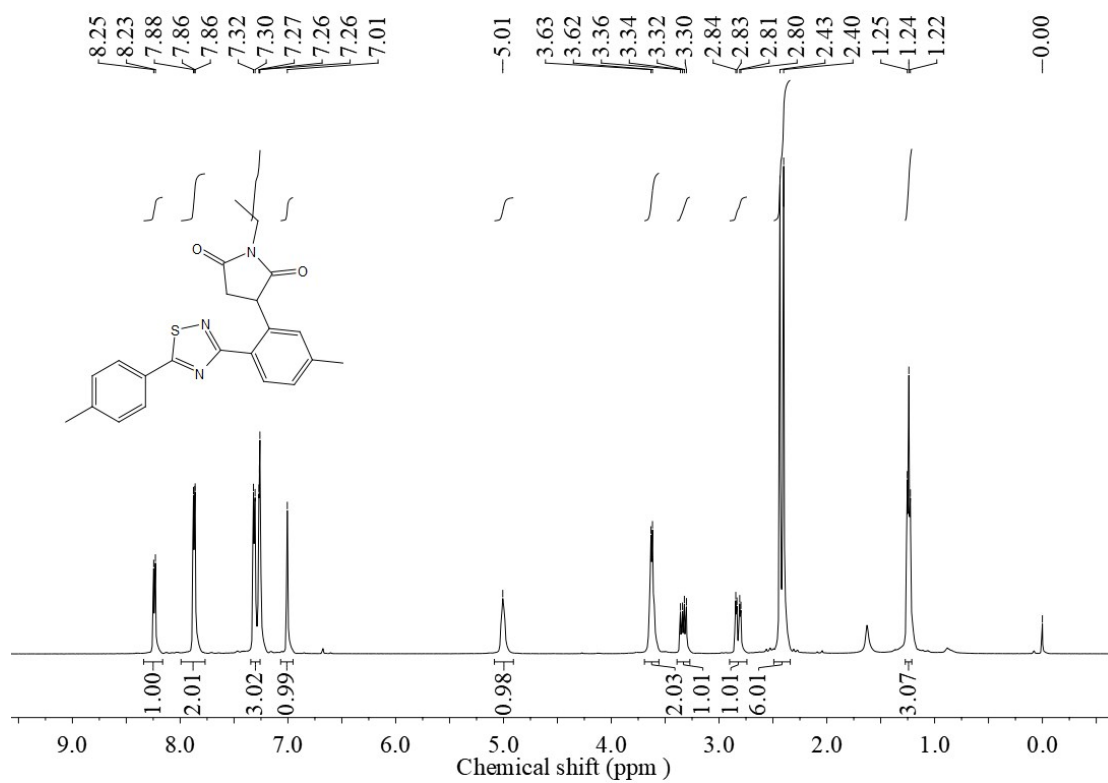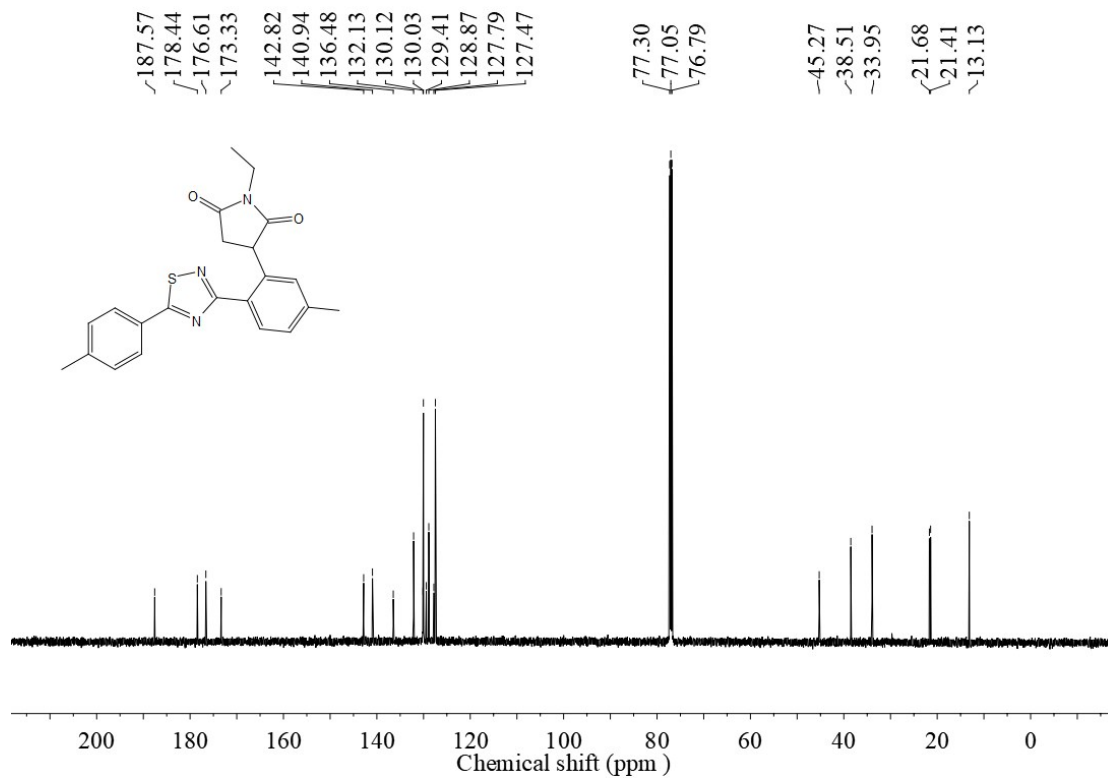

3o:

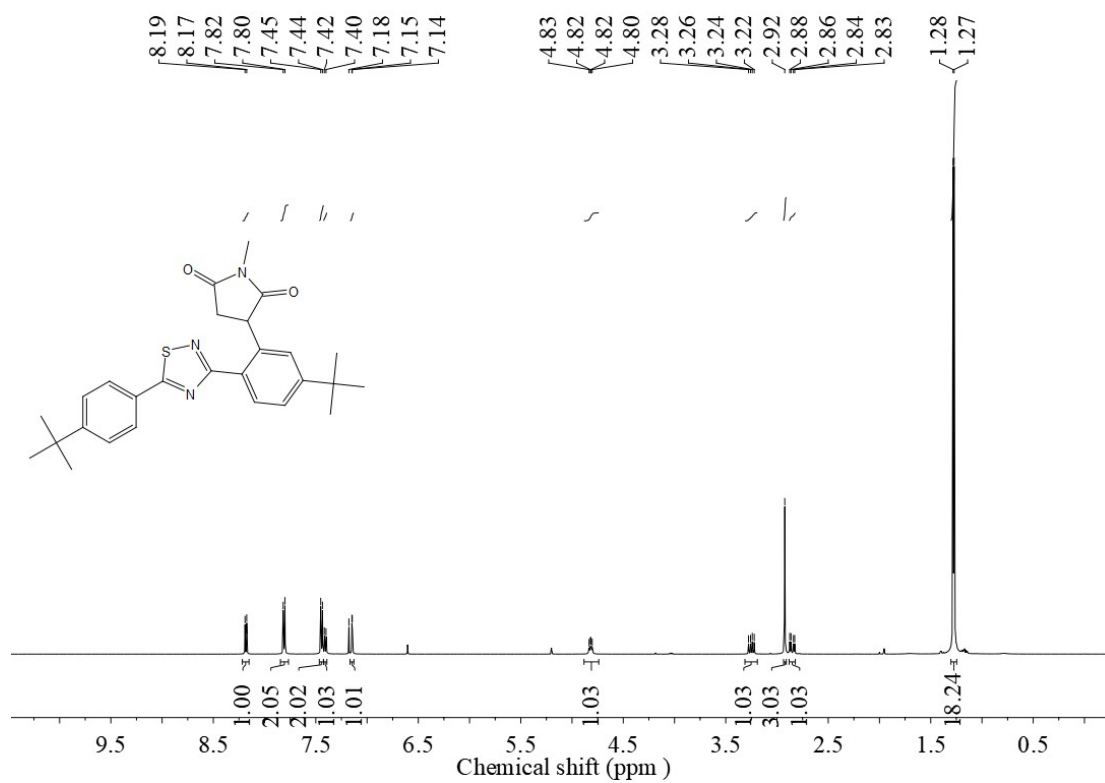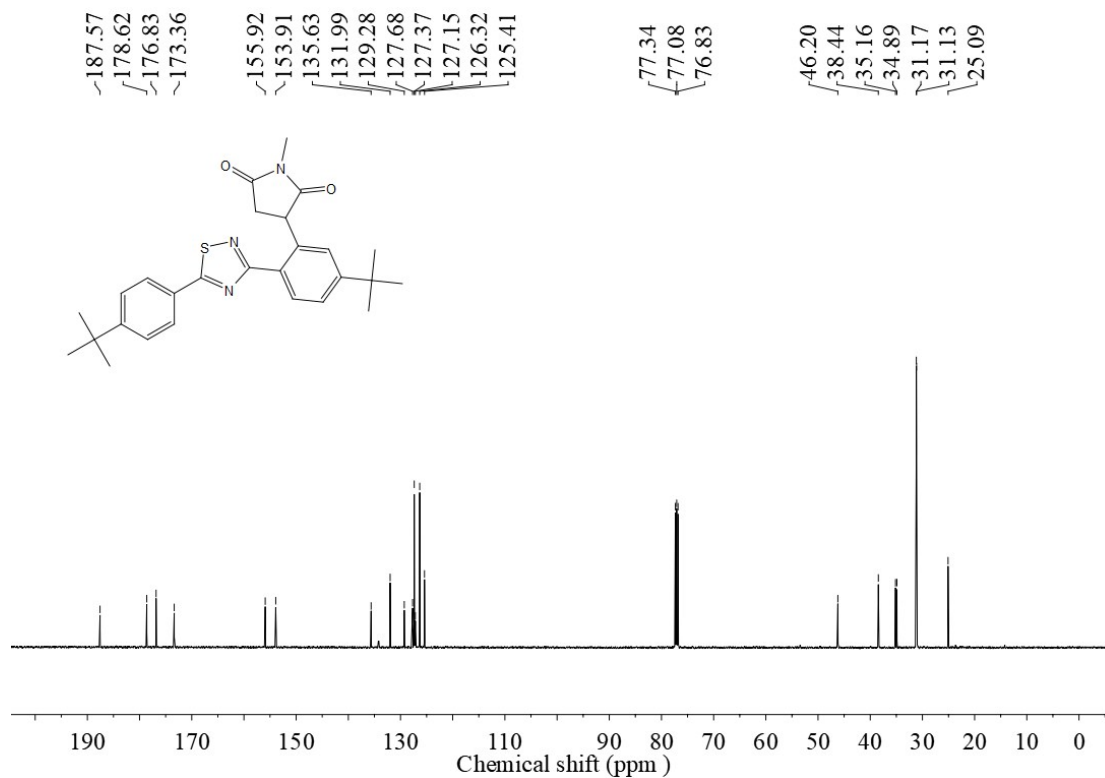

3p:

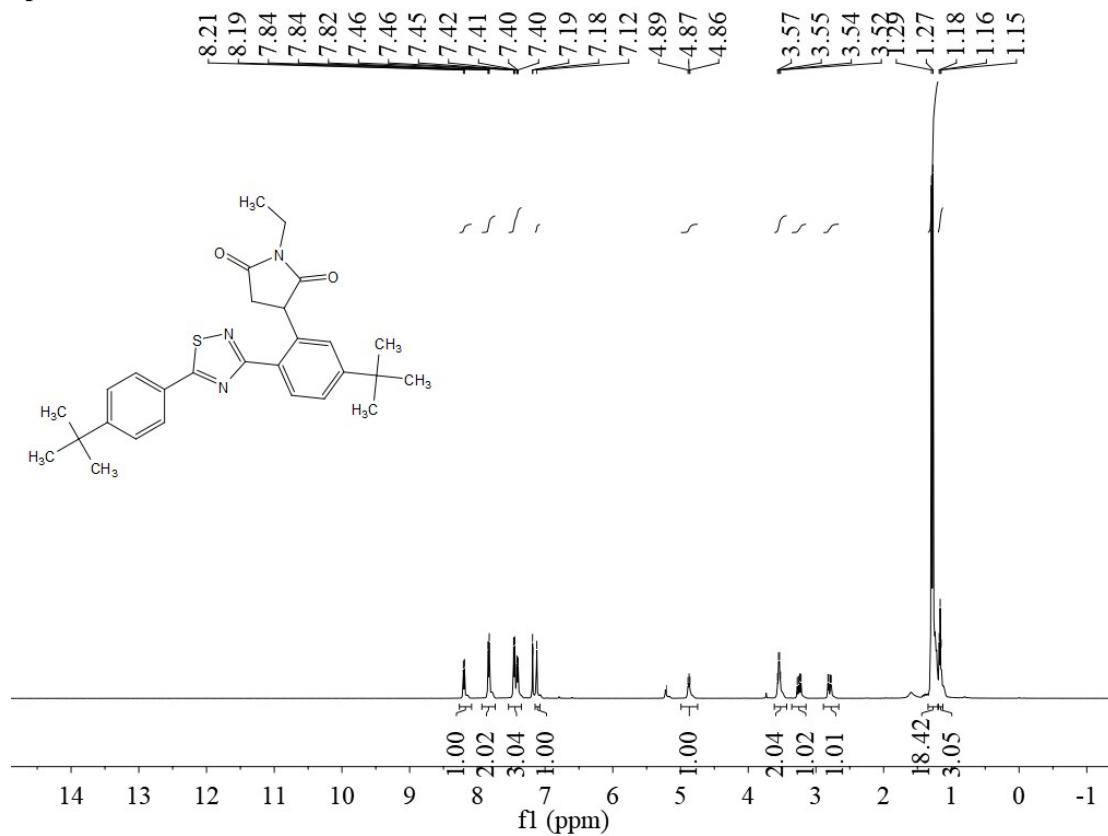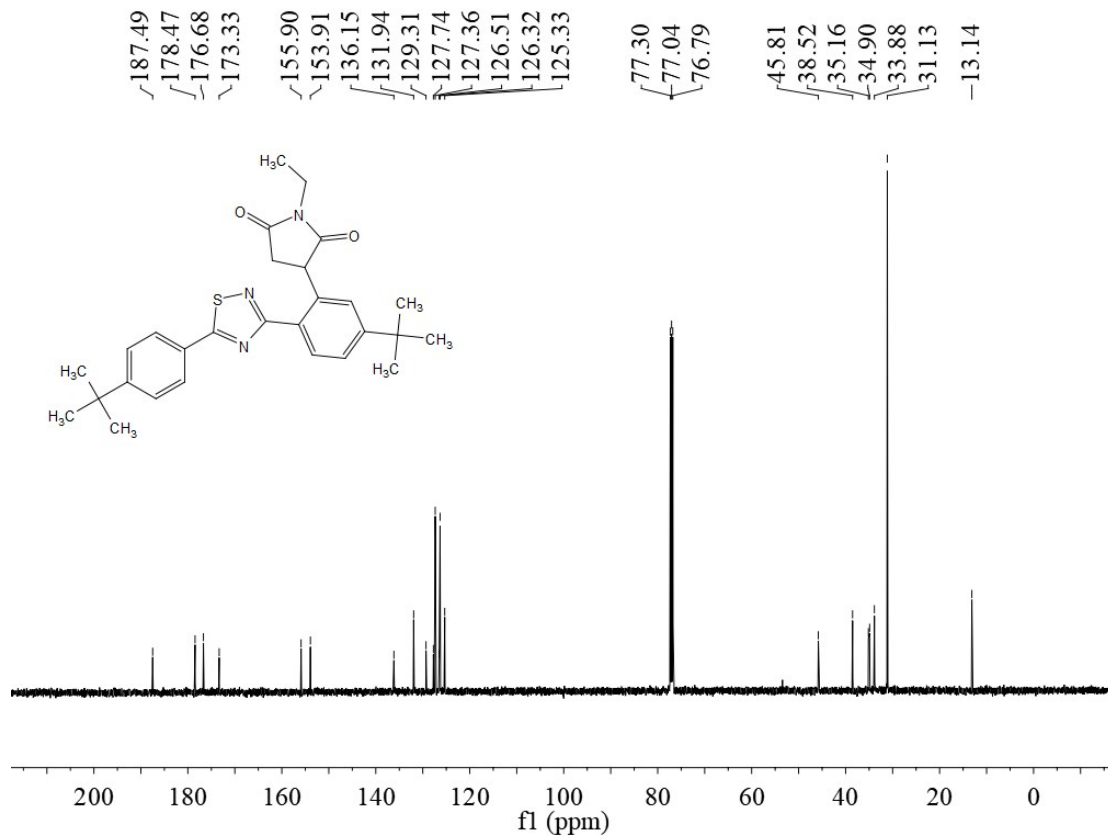

3q:

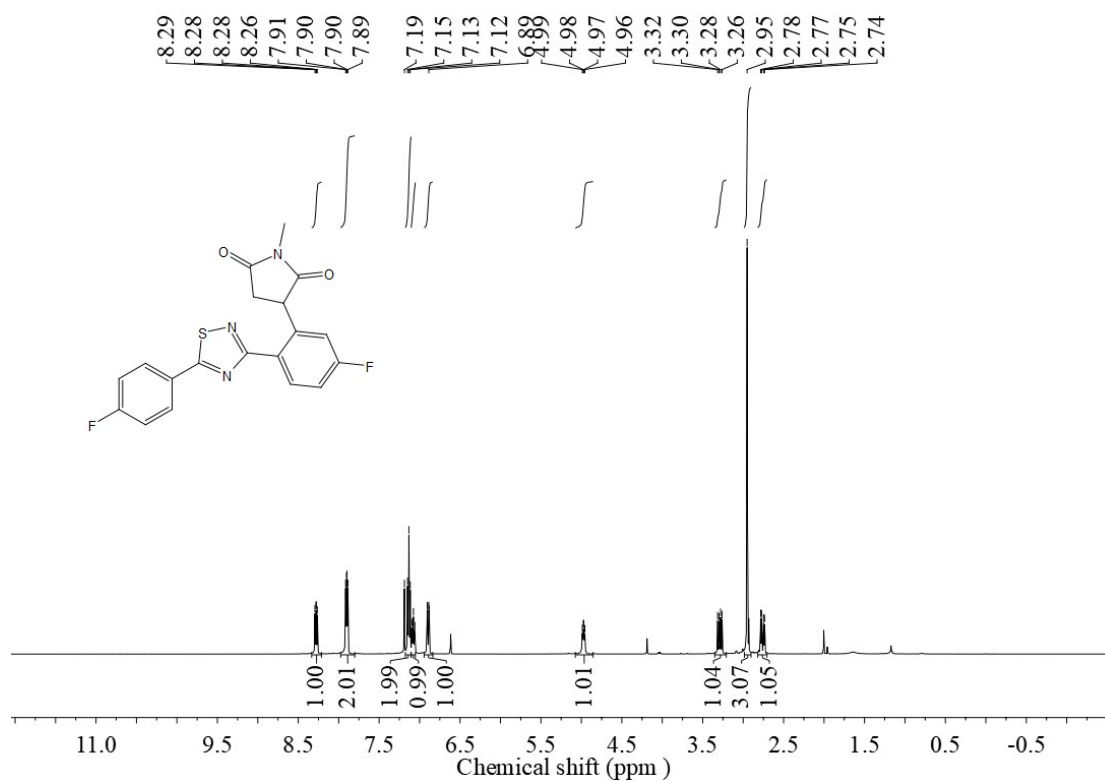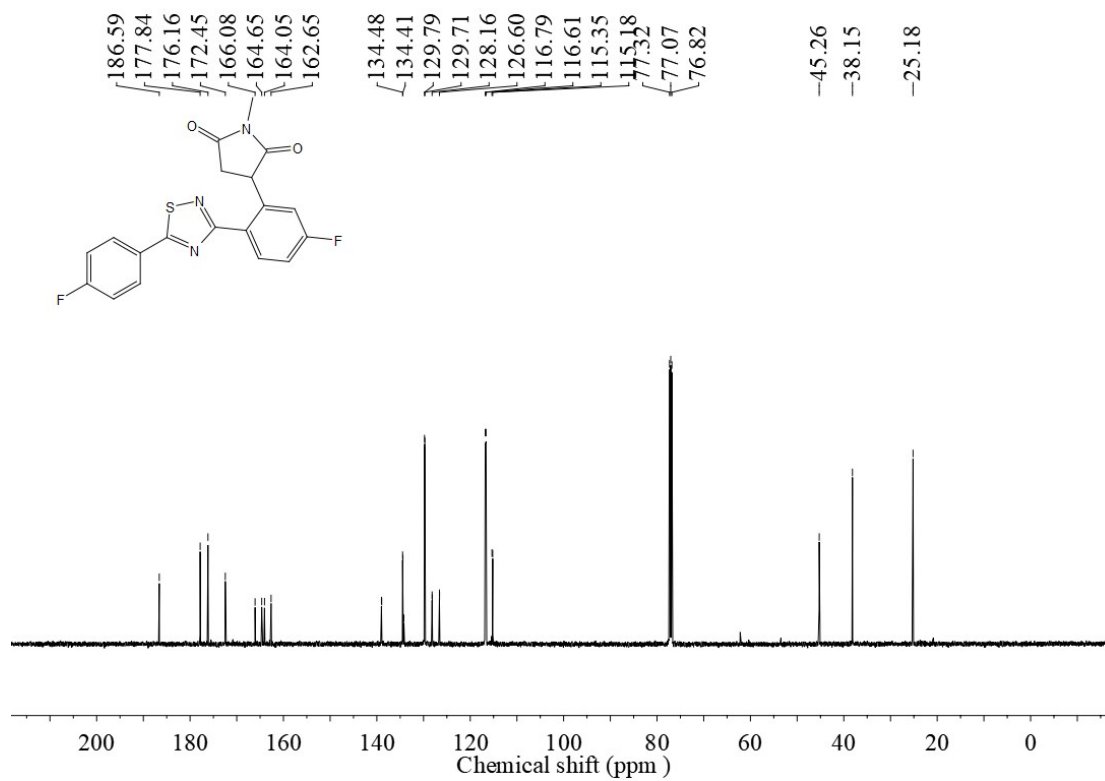

3r:

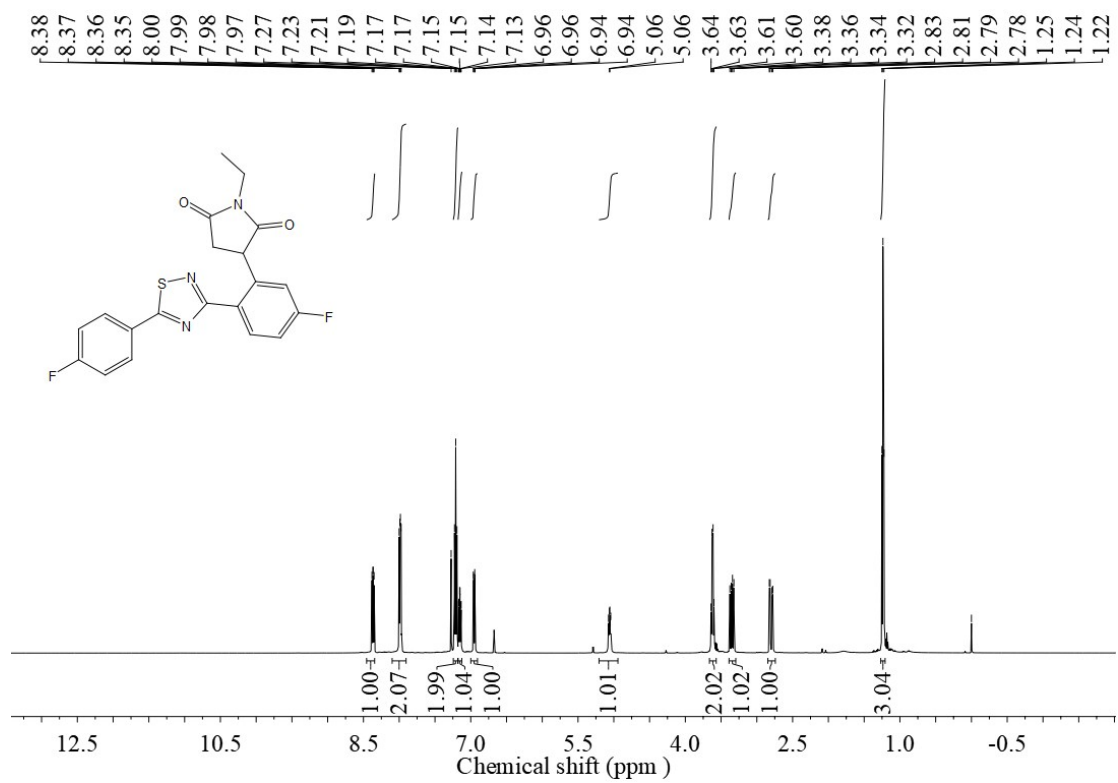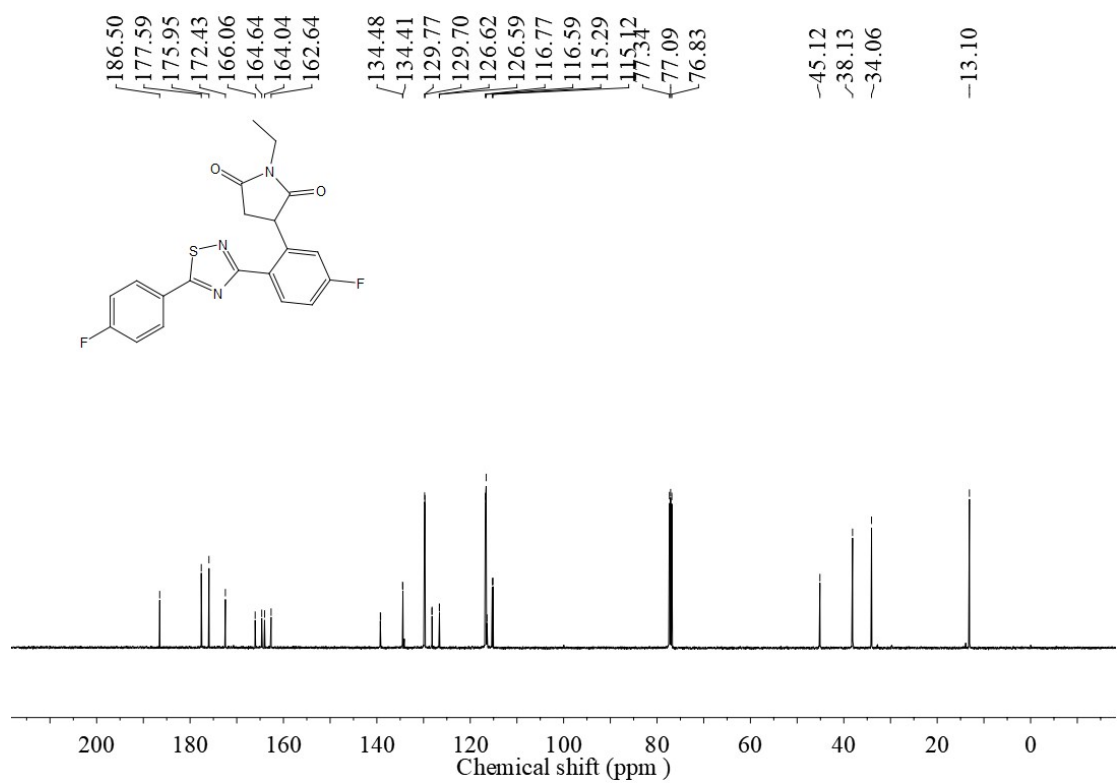

3s:

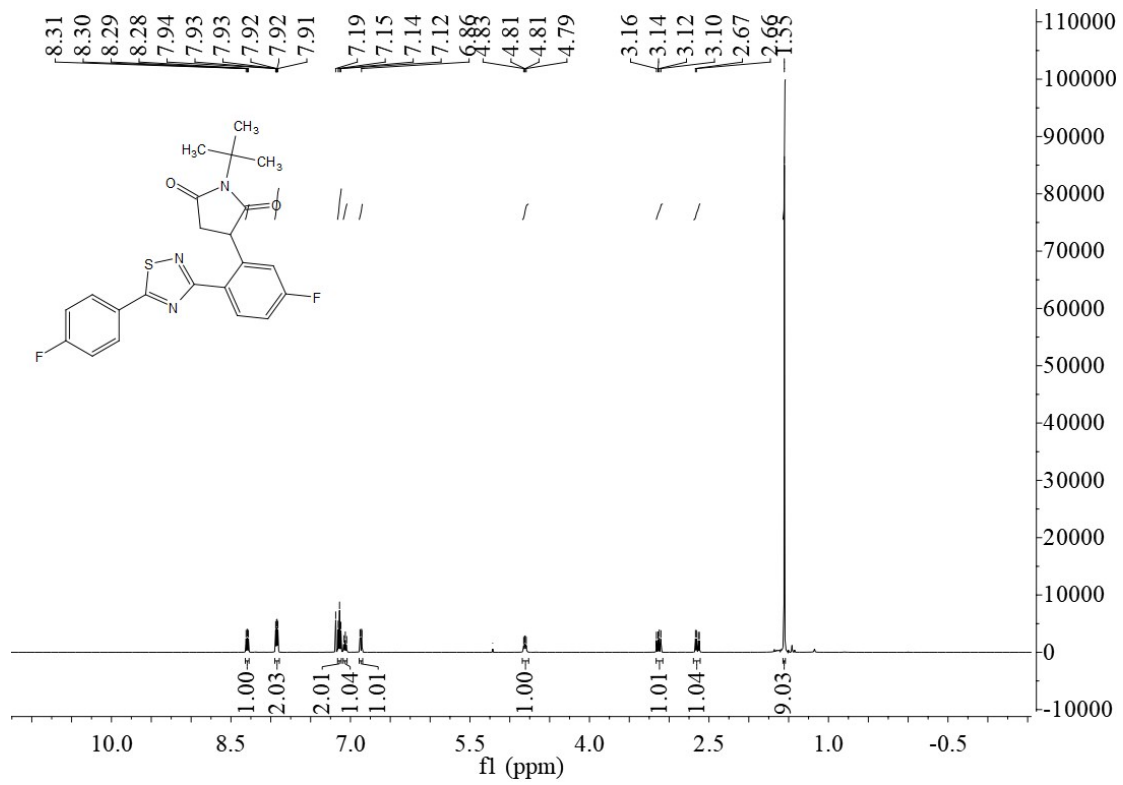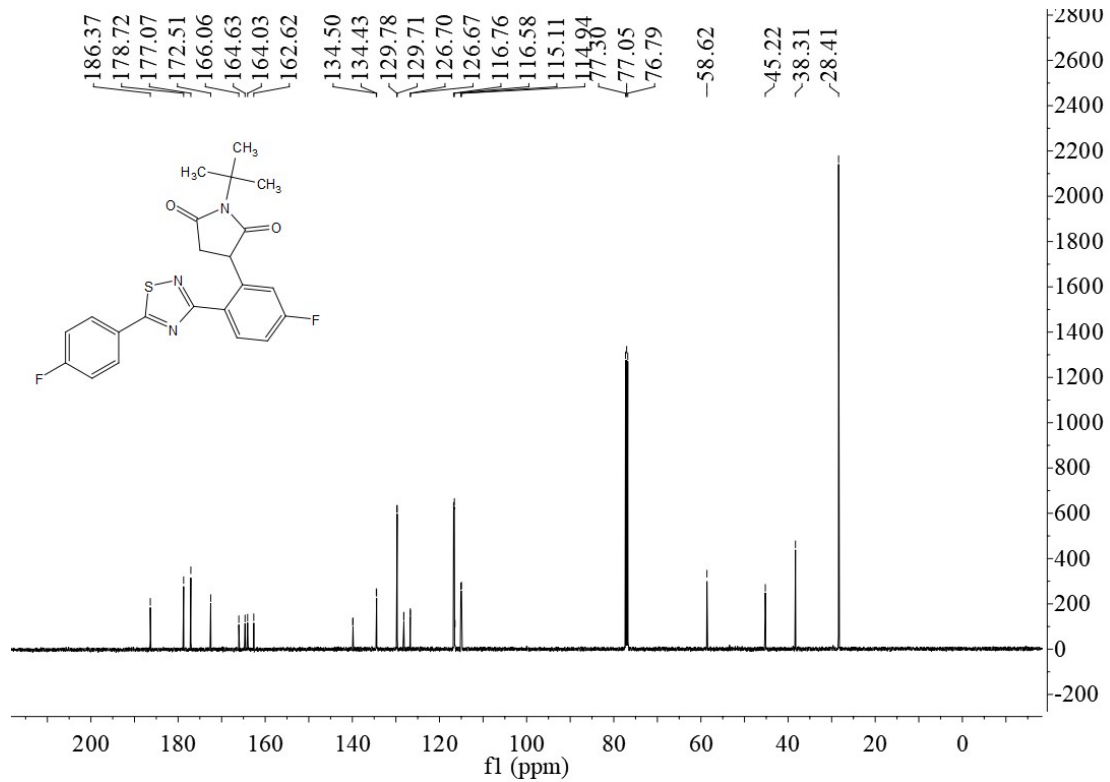



3t:

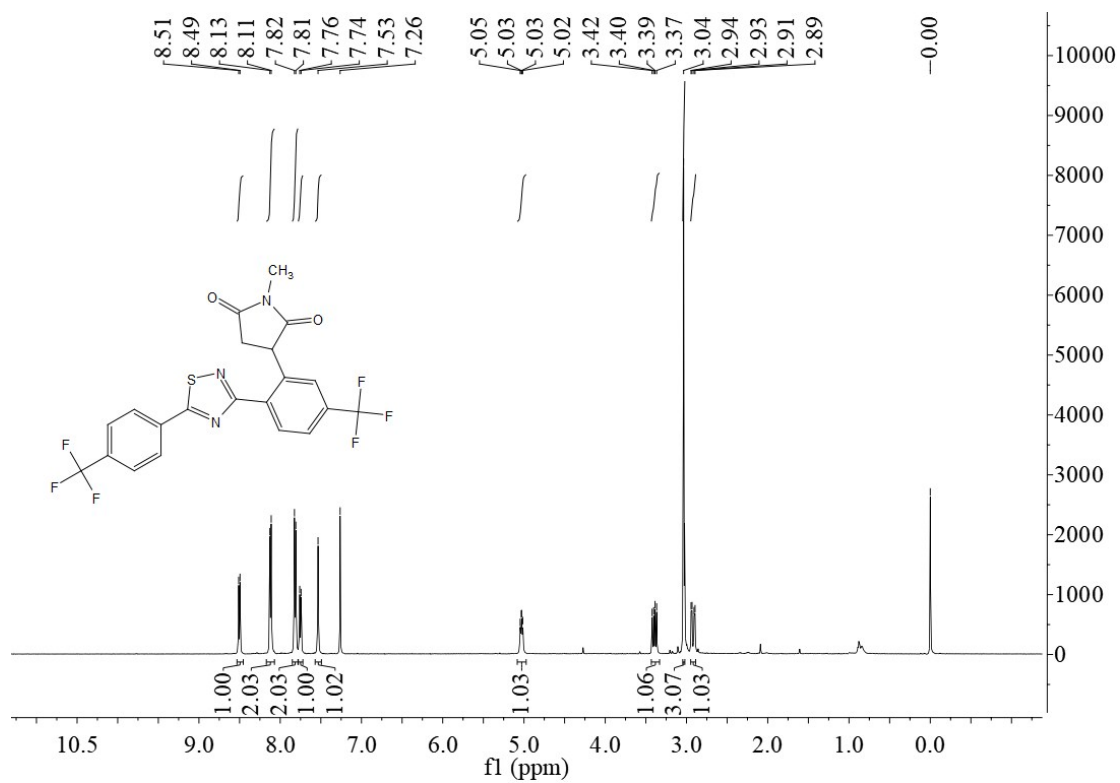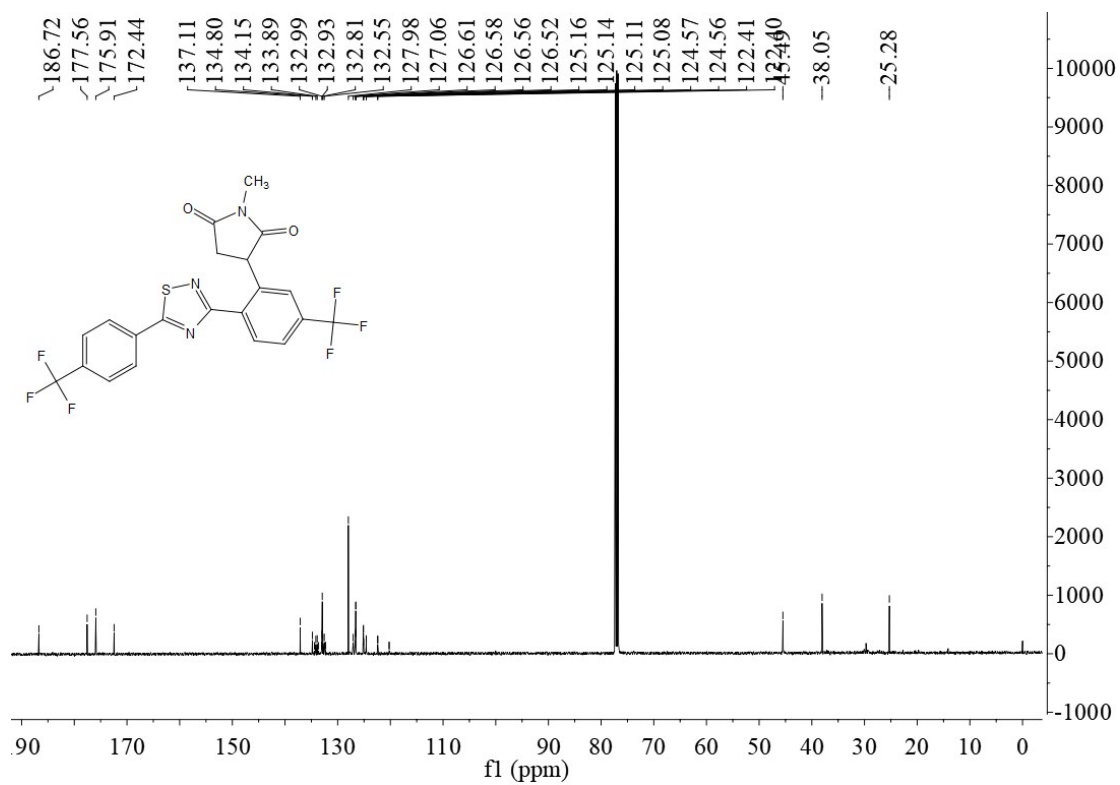

3u:

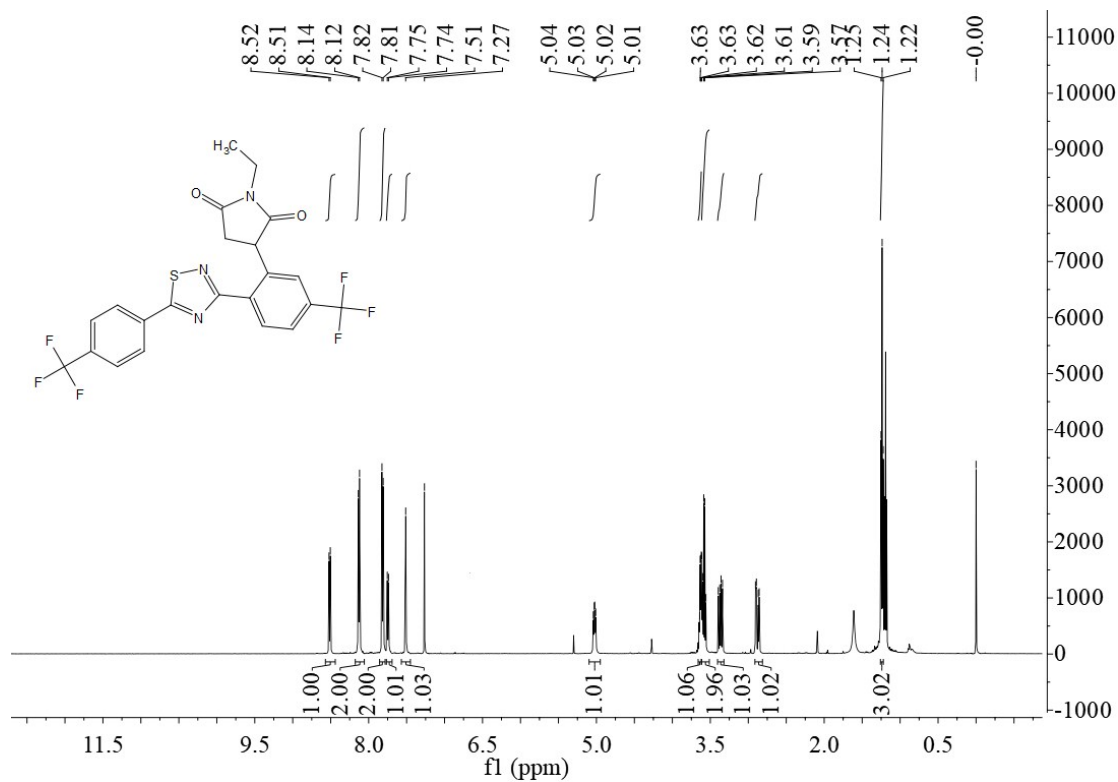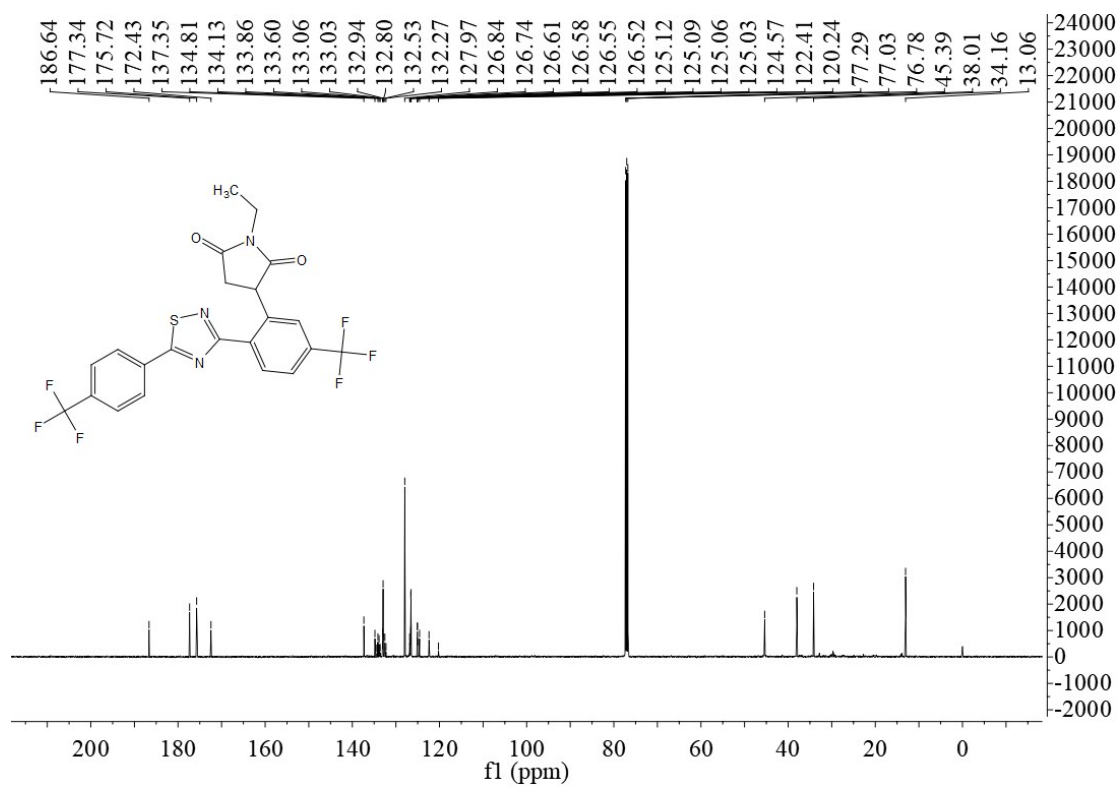

3w:

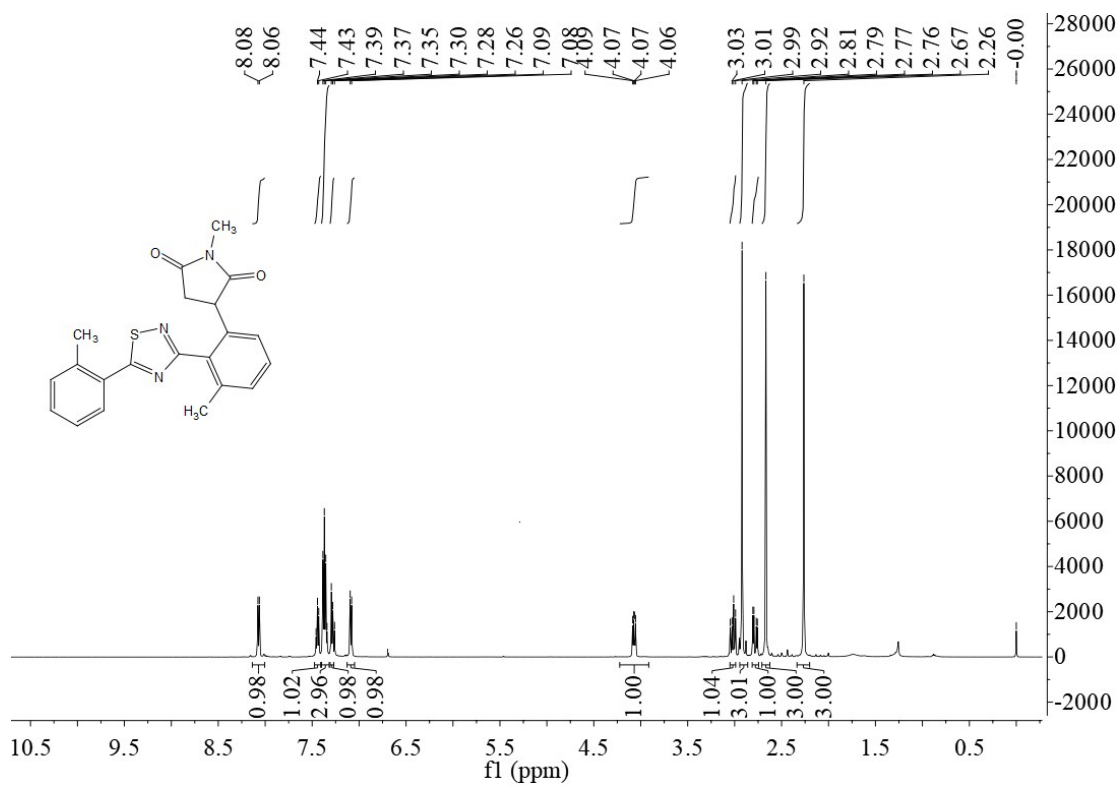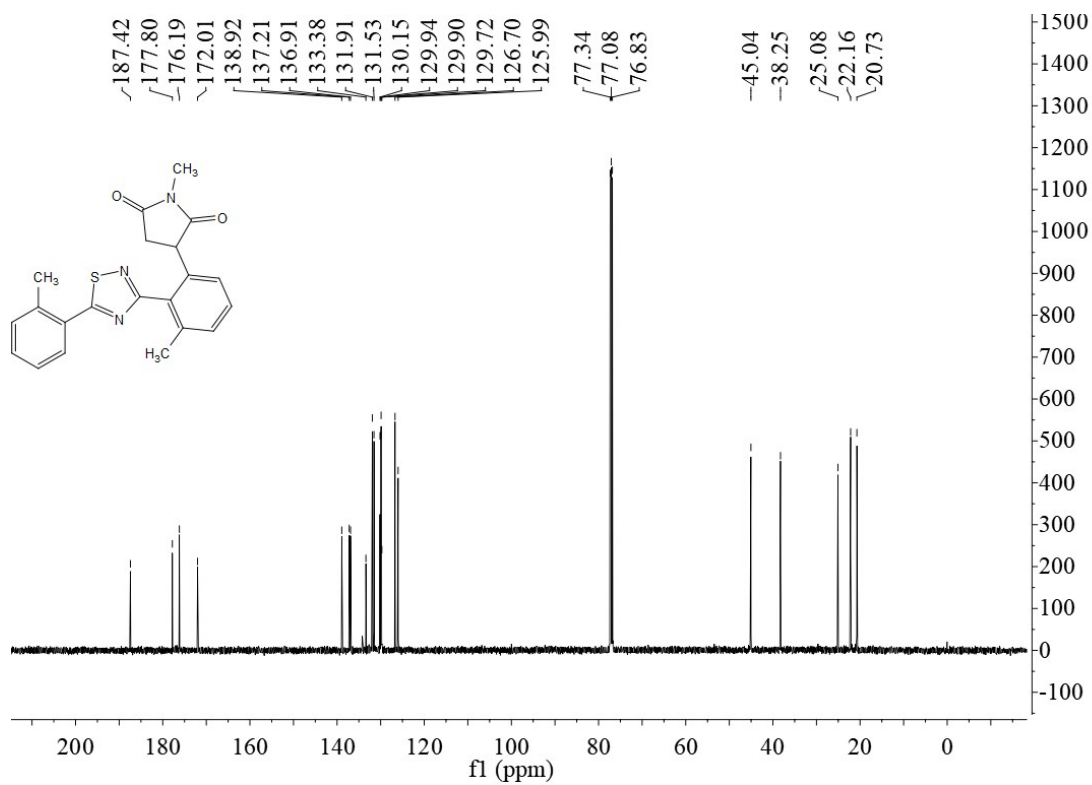

3x:

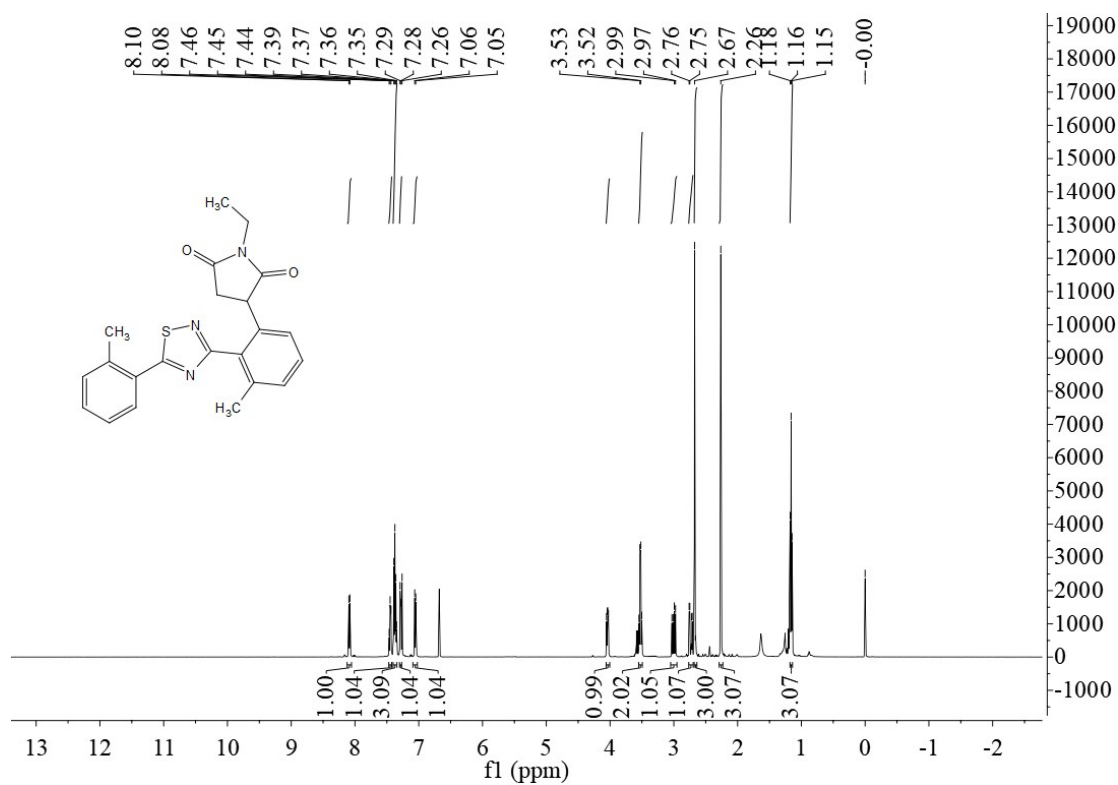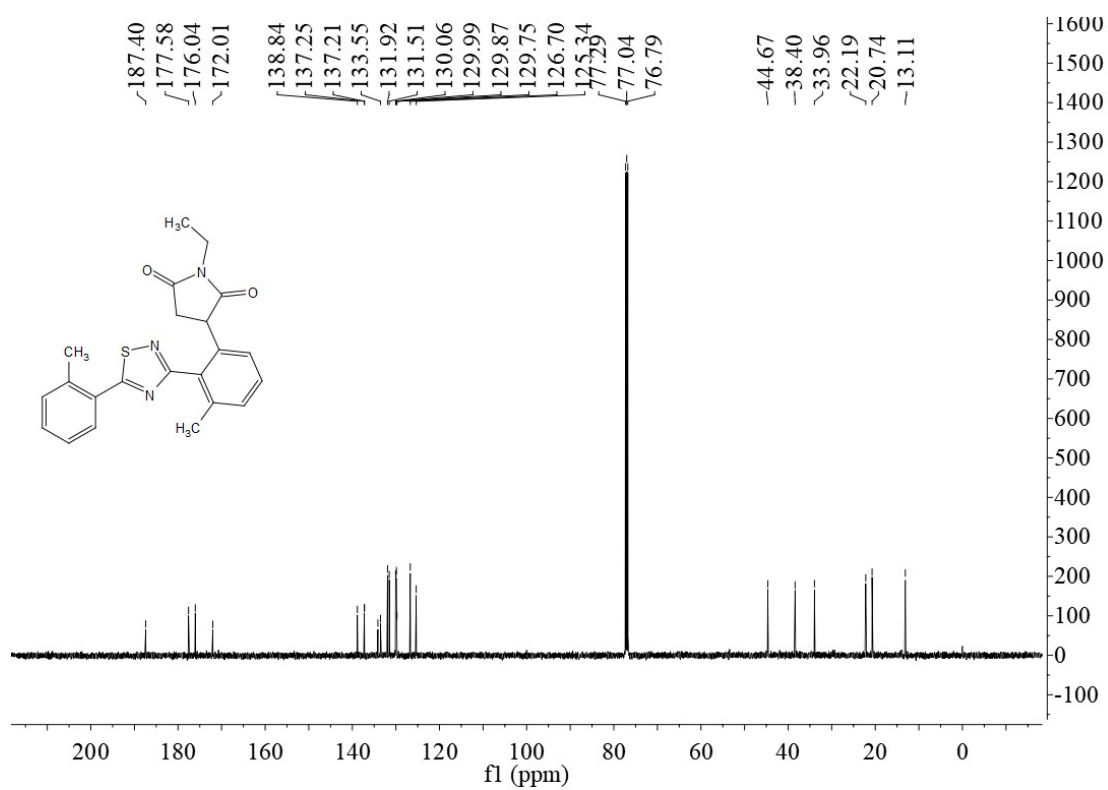

3y:

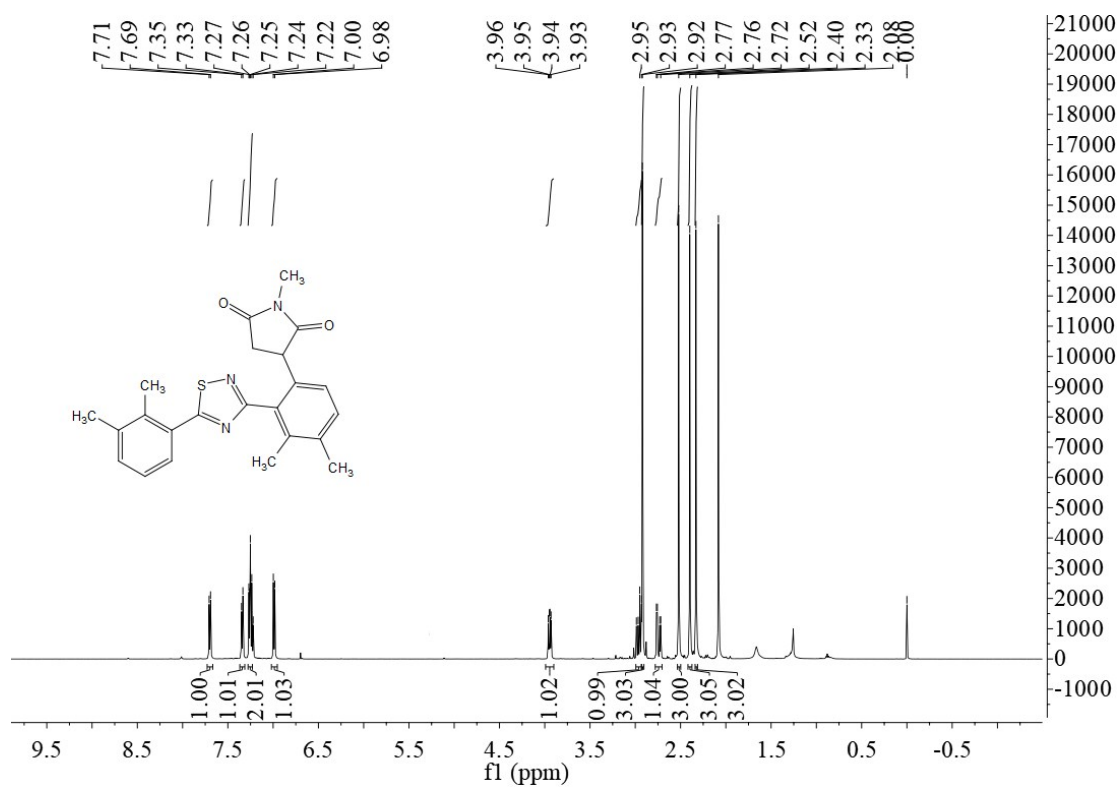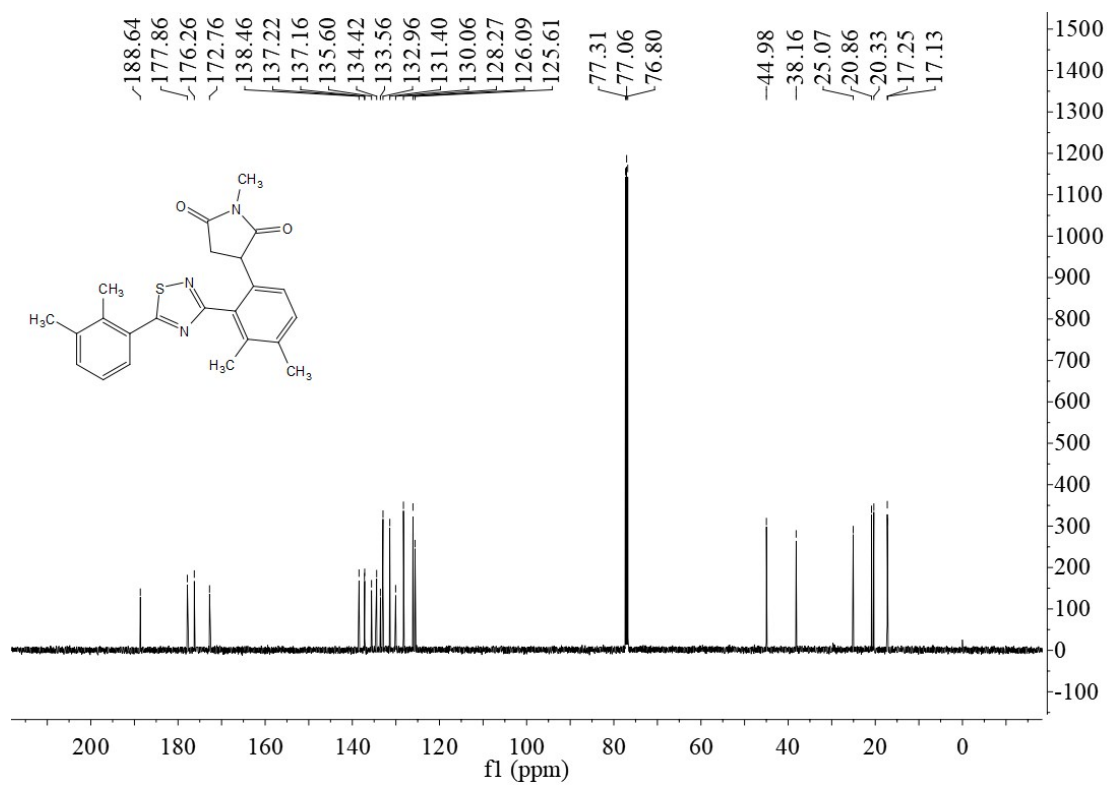

3z:

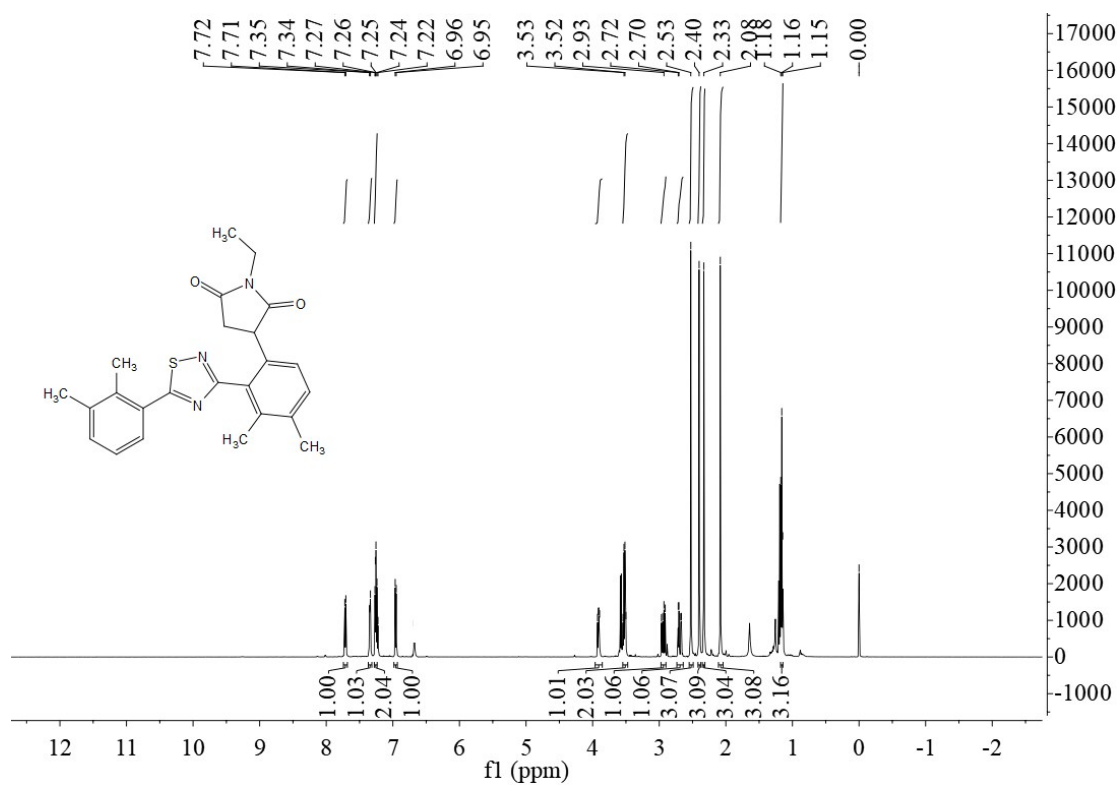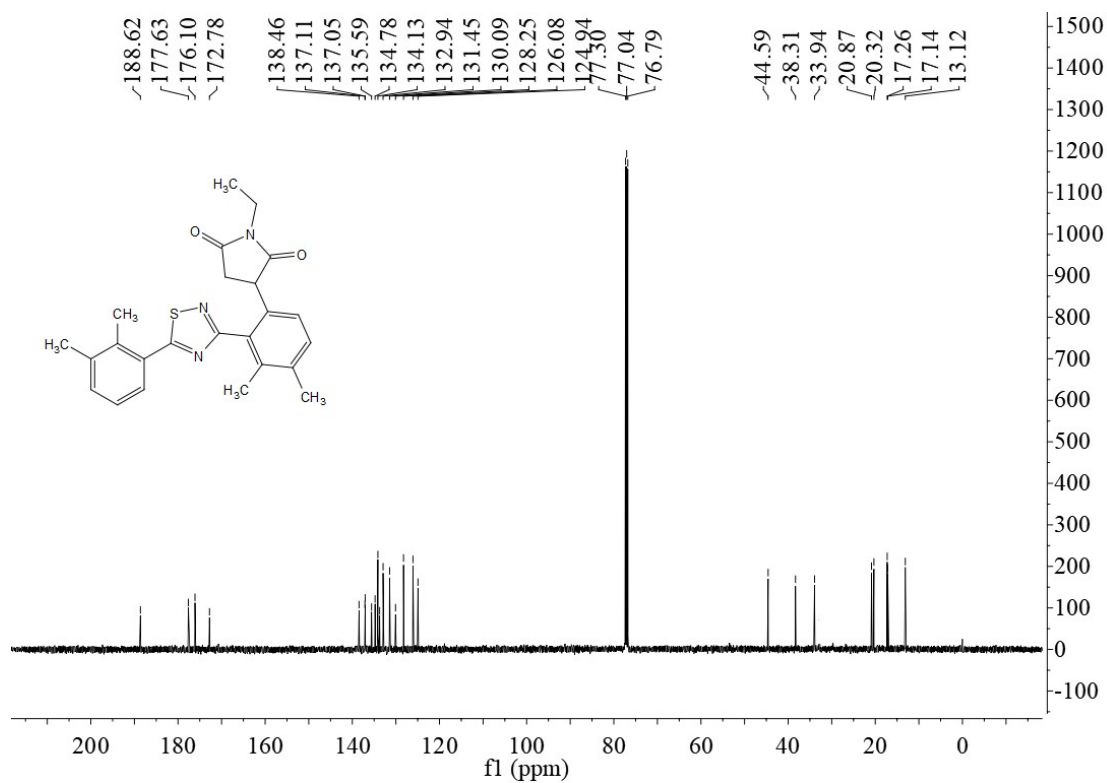

3aa:

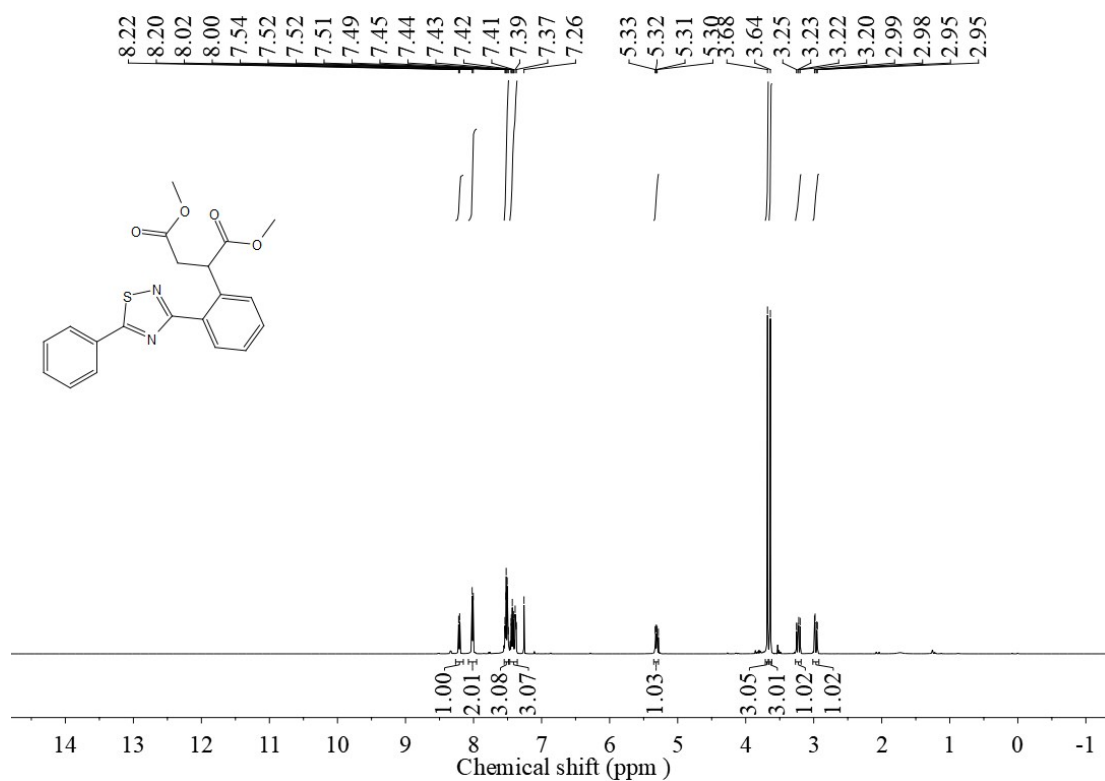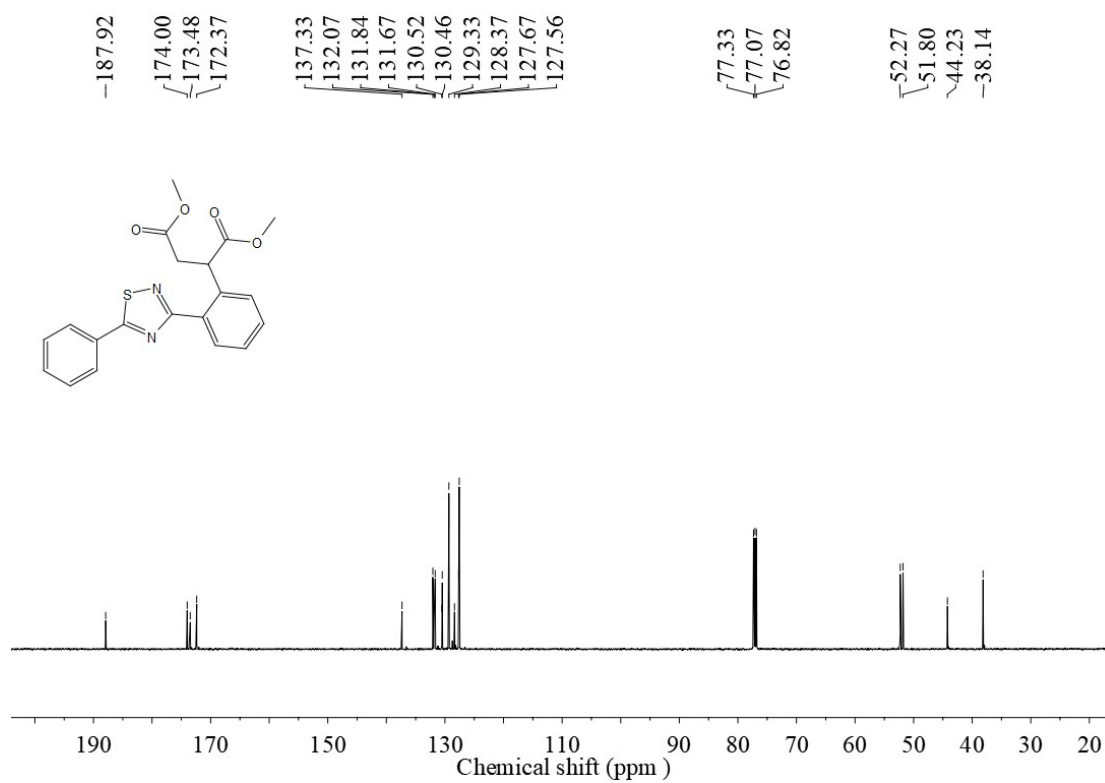

3ab:

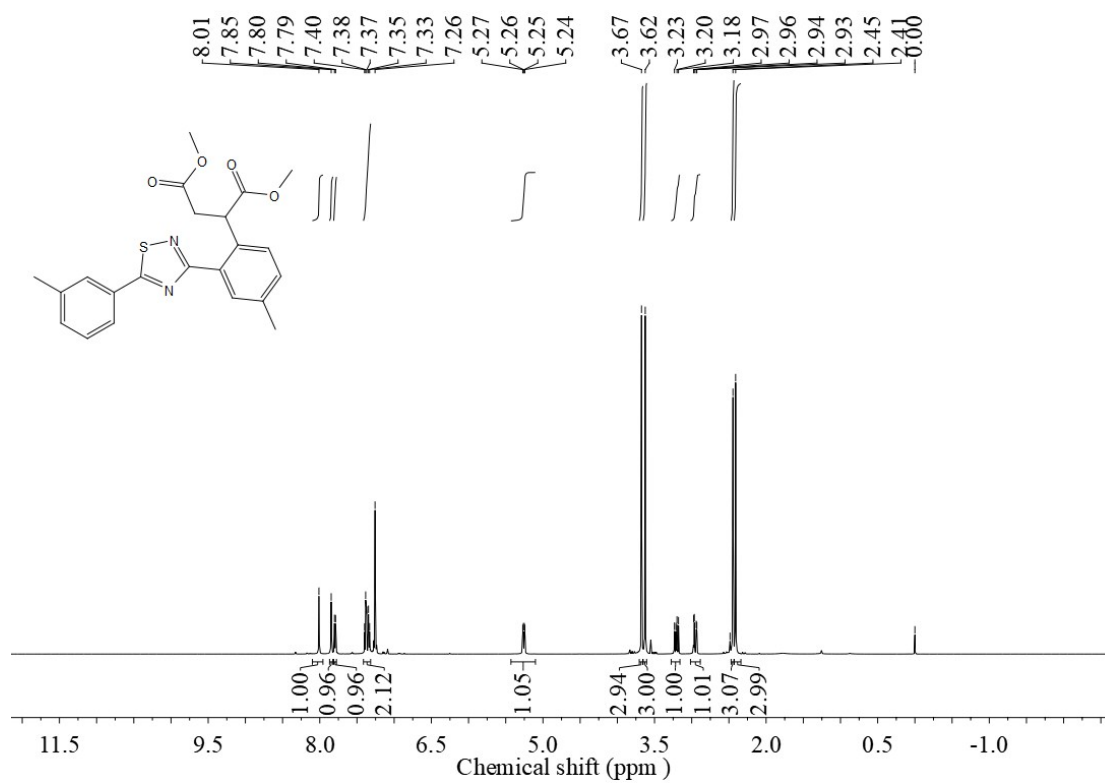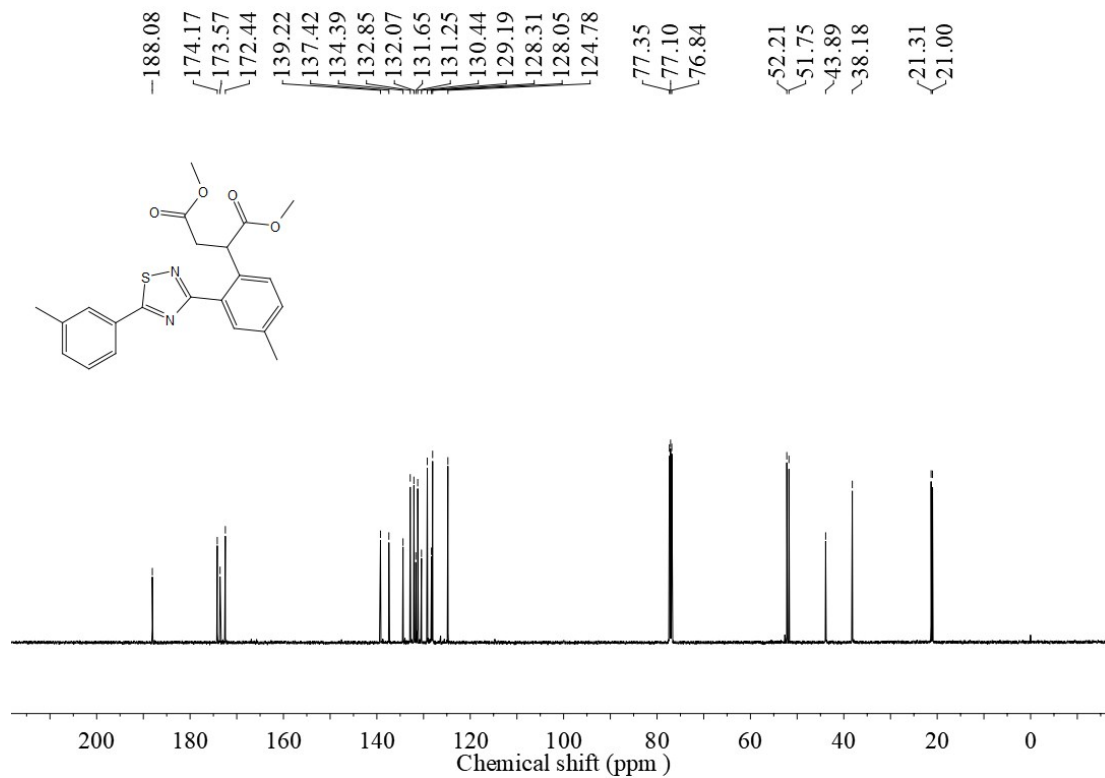



**3ac:**

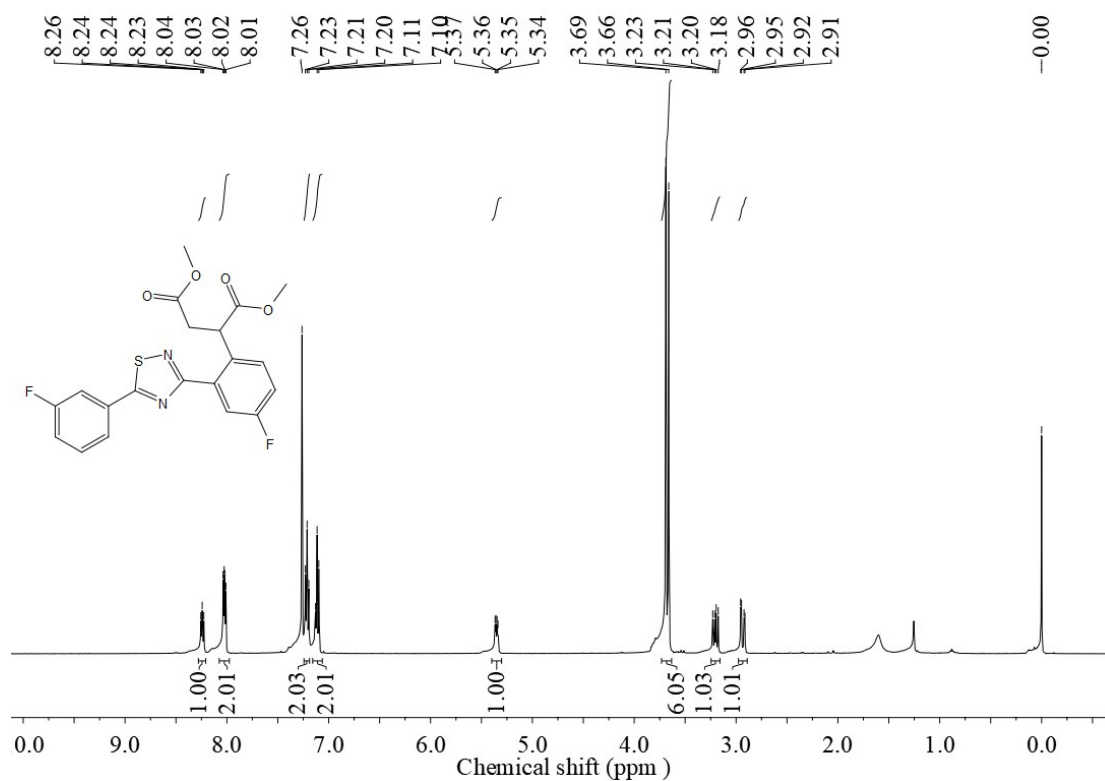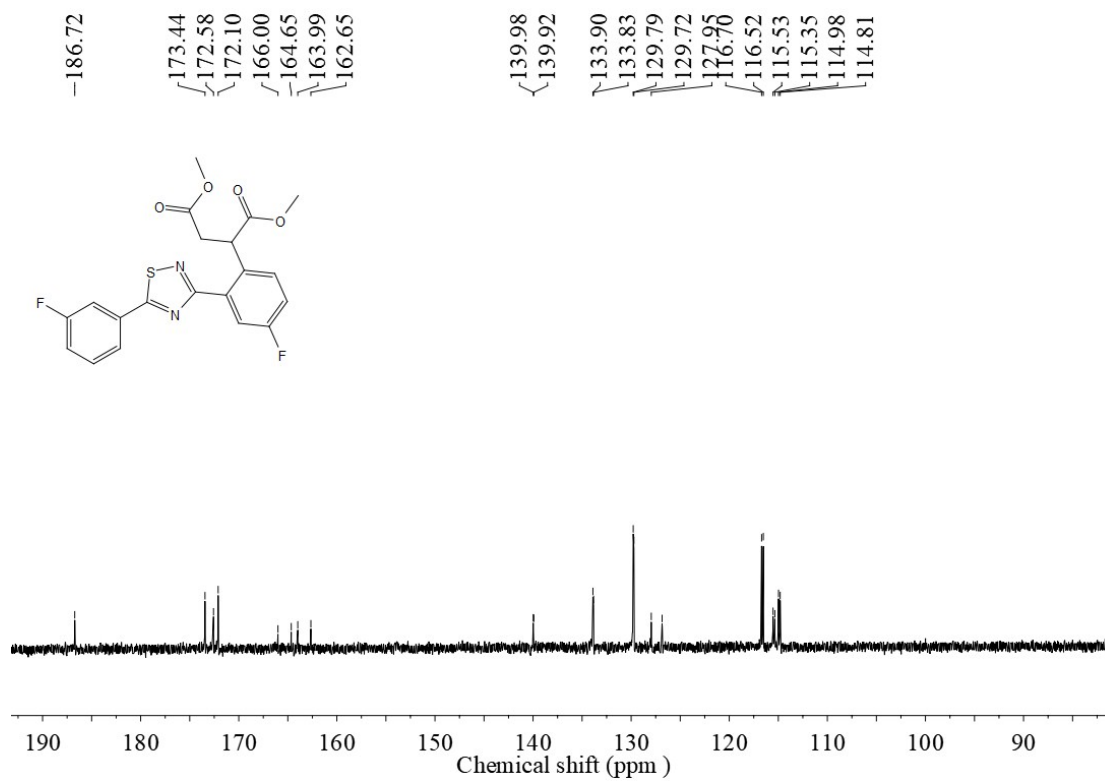

3ad:

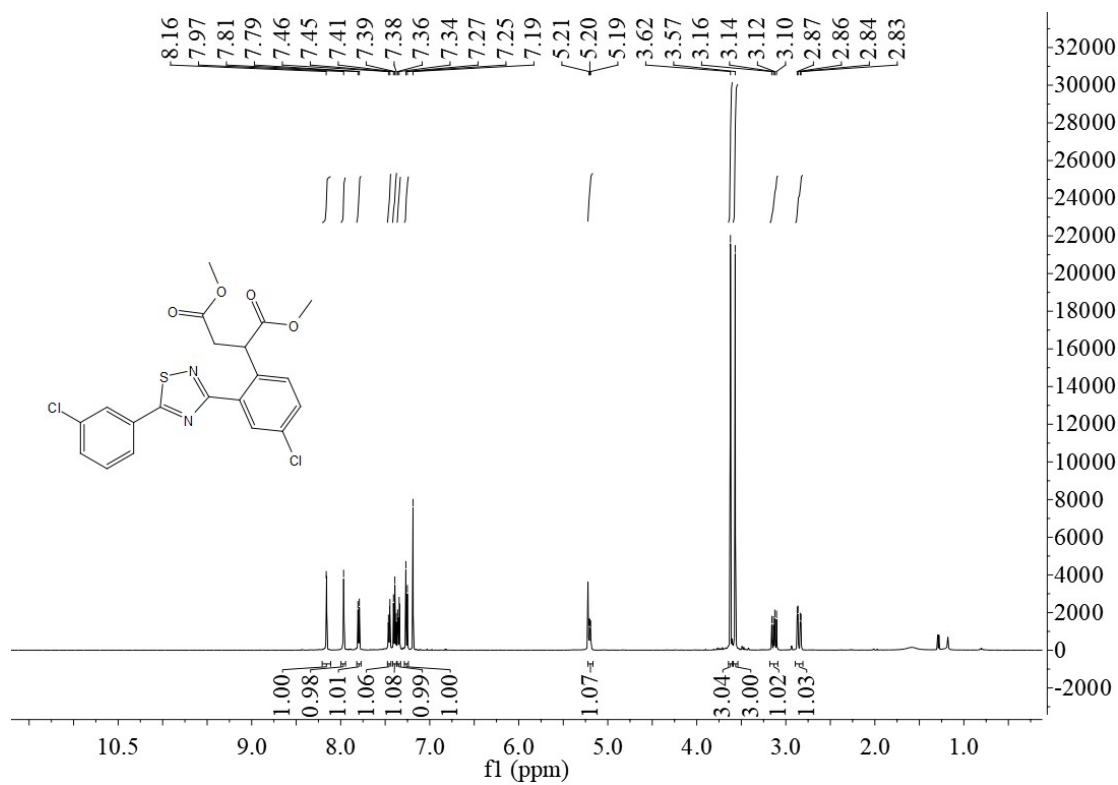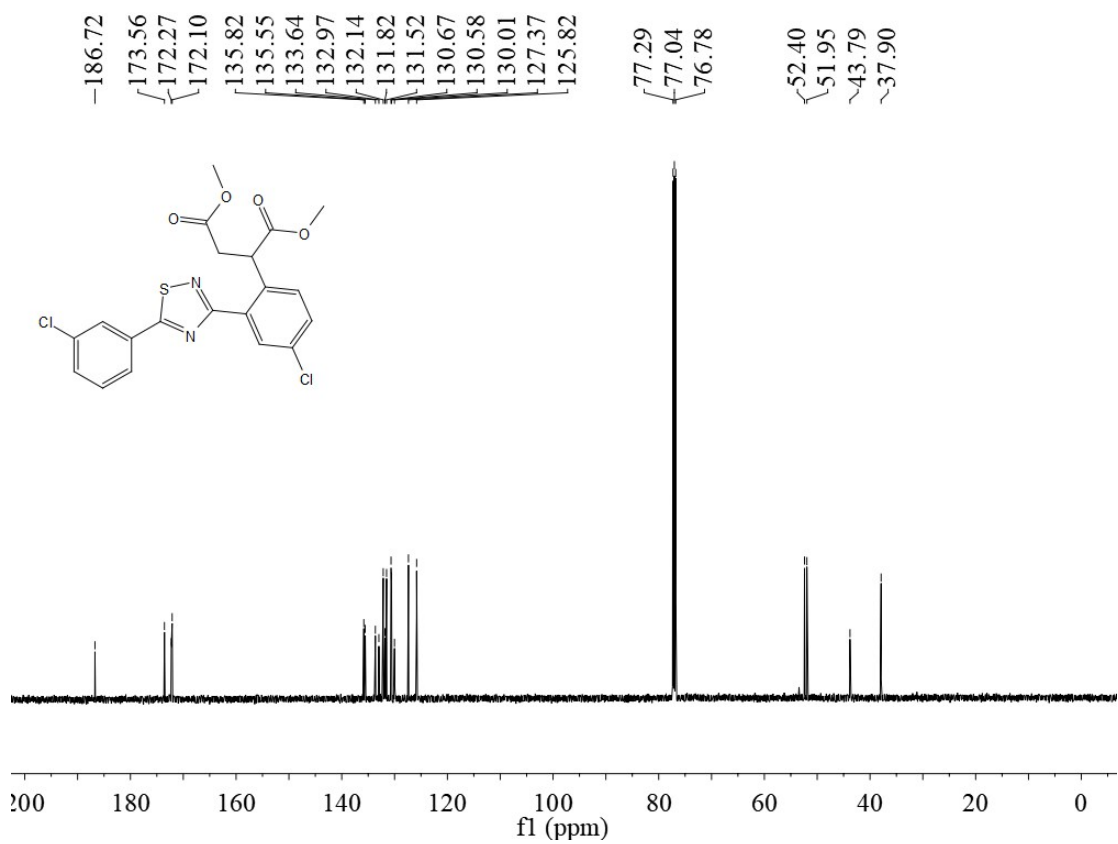

6a:

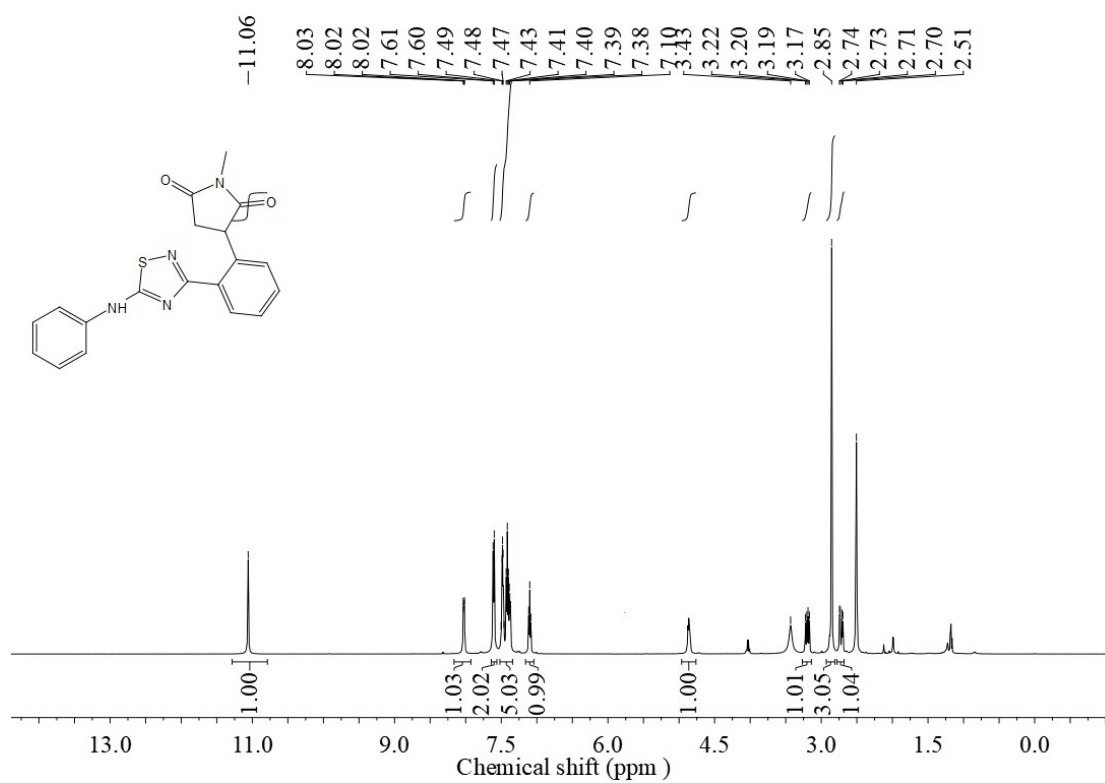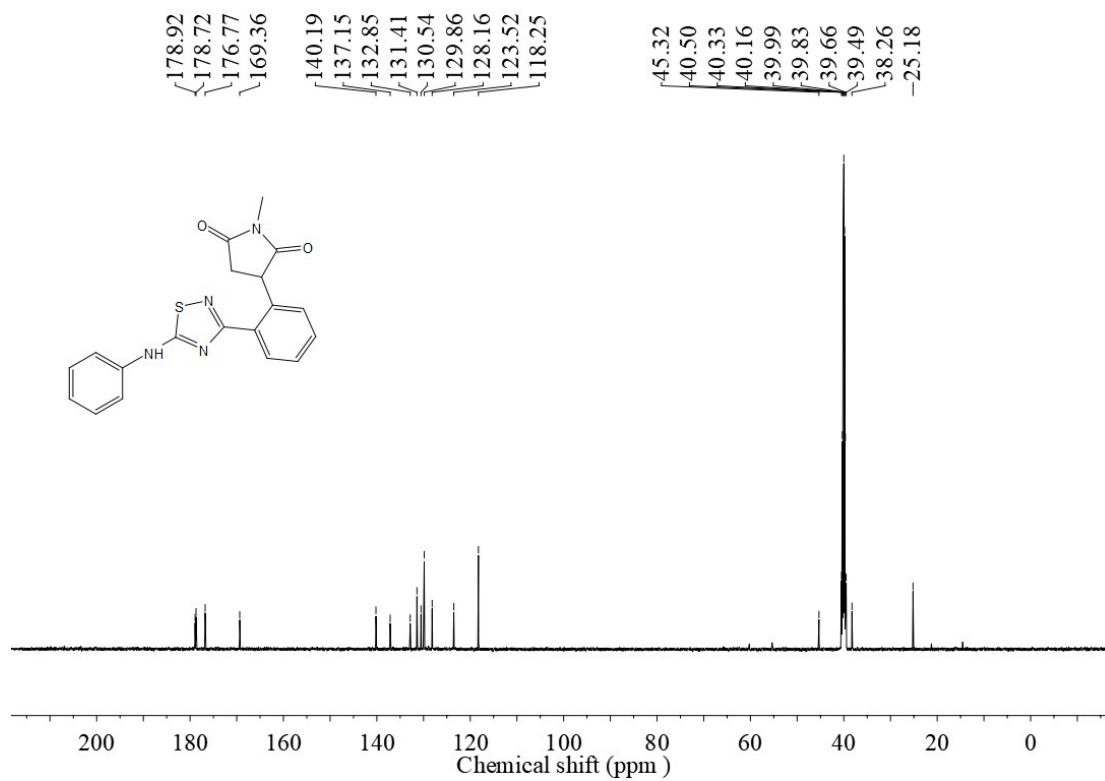

6b:

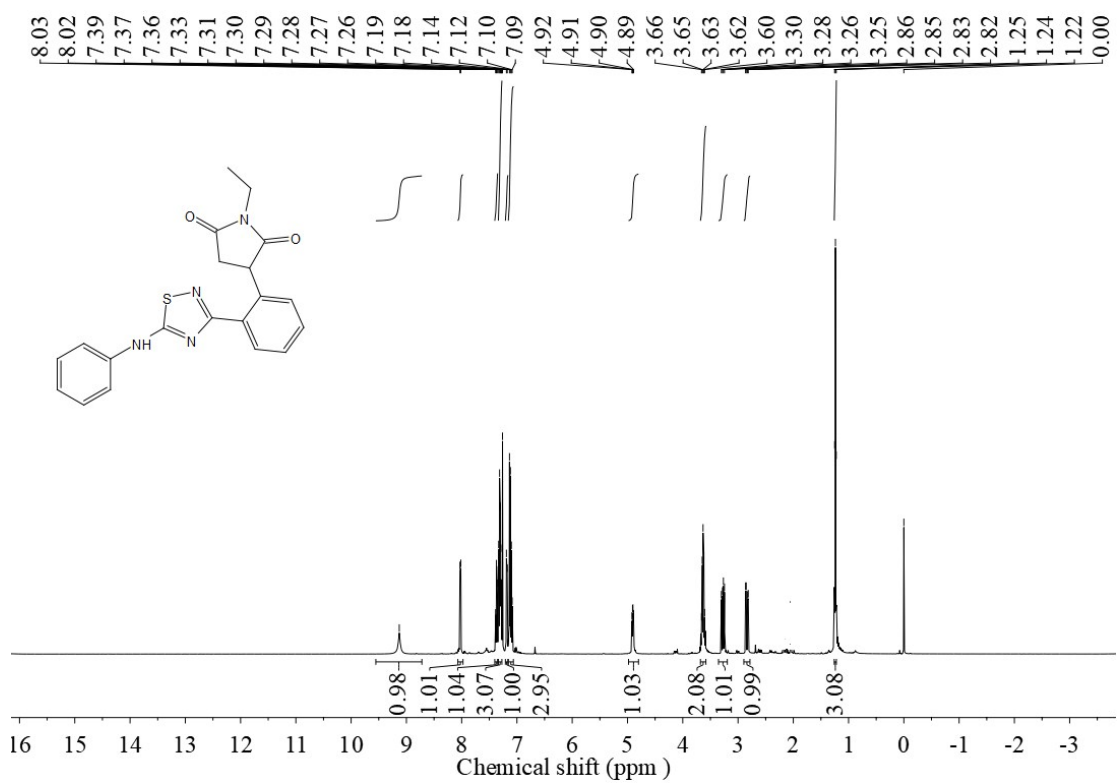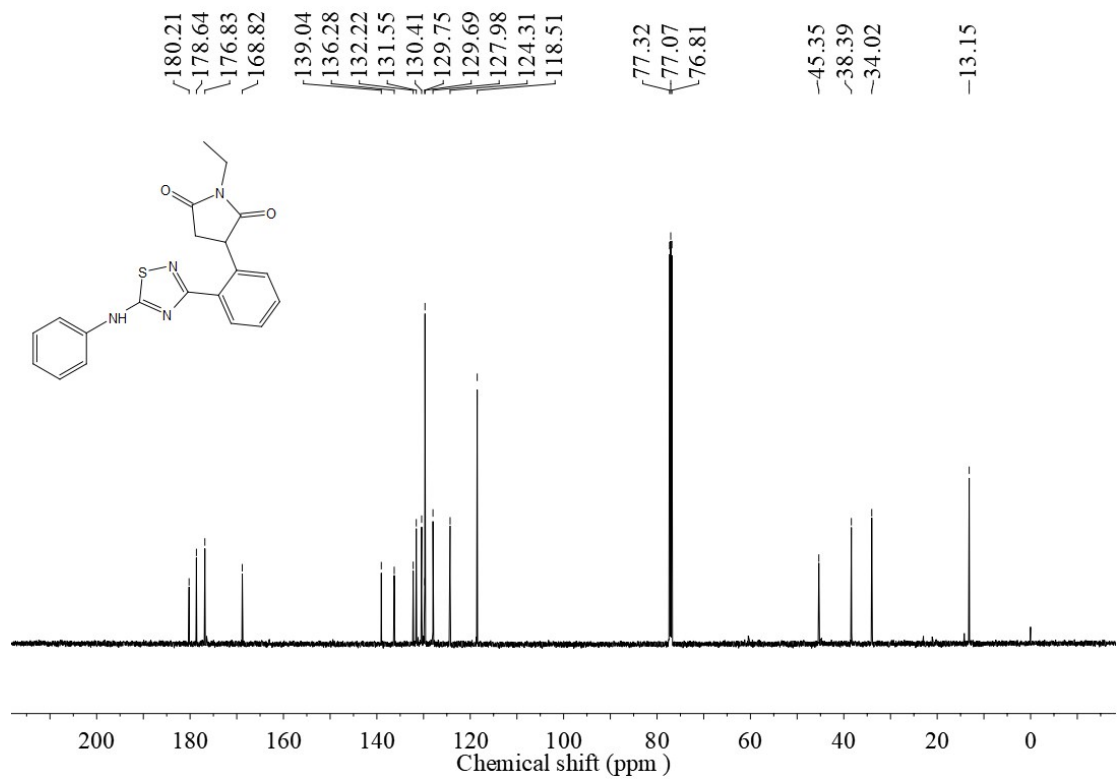

6c:

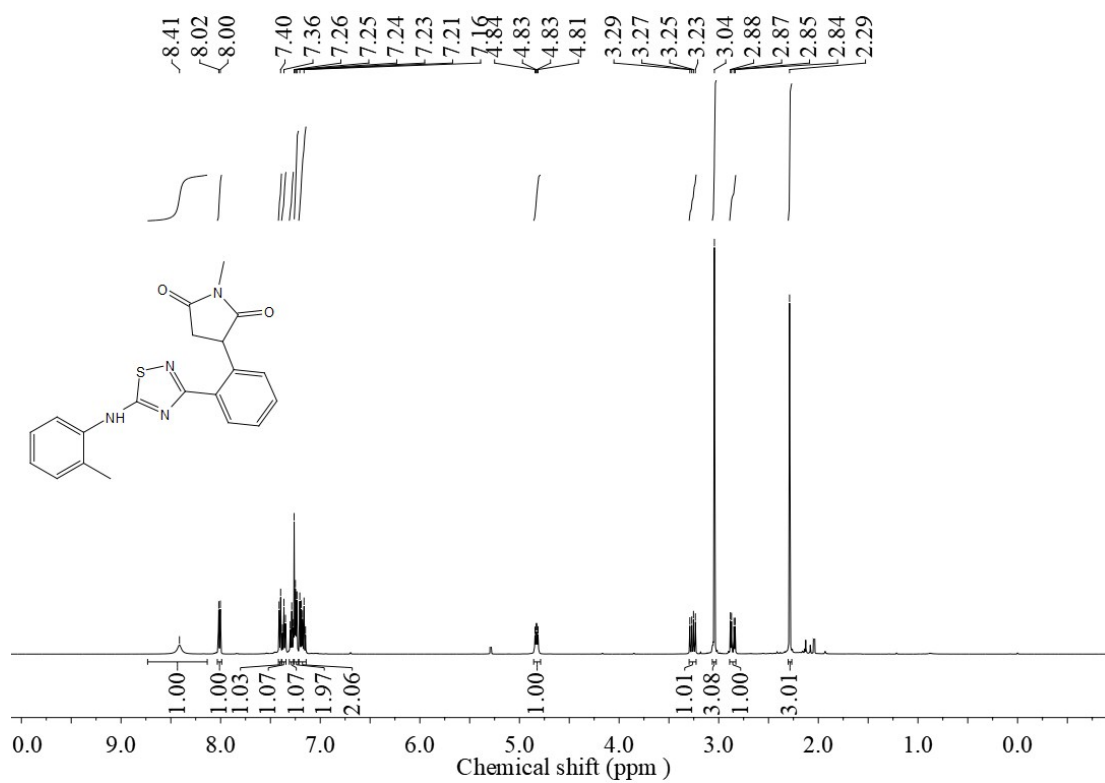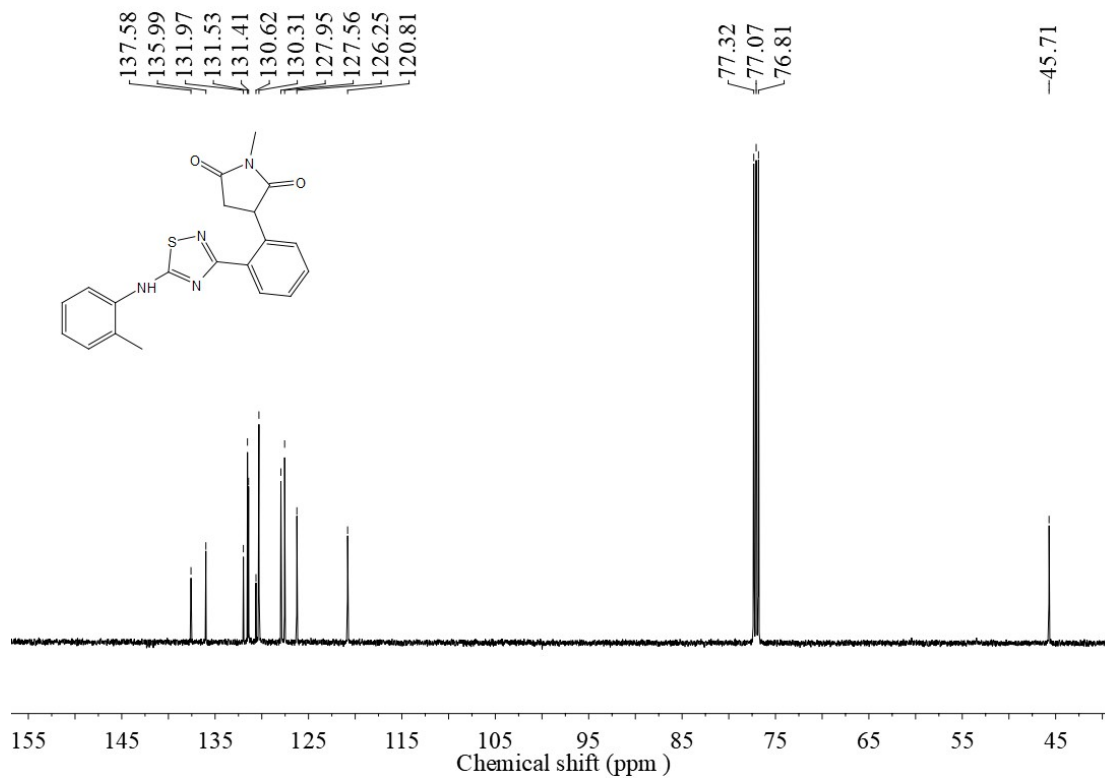

6d:

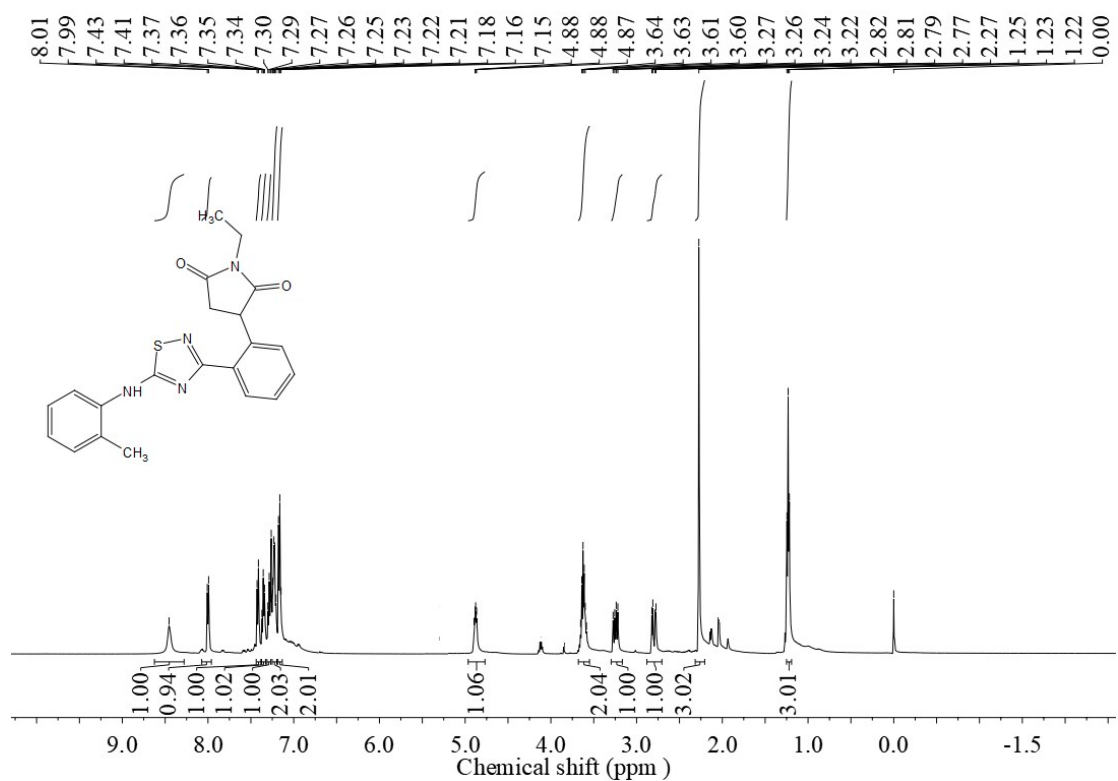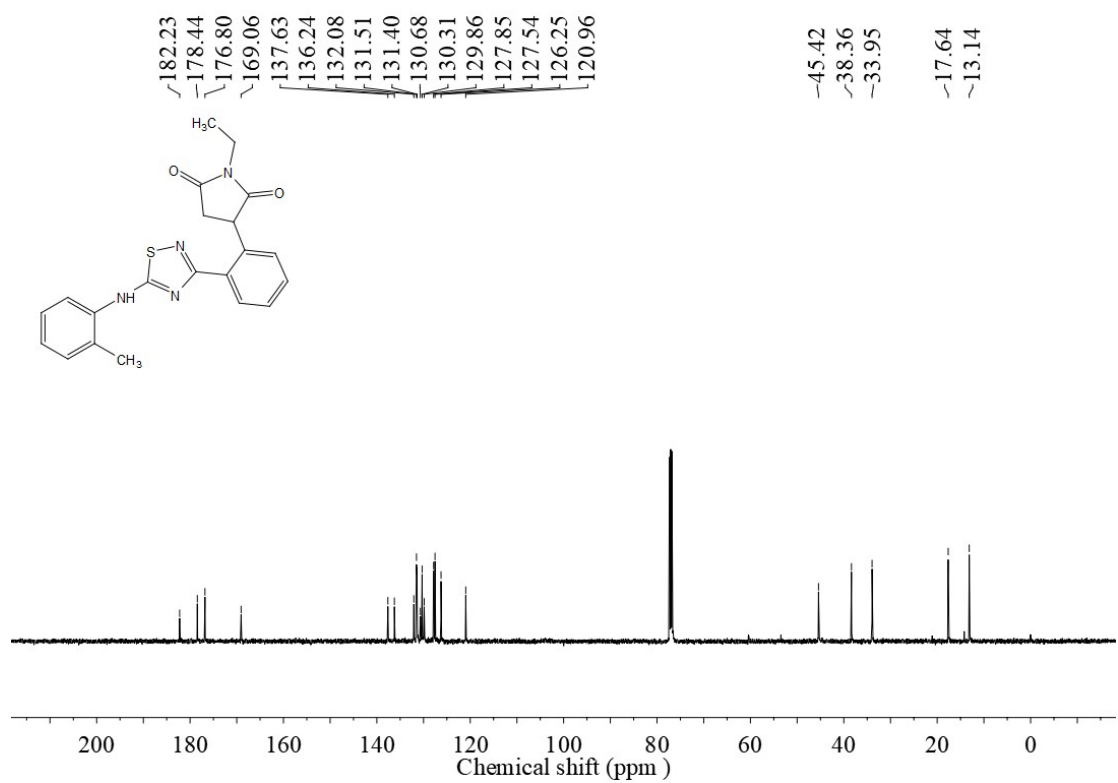

6e:

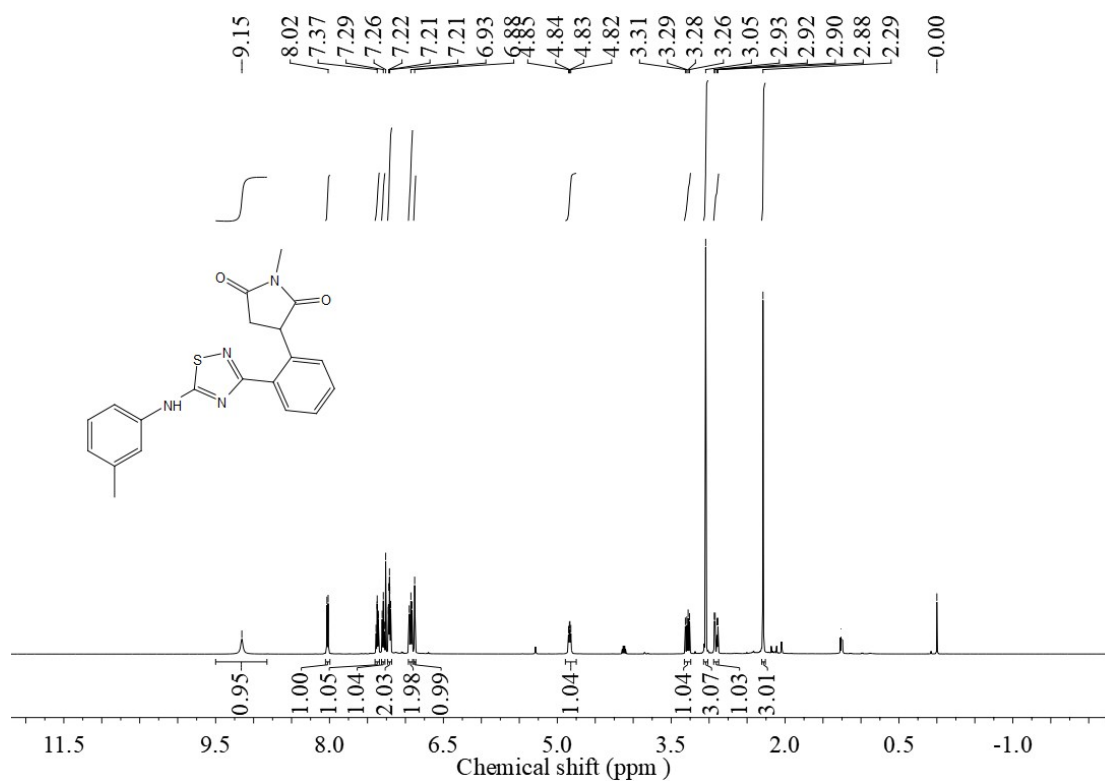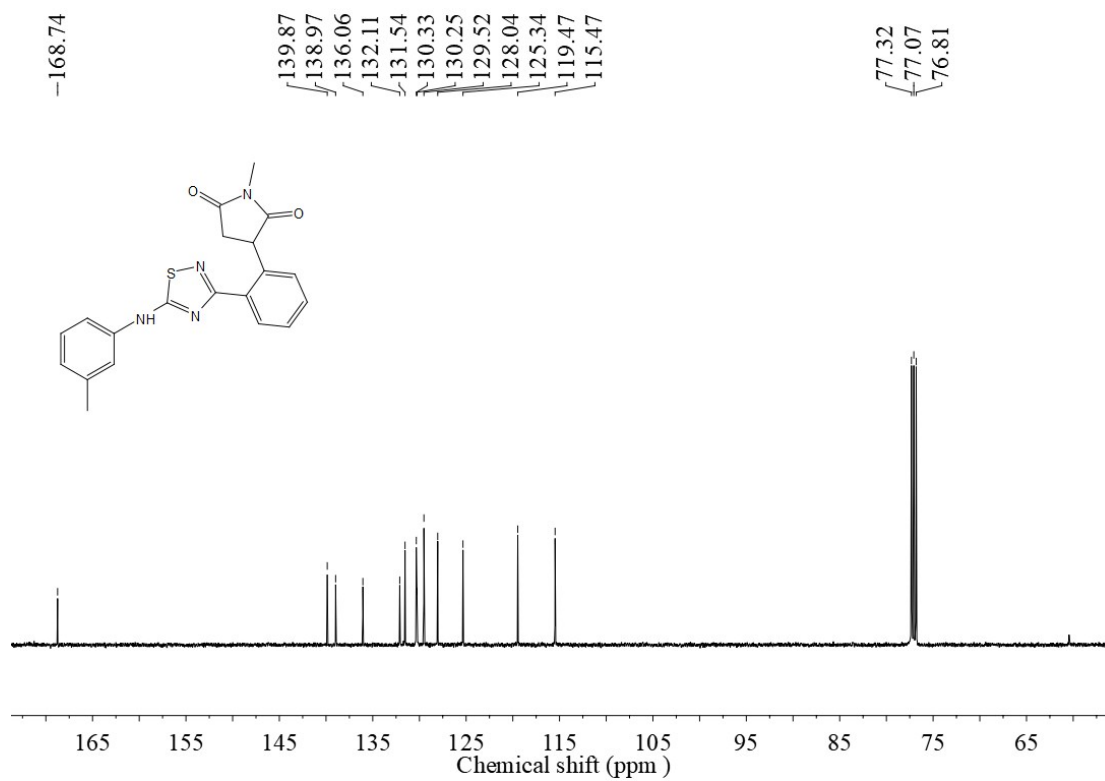

6f:

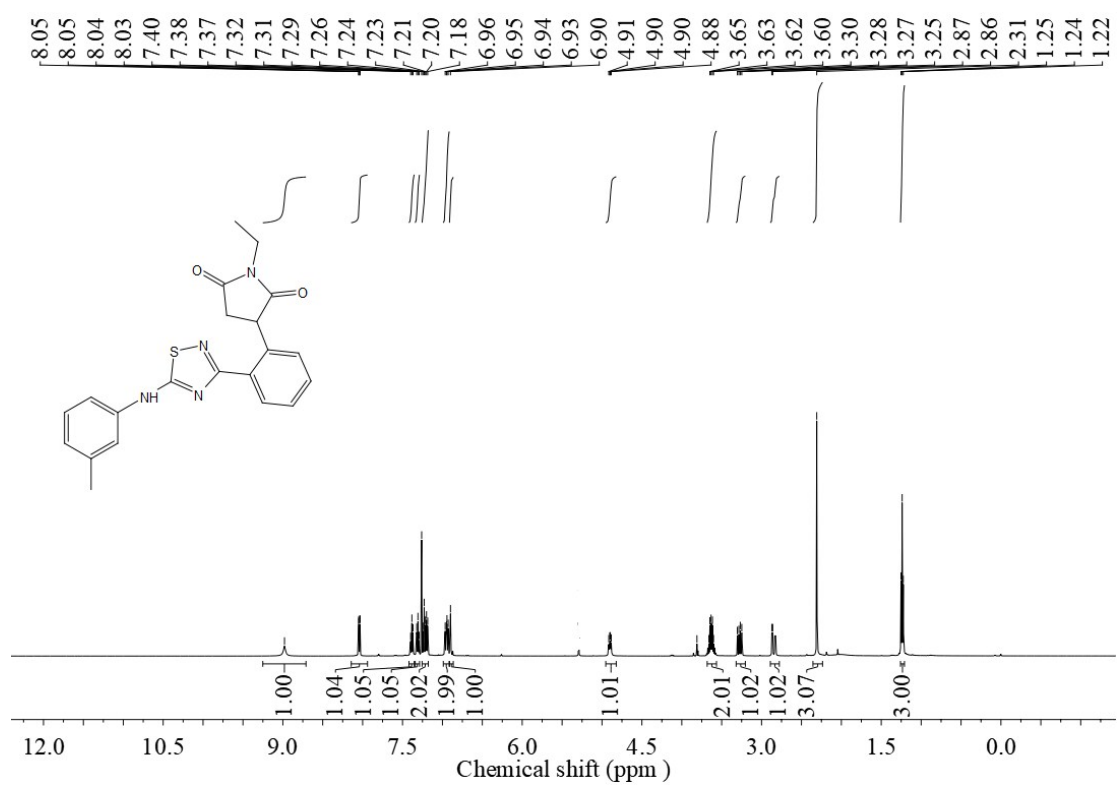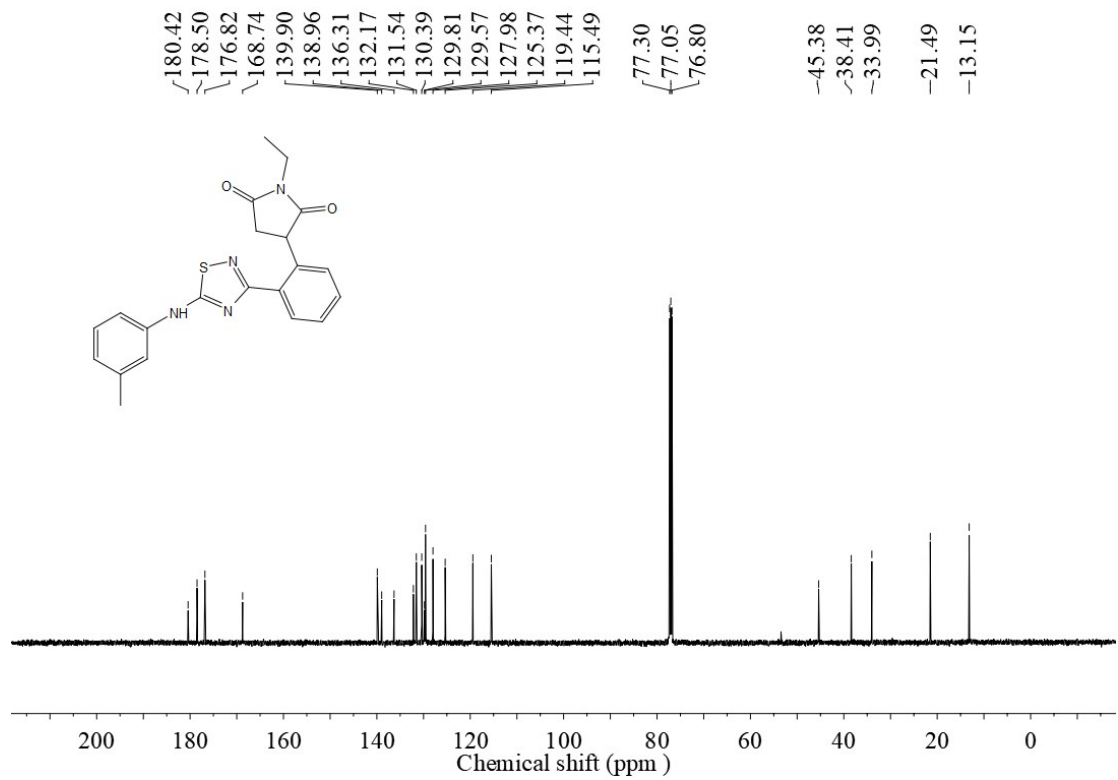



6g:

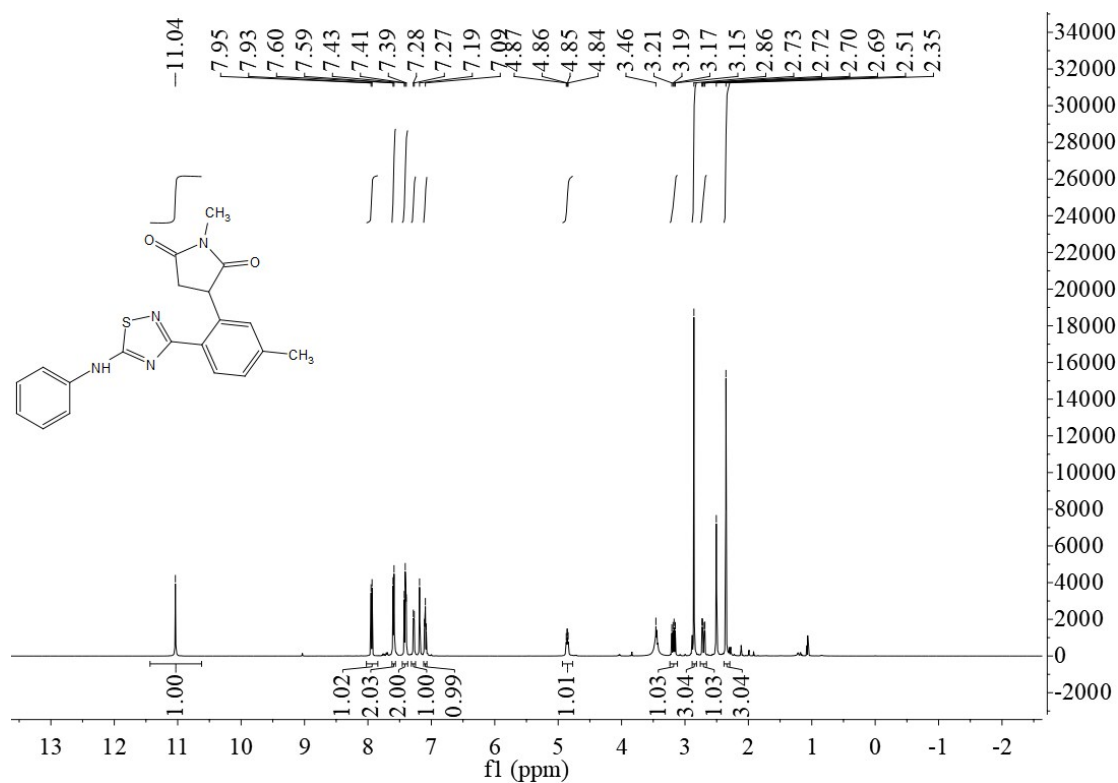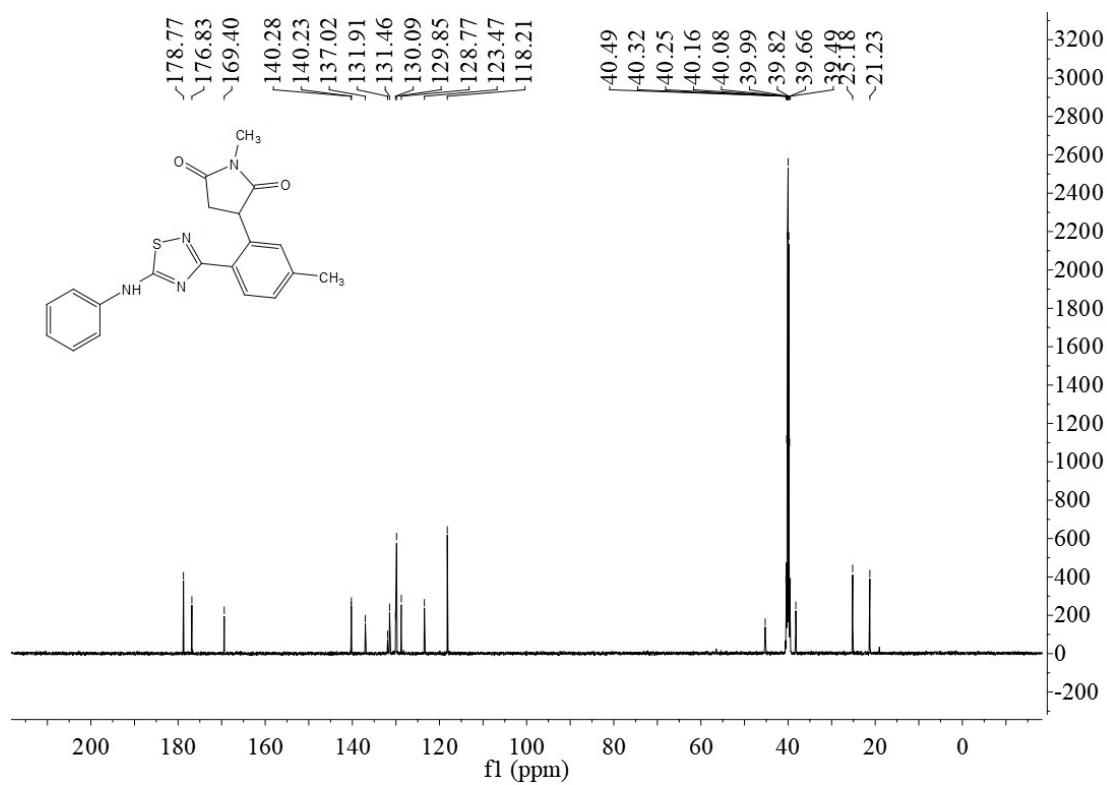

6h:

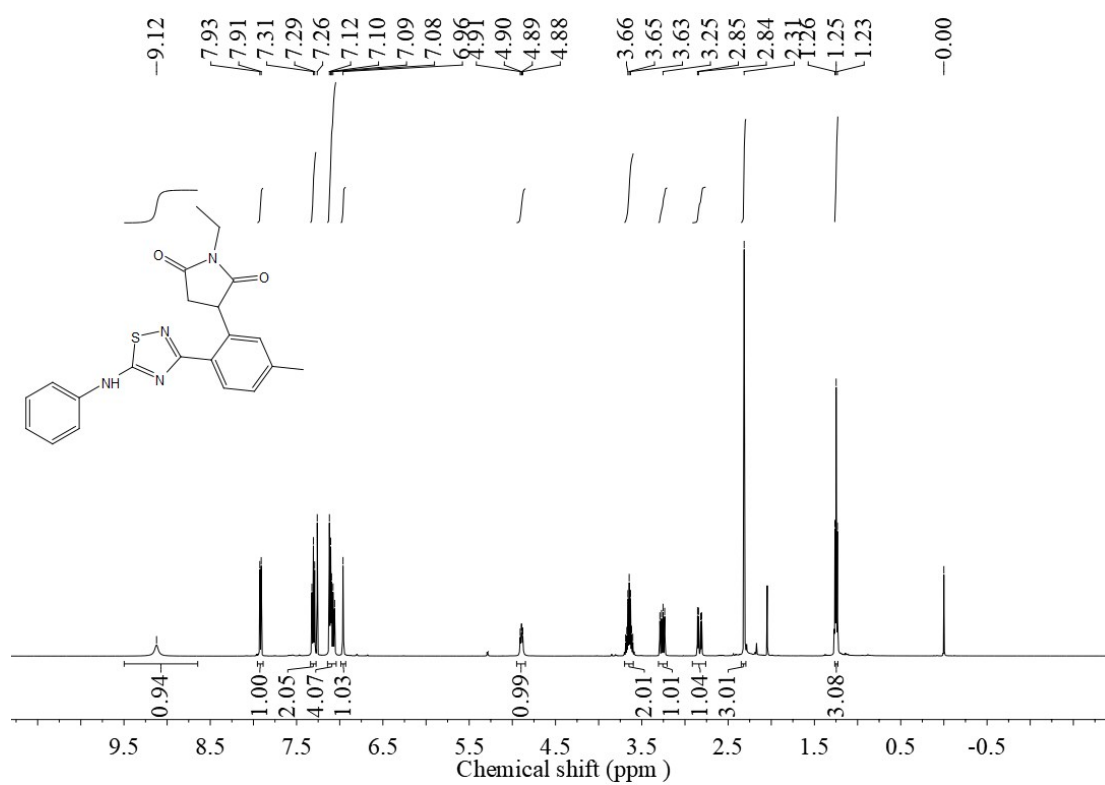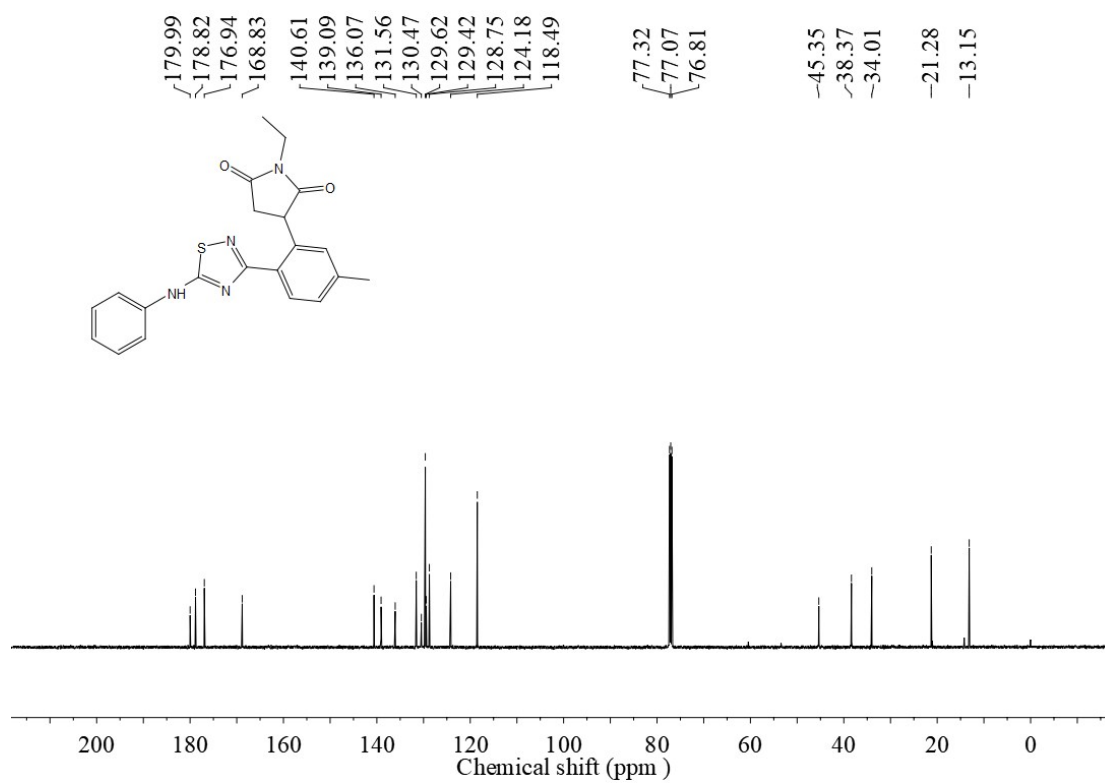

6i:

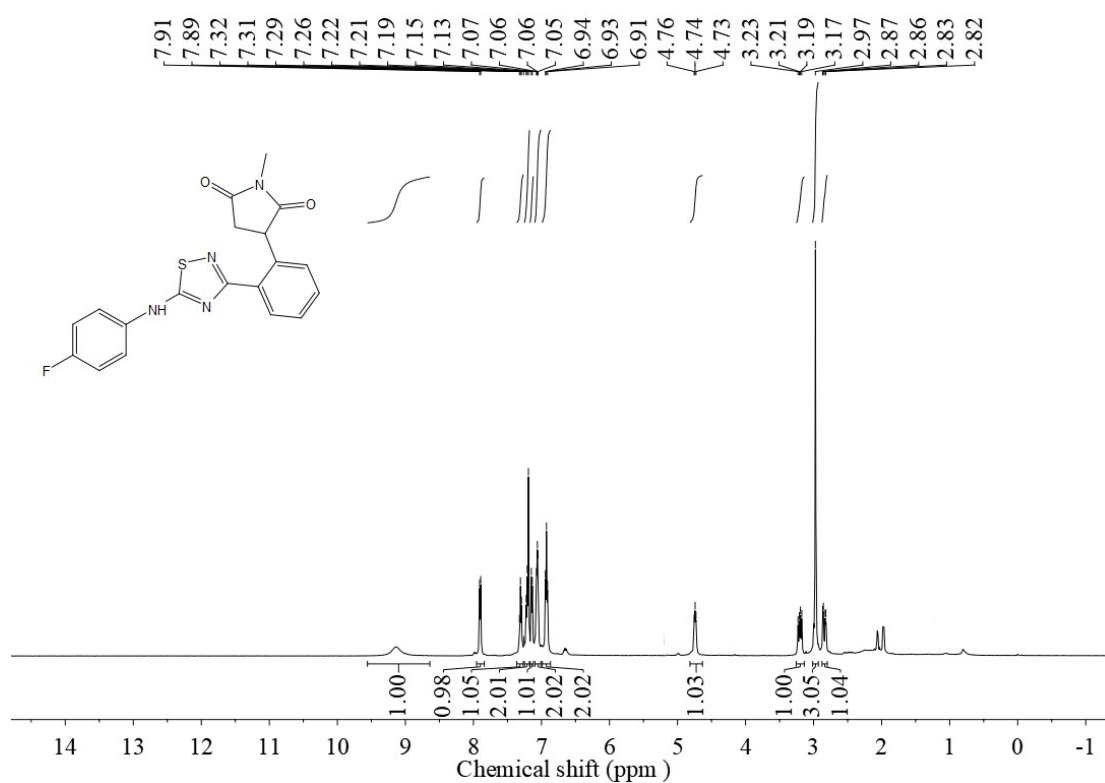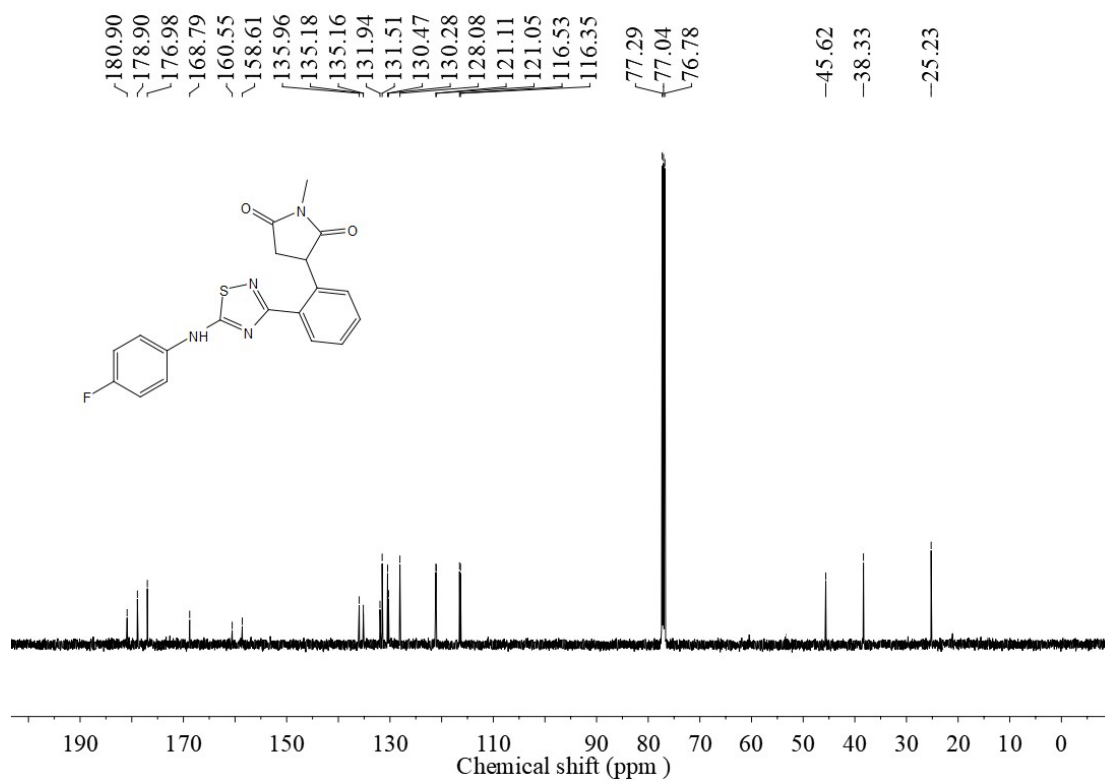

6j:

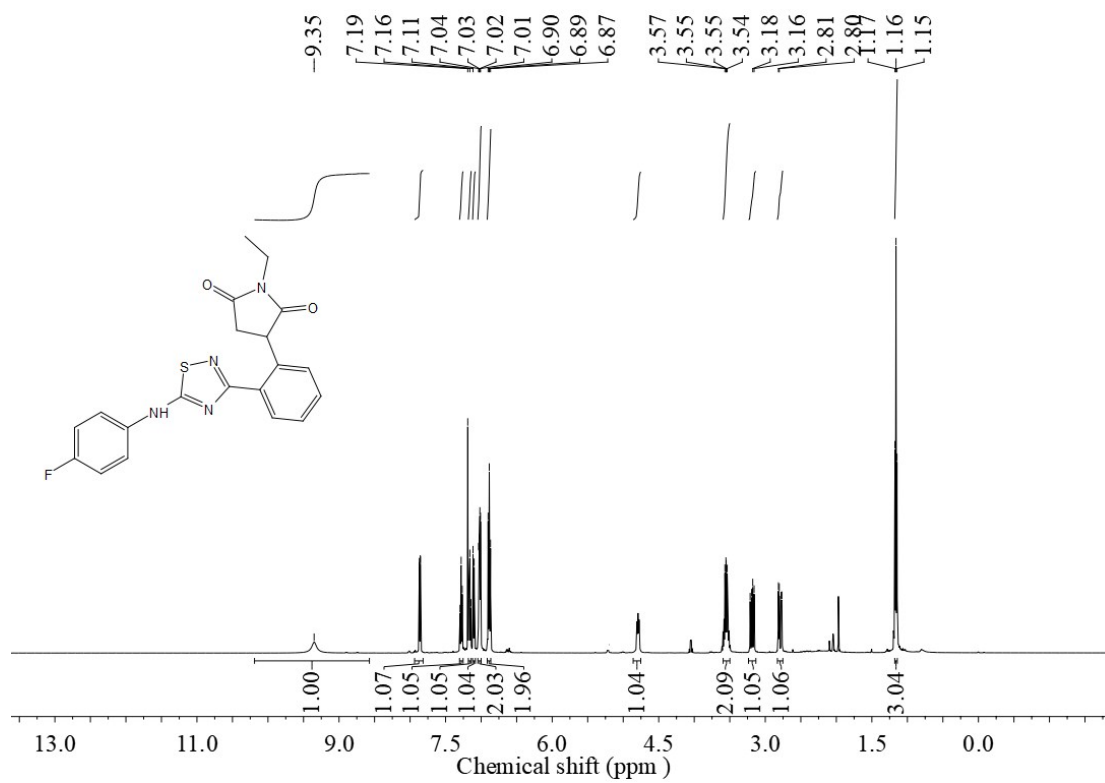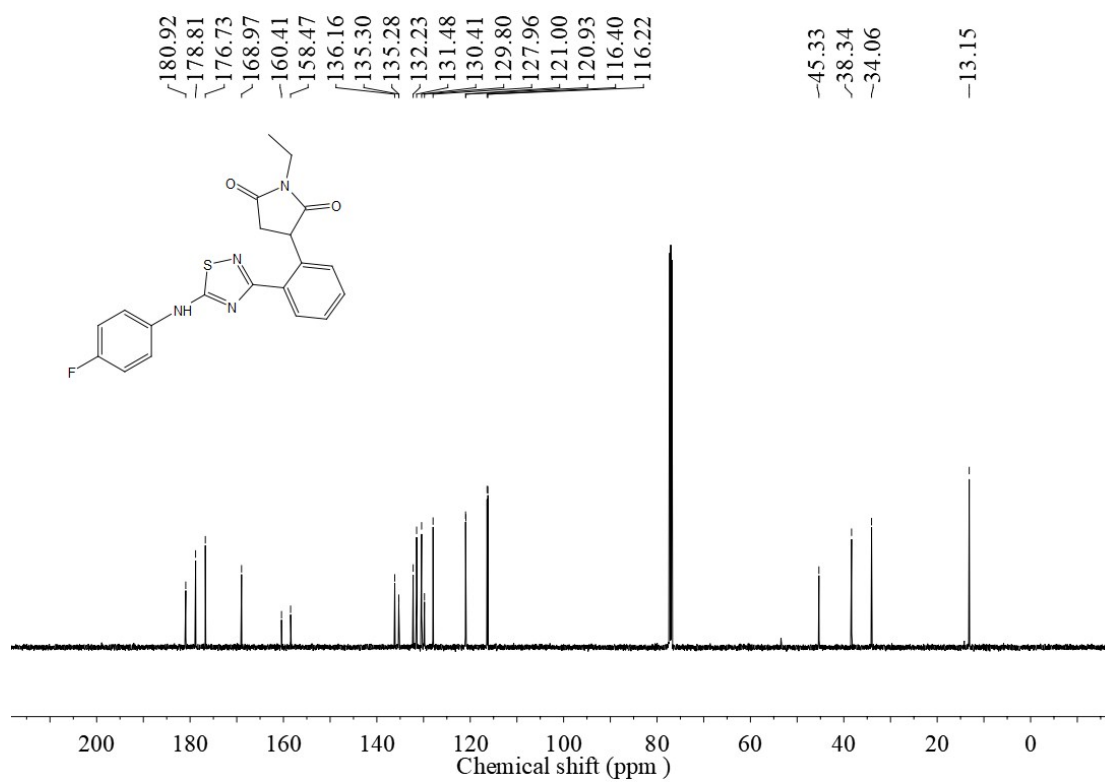

6k:

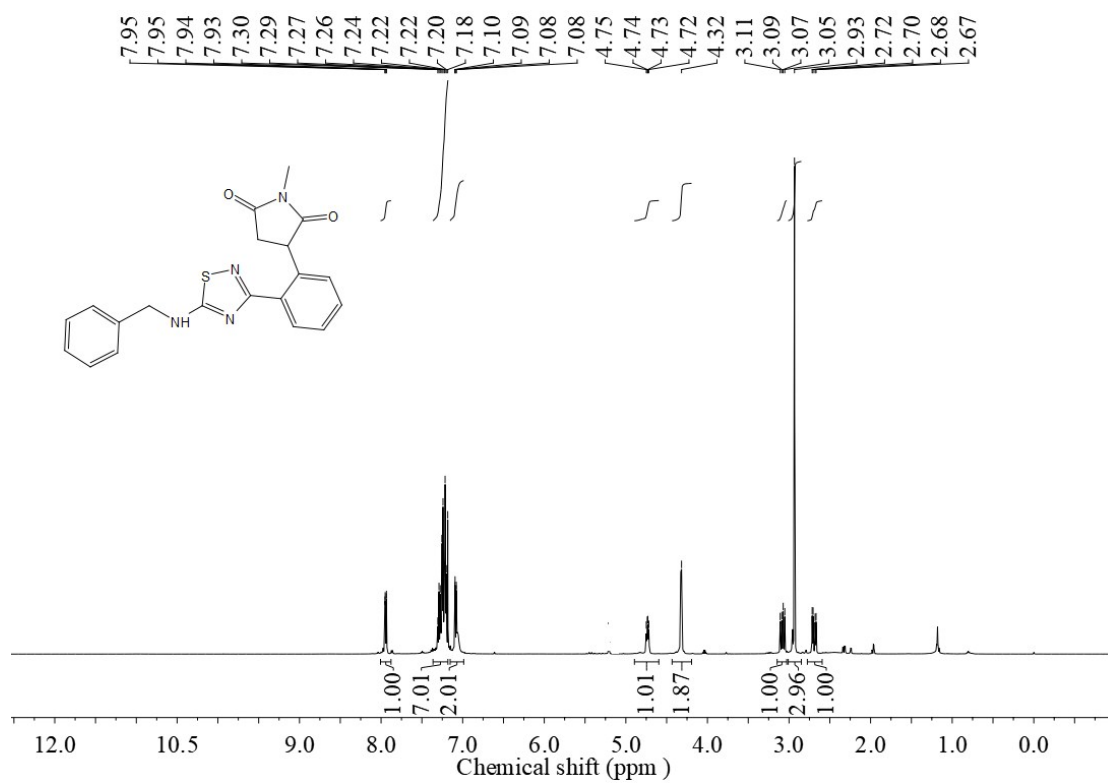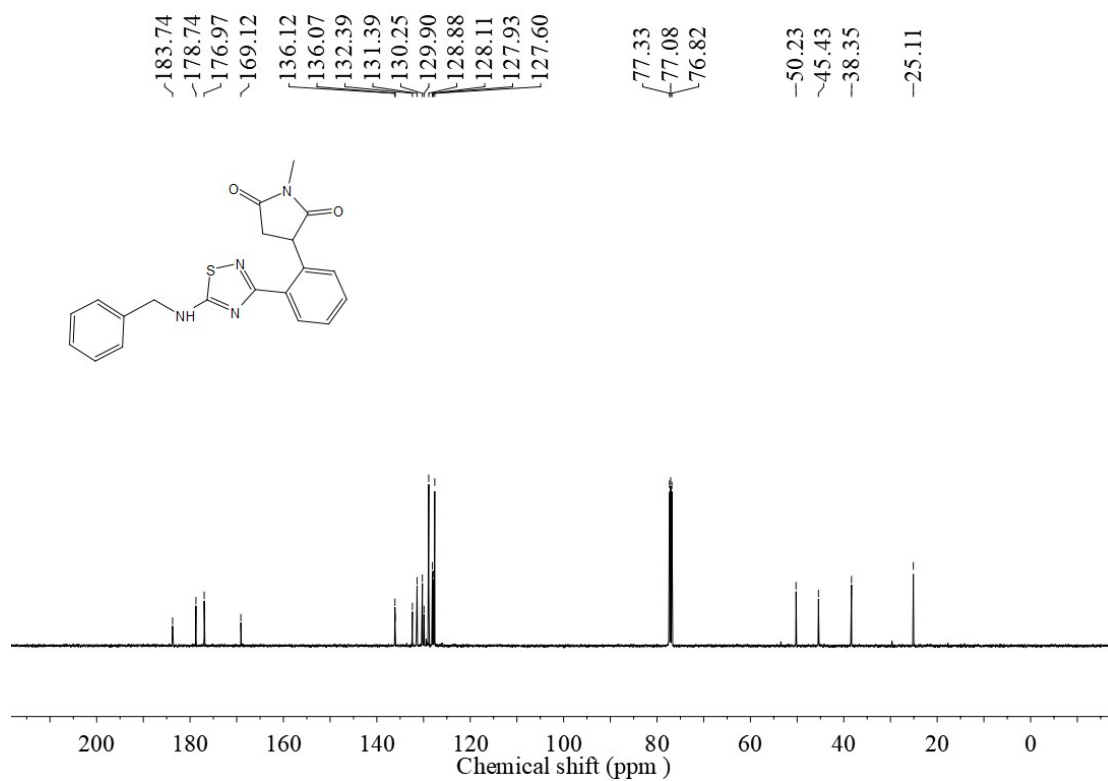

6l:

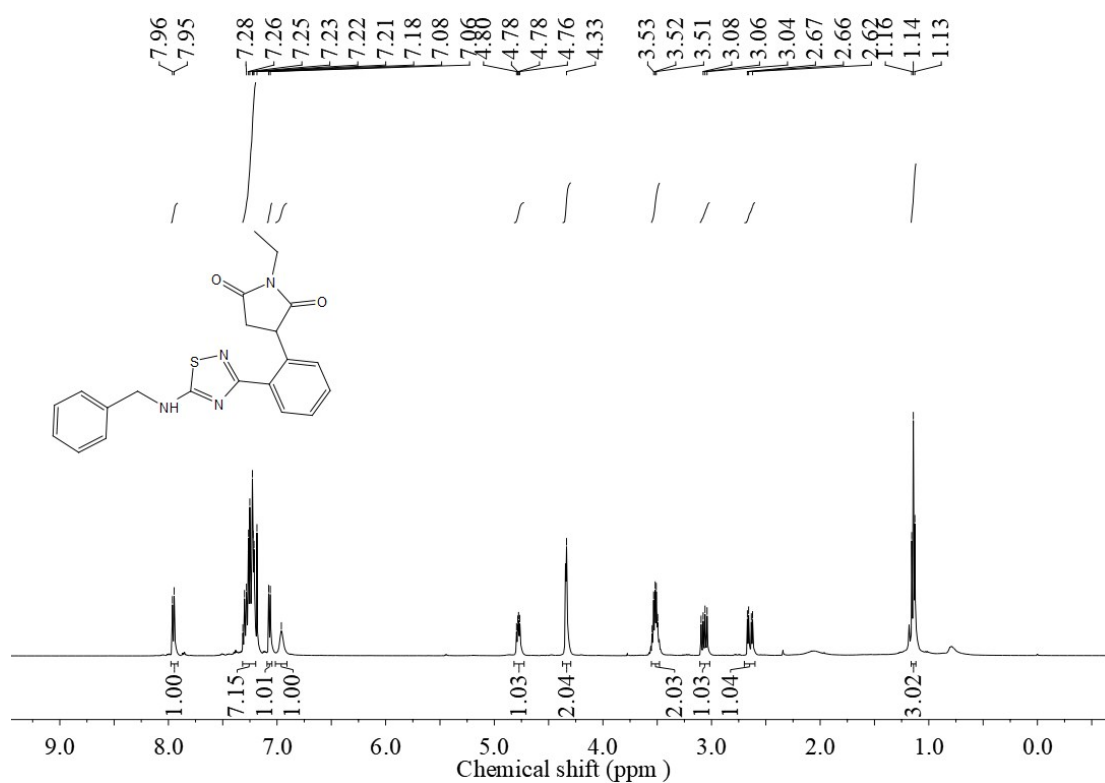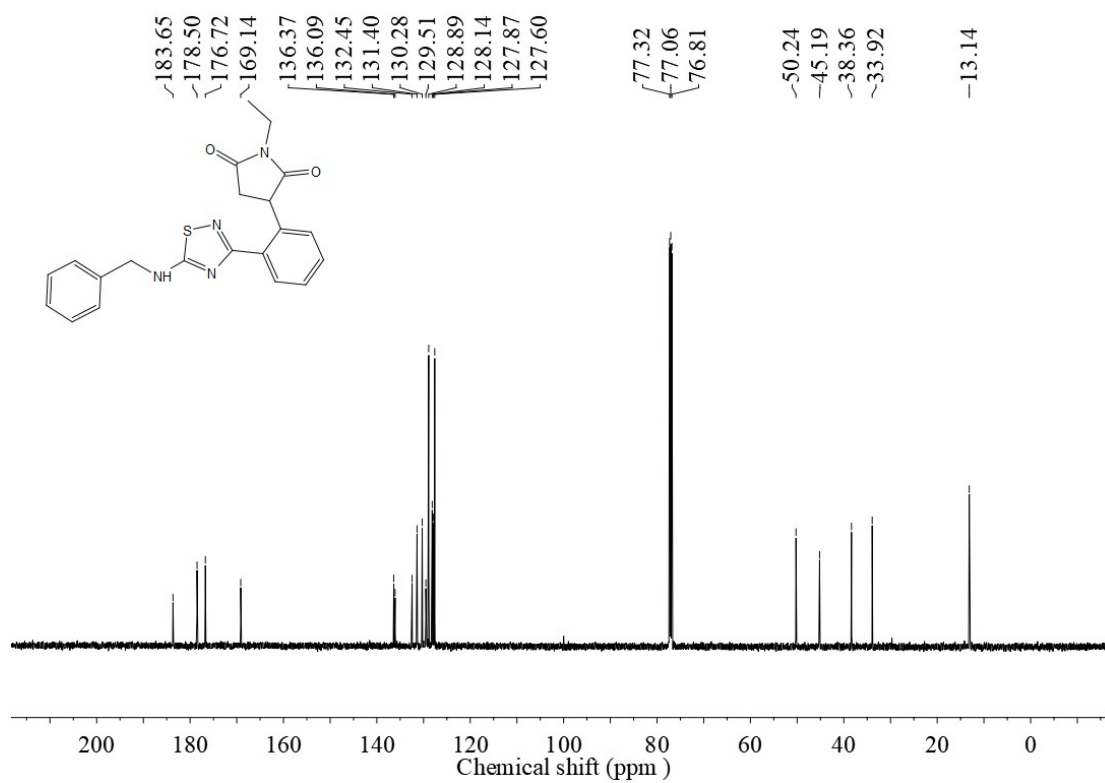

Supplement: c9ob01539f1.pdf [file c9ob01539f1.pdf]
